# Supplementary material for: A Tad-like apparatus is required for contact-dependent prey killing in predatory social bacteria
Source: eLife. 2021 Sep 10;10:e72409. doi: 10.7554/eLife.72409 (PMC8460266; doi:10.7554/eLife.72409)
Supplement: Figure 2—figure supplement 5—source data 1. [file elife-72409-fig2-figsupp5-data1.xlsx]

## Sheet: T6SS
Figure 2-figure supplement 5-source data 1
		Contact dependent-lysis and VipA-GFP dynamics
		Not correlated			Correlated
	No T6SS	41		Contracted	4
	Stretched	19
	Dynamic	20
