# Supplementary material for: A Tad-like apparatus is required for contact-dependent prey killing in predatory social bacteria
Source: eLife. 2021 Sep 10;10:e72409. doi: 10.7554/eLife.72409 (PMC8460266; doi:10.7554/eLife.72409)
Supplement: Figure 2—figure supplement 7—source data 1. [file elife-72409-fig2-figsupp7-data1.xlsx]

## Sheet: CPRG assay
Figure 2-figure supplement 7-source data 1					100 µl E. coli OD600= 10
					100 µl M. xanthus OD600= 0.5
					24 h incubation
	Exp 1	25 µl of cell lysat used									Exp 2	25 µl of cell lysat used
		8 min incubation										10 min incubation
							Average	Bckgrd sub.	Miller Units								Average	Bckgrd sub.	Miller Units
		<>	1	2	3	4						<>	5	6	7	8
	WT	A	0.6834	0.6752	0.6455	0.6502	0.663575	0.61525	3076.25		WT	A	0.6237	0.6254	0.6046	0.6281	0.62045	0.571825	2287.3
	∆kilACF	B	0.1132	0.1068	0.1012	0.0986	0.10495	0.056625	283.125		∆kilACF	B	0.1026	0.0957	0.0932	0.1715	0.11575	0.067125	268.5
	∆T6SS	C	0.6567	0.6329	0.6145	0.6289	0.63325	0.584925	2924.63		∆T6SS	C	0.6065	0.6087	0.6298	0.8443	0.672325	0.6237	2494.8
	∆pilA	D	0.0991	0.1452	0.0798	0.075	0.099775	0.05145	257.25		∆pilA	D	0.0749	0.0726	0.0754	0.0744	0.074325	0.0257	102.8
	∆aglQ	E	0.643	0.6317	0.626	0.6314	0.633025	0.5847	2923.5		∆aglQ	E	0.6275	0.6258	0.6252	0.7574	0.658975	0.61035	2441.4
	∆pilA∆aglQ	F	0.1129	0.121	0.0949	0.0942	0.10575	0.057425	287.125		∆pilA∆aglQ	F	0.0921	0.0929	0.0908	0.09	0.09145	0.042825	171.3
			9	10	11	12							9	10	11	12
	CF	A	0.0487	0.0473	0.0493	0.048	0.048325	0	0		CF	A	0.0488	0.0475	0.05	0.0482	0.048625	0	0
	Mx alone	B	0.0487	0.0484	0.0527	0.0491	0.049725	0.0014	7		Mx alone	B	0.0486	0.0487	0.0524	0.0491	0.0497	0.001075	4.3
	Ec alone	C	0.0509	0.0516	0.0533	0.0511	0.051725	0.0034	17		Ec alone	C	0.051	0.0516	0.0533	0.0513	0.0518	0.003175	12.7
	Exp 3	25 µl of cell lysat used									Exp 4	25 µl of cell lysat used
		16 min incubation										19 min incubation
							Average	Bckgrd sub.	Miller Units								Average	Bckgrd sub.	Miller Units
		<>	1	2	3	4						<>	5	6	7	8
	WT	A	0.6804	0.6718	0.6517	0.6494	0.663325	0.620025	1550.06			A	0.6416	0.6233	0.6195	0.6201	0.626125	0.581225	1223.63
	∆kilACF	B	0.0769	0.073	0.0724	0.0724	0.073675	0.030375	75.9375			B	0.0717	0.0726	0.0727	0.0727	0.072425	0.027525	57.9474
	∆T6SS	C	0.6365	0.5929	0.5822	0.5762	0.59695	0.55365	1384.12			C	0.5537	0.5411	0.5159	0.5252	0.533975	0.489075	1029.63
	∆pilA	D	0.0602	0.0586	0.0588	0.0568	0.0586	0.0153	38.25			D	0.0575	0.0575	0.0573	0.0575	0.05745	0.01255	26.4211
	∆aglQ	E	0.6443	0.6328	0.6375	0.6202	0.6337	0.5904	1476			E	0.6221	0.6163	0.6325	0.6379	0.6272	0.5823	1225.89
	∆pilA∆aglQ	F	0.0679	0.0626	0.0621	0.0616	0.06355	0.02025	50.625			F	0.0617	0.0622	0.062	0.0642	0.062525	0.017625	37.1053
			9	10									11	12
	CF	A	0.0426	0.044			0.0433	0	0		CF	A	0.0445	0.0453			0.0449	0	0
	Ec alone	B	0.0448	0.044			0.0444	0.0011	2.75		Ec alone	B	0.044	0.0439			0.04395	0	0
	Mx alone	C	0.0423	0.0421			0.0422	0	0		Mx alone	C	0.0422	0.0429			0.04255	0	0
