# Supplementary material for: A Tad-like apparatus is required for contact-dependent prey killing in predatory social bacteria
Source: eLife. 2021 Sep 10;10:e72409. doi: 10.7554/eLife.72409 (PMC8460266; doi:10.7554/eLife.72409)
Supplement: Figure 2—source data 1. [file elife-72409-fig2-data1.xlsx]

## Sheet: Figure 2c
Figure 2c source data	E. coli's fluorescence disappears when lysed by M. xanthus
	Time (seconds)	Normalized Fluorescence
	0	0.957773
	15	0.941107
	30	0.94
	45	0.895547
	60	0.902227
	75	0.936667
	90	0.88444
	105	0.90112
	120	0.94556
	135	0.85112
	150	0.868893
	165	0.771107
	180	0.714453
	195	0.721107
	210	0.717773
	225	0.69556
	240	0.716667
	255	0.722213
	270	0.72444
	285	0.733333
	300	0.79
	315	0.684453
	330	0.72
	345	0.835547
	360	0.992213
	375	0.921107
	390	1
	405	0.72112
	420	0.705547
	435	0.60888
	450	0.627773
	465	0.743333
	480	0.158893
	495	0.0344533
	510	0.0111067
	525	0.0344533
	540	0.0244533
	555	0.00112
	570	0.00554667
	585	0.0333333
	600	0.01
	615	0
	630	0.0211067
	645	0.0233333
	660	0.02
	675	0.00110667
	690	0.00666667
	705	0.0177733
	720	0.00889333
	735	0.01888
	750	0.00444
