# Supplementary material for: A Tad-like apparatus is required for contact-dependent prey killing in predatory social bacteria
Source: eLife. 2021 Sep 10;10:e72409. doi: 10.7554/eLife.72409 (PMC8460266; doi:10.7554/eLife.72409)
Supplement: Figure 3—figure supplement 3—source data 1. [file elife-72409-fig3-figsupp3-data1.xlsx]

## Sheet: CPRG assay
in 96-well plate	EV= pSWU19-PpilA empty vector					Figure 3-figure supplement 3 - source data
100 µl E. coli OD600= 10
100 µl M. xanthus OD600= 0.5
24 h incubation
	Experiment 1 (25 µl of cell lysat / 15 min incubation)										Experiment 2 - plate 1 (25µl of cell lysat / 10 min incubation)											Experiment 2 - plate 2 (25µl of cell lysat / 10 min incubation)
	<>	1	2	3	average	Bakground substraction	Miller Units				<>	1	2	3	4	average	Bakground substraction	Miller Units				<>	1	2	3	4	average	Bakground substraction	Miller Units
WT-EV clone 5	A	0.6728	0.6582	0.651	0.660667	0.603633	1609.69			WT-EV clone 5	A	0.648	0.6072	0.5519	0.5701	0.5943	0.53255	2130.2			∆kilG (∆mxan_4651)-EV clone 5	A	0.1949	0.1833	0.1836	0.1928	0.18865	0.14295	571.8
∆kilC (∆mxan_3106)-EV clone 4	B	0.1955	0.176	0.1754	0.1823	0.125267	334.044			WT-EV clone 6	B	0.5542	0.4624	0.3996	0.3531	0.442325	0.380575	1522.3			∆kilG (∆mxan_4651)-EV clone 6	B	0.232	0.2197	0.2231	0.2167	0.222875	0.177175	708.7
∆kilC + PpilA-kilC (mxan_3106) clone 2	C	0.6595	0.5923	0.5862	0.612667	0.555633	1481.69			∆kilC (∆mxan_3106)-EV clone 3	C	0.0865	0.0799	0.078	0.0761	0.080125	0.018375	73.5			∆kilG + PpilA-kilG (mxan_4651) clone 1	C	0.6225	0.581	0.5653	0.5768	0.5864	0.5407	2162.8
∆kilC + PpilA-kilC (mxan_3106) clone 5	D	0.6044	0.4794	0.453	0.512267	0.455233	1213.96			∆kilC (∆mxan_3106)-EV clone 4	D	0.1051	0.0948	0.087	0.0847	0.0929	0.03115	124.6			∆kilG + PpilA-kilG (mxan_4651) clone 2	D	0.6207	0.591	0.5935	0.5866	0.59795	0.55225	2209
∆kilF (∆mxan_3107)-EV clone 6	E	0.1766	0.1629	0.1592	0.166233	0.1092	291.2			∆kilC + PpilA-kilC (mxan_3106) clone 2	E	0.5397	0.4698	0.37	0.3499	0.43235	0.3706	1482.4			∆kilG + PpilA-kilG (mxan_4651) clone 3	E	0.6169	0.5979	0.5821	0.6041	0.60025	0.55455	2218.2
∆kilF+ PpilA-kilF (mxan_3107) clone 1	F	0.6593	0.5837	0.5617	0.601567	0.544533	1452.09			∆kilC + PpilA-kilC (mxan_3106) clone 4	F	0.5784	0.5346	0.4463	0.3809	0.48505	0.4233	1693.2			∆kilG + PpilA-kilG (mxan_4651) clone 4	F	0.6128	0.6042	0.6039	0.6158	0.609175	0.563475	2253.9
∆kilF+ PpilA-kilF (mxan_3107) clone 2	G	0.6768	0.6444	0.608	0.643067	0.586033	1562.76			∆kilC + PpilA-kilC (mxan_3106) clone 5	G	0.5848	0.5599	0.467	0.454	0.516425	0.454675	1818.7					5	6	7	8
		4	5	6						∆kilC + PpilA-kilC (mxan_3106) clone 6	H	0.5343	0.5612	0.4895	0.5131	0.524525	0.462775	1851.1			CF alone	A	0.045	0.0455	0.0465	0.0458	0.0457	0	0
∆kilH (∆mxan_4650)-EV clone 4	A	0.1817	0.1807	0.1783	0.180233	0.1232	328.533					5	6	7	8						Ec alone	B	0.0419	0.0423	0.0418	0.0417	0.041925	0	0
∆kilH + PpilA-kilH (mxan_4650) clone 2	B	0.5708	0.5664	0.5736	0.570267	0.513233	1368.62			∆kilF (∆mxan_3107)-EV clone 4	A	0.087	0.0847	0.0891	0.0887	0.087375	0.025625	102.5			Mx WT-EV alone	C	0.0454	0.047	0.0467	0.0479	0.04675	0.00105	4.2
∆kilH + PpilA-kilH (mxan_4650) clone 3	C	0.6173	0.5937	0.5989	0.6033	0.546267	1456.71			∆kilF (∆mxan_3107)-EV clone 6	B	0.0659	0.0661	0.0678	0.0687	0.067125	0.005375	21.5
∆kilG (∆mxan_4651)-EV clone 6	D	0.1724	0.1724	0.1731	0.172633	0.1156	308.267			∆kilF+ PpilA-kilF (mxan_3107) clone 1	C	0.4917	0.457	0.4847	0.5352	0.49215	0.4304	1721.6
∆kilG + PpilA-kilG (mxan_4651) clone 1	E	0.5751	0.5986	0.6135	0.595733	0.5387	1436.53			∆kilF+ PpilA-kilF (mxan_3107) clone 2	D	0.4093	0.389	0.4356	0.4594	0.423325	0.361575	1446.3
∆kilG + PpilA-kilG (mxan_4651) clone 2	F	0.5985	0.615	0.6436	0.619033	0.562	1498.67			∆kilF+ PpilA-kilF (mxan_3107) clone 3	E	0.404	0.4331	0.436	0.5524	0.456375	0.394625	1578.5
		7	8	9						∆kilF+ PpilA-kilF (mxan_3107) clone 4	F	0.4632	0.4567	0.4804	0.4961	0.4741	0.41235	1649.4
CF alone	D	0.0461	0.053	0.072	0.0570333	0	0			∆kilH (∆mxan_4650)-EV clone 4	G	0.1029	0.1011	0.1005	0.1025	0.10175	0.04	160
Ec alone	E	0.0481	0.048	0.0537	0.0499333	0	0			∆kilH (∆mxan_4650)-EV clone 5	H	0.1479	0.1481	0.1534	0.1642	0.1534	0.09165	366.6
Mx WT-EV alone	F	0.0435	0.0429	0.045	0.0438	0	0					9	10	11	12
										∆kilH + PpilA-kilH (mxan_4650) clone 1	A	0.6269	0.6338	0.6446	0.6312	0.634125	0.572375	2289.5
										∆kilH + PpilA-kilH (mxan_4650) clone 2	B	0.573	0.6099	0.6161	0.6616	0.61515	0.5534	2213.6
										∆kilH + PpilA-kilH (mxan_4650) clone 3	C	0.5779	0.5992	0.6201	0.6517	0.612225	0.550475	2201.9
										∆kilH + PpilA-kilH (mxan_4650) clone 4	D	0.5572	0.5864	0.5735	0.6427	0.58995	0.5282	2112.8
										CF alone	E	0.0625	0.0504	0.0762	0.0579	0.06175	0	0
										Ec alone	F	0.0431	0.0421	0.042	0.0419	0.042275	0	0
										Mx WT-EV alone	G	0.0478	0.0487	0.0492	0.0465	0.04805	0	0
