# Supplementary material for: A Tad-like apparatus is required for contact-dependent prey killing in predatory social bacteria
Source: eLife. 2021 Sep 10;10:e72409. doi: 10.7554/eLife.72409 (PMC8460266; doi:10.7554/eLife.72409)
Supplement: Figure 3—source data 1. [file elife-72409-fig3-data1.xlsx]

## Sheet: CPRG assay
Figure 3b - source data
96-well plate - TECAN plate reader											96-well plate - TECAN plate reader											96-well plate - TECAN plate reader												96-well plate - TECAN plate reader
	Experiment 1	(25 µl of cell lysat used / 15 min incubation)											Experiment 2	(25 µl of cell lysat used / 25 min incubation)										Experiment 3	(25 µl of cell lysat used / 25 min incubation)											Experiment 4	(25 µl of cell lysat used / 26 min incubation)
	Absorbances 576 nm												Absorbances 576 nm											Absorbances 576 nm												Absorbances 576 nm
		<>	1	2	3	4	AVERAGE	Background substraction	Miller Units				<>	1	2	3	4	AVERAGE	Background substraction	Miller Units				<>	1	2	3	4	AVERAGE	Background substraction	Miller Units					<>	1	2	3	4	AVERAGE	Background substraction	Miller Units
	DZ2 WT	A	0.5965	0.5781	0.5552	0.5581	0.571975	0.52565	1401.73			DZ2 WT	A	0.8852	0.8455	0.8101	0.7698	0.82765	0.777475	1243.96			DZ2 WT	A	0.6392	0.5056	0.4547	0.476	0.518875	0.4677	748.32				DZ2 WT	A	0.6177	0.5974	0.5729	0.5789	0.591725	0.5307	816.462
/	/	B	/	/	/	/	/	/	/		/	/	B	/	/	/	/	/	/	/			/	B	/	/	/	/	/	/	/			/	/	B	/	/	/	/	/	/	/
/	/	C	/	/	/	/	/	/	/		/	/	C	/	/	/	/	/	/	/		/	/	C	/	/	/	/	/	/	/			/	/	C	/	/	/	/	/	/	/
∆kilA	∆3105	D	0.4001	0.3837	0.3939	0.3744	0.388025	0.3417	911.2		/	/	D	/	/	/	/	/	/	/		/	/	D	/	/	/	/	/	/	/			∆kilA	∆3105	D	0.4796	0.4331	0.4106	0.3849	0.42705	0.366025	563.115
∆kilC	∆3106	E	0.0634	0.0609	0.058	0.0616	0.060975	0.01465	39.0667		∆kilA	∆3105	E	0.7086	0.6378	0.5881	0.5488	0.620825	0.57065	913.04		∆kilA	∆3105	E	0.6334	0.5004	0.5505	0.4951	0.54485	0.493675	789.88			∆kilC	∆3106	E	0.0836	0.0845	0.0864	0.0823	0.0842	0.023175	35.6538
∆kilF	∆3107	F	0.0608	0.0563	0.0539	0.0554	0.0566	0.010275	27.4		∆kilC	∆3106	F	0.0966	0.0883	0.0891	0.0845	0.089625	0.03945	63.12		∆kilC	∆3106	F	0.1168	0.0942	0.0888	0.0858	0.0964	0.045225	72.36			∆kilF	∆3107	F	0.0778	0.0826	0.0879	0.0871	0.08385	0.022825	35.1154
∆kilD	∆3108	G	0.0669	0.0687	0.0664	0.0692	0.0678	0.021475	57.2667		∆kilF	∆3107	G	0.0742	0.0679	0.0721	0.0811	0.073825	0.02365	37.84		∆kilF	∆3107	G	0.0919	0.0825	0.0794	0.0743	0.082025	0.03085	49.36			∆kilD	∆3108	G	0.0973	0.104	0.1108	0.1067	0.1047	0.043675	67.1923
∆kilACF	∆3105-07 _1	H	0.0714	0.0635	0.0619	0.0679	0.066175	0.01985	52.9333		∆kilD	∆3108	H	0.0991	0.0905	0.0956	0.0926	0.09445	0.044275	70.84		∆kilD	∆3108	H	0.095	0.0982	0.0943	0.0908	0.094575	0.0434	69.44			∆kilACF	∆3105-07	H	0.0902	0.0728	0.0718	0.0857	0.080125	0.0191	29.3846
			5	6	7	8								5	6	7	8								5	6	7	8									5	6	7	8
∆kilACF	∆3105-07 _2	A	0.0621	0.0635	0.0587	0.0607	0.06125	0.014925	39.8		∆kilACF	∆3105-07	A	0.0754	0.0846	0.0707	0.0714	0.075525	0.02535	40.56		∆kilACF	∆3105-07	A	0.0681	0.0676	0.063	0.0586	0.064325	0.01315	21.04			∆kilH	∆4650	A	0.0894	0.0859	0.092	0.0891	0.0891	0.028075	43.1923
∆kilH	∆4650	B	0.0699	0.0614	0.0598	0.0657	0.0642	0.017875	47.6667		∆kilH	∆4650	B	0.0882	0.091	0.0849	0.0759	0.085	0.034825	55.72		∆kilH	∆4650	B	0.0959	0.0975	0.0831	0.0798	0.089075	0.0379	60.64			∆kilI	∆4651	B	0.11	0.1051	0.1065	0.1067	0.107075	0.04605	70.8462
∆kilG	∆4651_1	C	0.0808	0.0779	0.075	0.0705	0.07605	0.029725	79.2667		∆kilG	∆4651	C	0.0573	0.0653	0.0694	0.0594	0.06285	0.012675	20.28		∆kilI	∆4651	C	0.1251	0.1067	0.092	0.094	0.10445	0.053275	85.24			∆kilJ	∆4652	C	0.0827	0.0808	0.0826	0.0841	0.08255	0.021525	33.1154
∆kilG	∆4651_2	D	0.0607	0.0616	0.0876	0.0592	0.067275	0.02095	55.8667		∆kilJ	∆4652	D	0.0774	0.0774	0.0754	0.0723	0.075625	0.02545	40.72		∆kilJ	∆4652	D	0.0776	0.0666	0.0651	0.0748	0.071025	0.01985	31.76			∆kilK	∆4655	D	0.29	0.2981	0.34	0.3429	0.31775	0.256725	394.962
∆kilB	∆4652_1	E	0.067	0.057	0.0542	0.0569	0.058775	0.01245	33.2		∆kilK	∆4655	E	0.2585	0.2149	0.1855	0.1873	0.21155	0.161375	258.2		∆kilK	∆4655	E	0.383	0.2977	0.2589	0.2306	0.29255	0.241375	386.2			∆kilL	∆4658	E	0.4187	0.4256	0.4472	0.4822	0.443425	0.3824	588.308
∆kilB	∆4652_2	F	0.056	0.0625	0.0575	0.0567	0.058175	0.01185	31.6		∆kilL	∆4658	F	0.6108	0.5229	0.4814	0.4865	0.5254	0.475225	760.36		∆kilL	∆4658	F	0.4866	0.3784	0.2918	0.3061	0.365725	0.31455	503.28			∆kilM	∆4660	F	0.3395	0.3382	0.3577	0.4372	0.36815	0.307125	472.5
∆kilK	∆4655	G	0.2617	0.3225	0.3371	0.3273	0.31215	0.265825	708.867		∆kilM	∆4660	G	0.712	0.6104	0.5457	0.5935	0.6154	0.565225	904.36		∆kilM	∆4660	G	0.4741	0.383	0.3193	0.3835	0.389975	0.3388	542.08			∆kilKL	∆4655-4658	G	0.1549	0.1526	0.1679	0.1938	0.1673	0.106275	163.5
∆kilL	∆4658	H	0.5069	0.4987	0.5224	0.5093	0.509325	0.463	1234.67		∆kilKL	∆4655-4658	H	0.2695	0.229	0.1979	0.187	0.22085	0.170675	273.08		∆kilKL	∆4655-4658	H	0.2969	0.2551	0.2419	0.267	0.265225	0.21405	342.48			∆kilKLM	∆4655/58/60	H	0.2902	0.2861	0.3169	0.3513	0.311125	0.2501	384.769
			9	10	11	12								9	10	11	12								9	10	11	12									9	10	11	12
∆kilM	∆4660	A	0.6242	0.5885	0.5846	0.6057	0.60075	0.554425	1478.47		∆kilKLM	∆4655/58/60	A	0.1853	0.1621	0.1498	0.1553	0.163125	0.11295	180.72		∆kilKLM	∆4655/58/60	A	0.1648	0.1414	0.1395	0.1464	0.148025	0.09685	154.96				/	A	/	/	/	/	/	/	/
∆kilKL	∆4655-4658	B	0.329	0.3208	0.2958	0.3165	0.315525	0.2692	717.867			CF (blank)	B	0.0488	0.0508	0.0501	0.051	0.050175	0	0			/	B	/	/	/	/	/	/	/				/	B	/	/	/	/	/	/	/
∆kilKLM	∆4655/58/60	C	0.2409	0.2531	0.2645	0.2949	0.26335	0.217025	578.733			Mx (alone)	C	0.051	0.0516	0.0508	0.0505	0.050975	0.0008	1.28			/	C	/	/	/	/	/	/	/				CF (blank)	C	0.0603	0.0611	0.0601	0.0626	0.061025	0	0
	CF (blank)	D	0.0457	0.0459	0.047	0.0467	0.046325	0	0			Ec (alone)	D	0.085	0.0875	0.0868	0.0823	0.0854	0.035225	56.36			CF (blank)	D	0.0596	0.0483	0.0478	0.049	0.051175	0	0				Mx alone	D	0.0657	0.0564	0.0509	0.1042	0.0693	0.008275	12.7308
	Mx alone	E	0.0548	0.0486	0.0506	0.051	0.05125	0.004925	13.1333														Mx alone	E	0.053	0.0475	0.0586	0.0486	0.051925	0.00075	1.2				/	E	/	/	/	/	/	/	/
	Ec alone	F	0.0856	0.0826	0.0859	0.1022	0.089075	0.04275	114														Ec alone	F	0.0761	0.078	0.083	0.0782	0.078825	0.02765	44.24				/	F	/	/	/	/	/	/	/
																																			/	G	/	/	/	/	/	/	/
																																			Ec alone	H	0.0785	0.078	0.0732	0.085	0.078675	0.01765	27.1538
in 96-well plate
100 µl E. coli OD600= 10
100 µl M. xanthus OD600= 0.5
24 h incubation
