# Supplementary material for: A Tad-like apparatus is required for contact-dependent prey killing in predatory social bacteria
Source: eLife. 2021 Sep 10;10:e72409. doi: 10.7554/eLife.72409 (PMC8460266; doi:10.7554/eLife.72409)
Supplement: Figure 3—source data 2. [file elife-72409-fig3-data2.xlsx]

## Sheet: Predation with WT M. xanthus
	Predation with wild-type M. xanthus (experiment 1)									Predation with wild-type M. xanthus (experiment 2)									Predation with wild-type M. xanthus (experiment 3)									Predation with wild-type M. xanthus (experiment 4)									Predation with wild-type M. xanthus (experiment 5)											E. coli cell #	Contacts with Myxo
	E. coli cell #	Contacts with Myxo	Total Pauses	KilG-nG clusters	KilG-nG cluster + pause	Lysis ?	Lysis + KilG cluster	Lysis + KilG cluster and pause		E. coli cell #	Contacts with Myxo	Total Pauses	KilG-nG clusters	KilG-nG cluster + pause	Lysis ?	Lysis + KilG cluster	Lysis + KilG cluster and pause		E. coli cell #	Contacts with Myxo	Total Pauses	KilG-nG clusters	KilG-nG cluster + pause	Lysis ?	Lysis + KilG cluster	Lysis + KilG cluster and pause		E. coli cell #	Contacts with Myxo	Total Pauses	KilG-nG clusters	KilG-nG cluster + pause	Lysis ?	Lysis + KilG cluster	Lysis + KilG cluster and pause		E. coli cell #	Contacts with Myxo	Total Pauses	KilG-nG clusters	KilG-nG cluster + pause	Lysis ?	Lysis + KilG cluster	Lysis + KilG cluster and pause			Exp 1	59	152
	1	4	0	1	0	1	1	0		1	4	1	0	0	0	0	0		1	2	1	1	1	1	1	1		1	9	0	0	0	0	0	0		1	1	0	0	0	0	0	0			Exp 2	66	108
	2	1	1	1	1	1	1	1		2	4	1	1	1	1	1	1		2	2	1	1	1	1	1	1		2	4	2	1	1	1	1	1		2	1	0	0	0	0	0	0			Exp 3	61	93
	3	3	1	1	1	1	1	1		3	1	1	1	1	1	1	1		3	4	1	1	1	0	0	0		3	3	0	0	0	0	0	0		3	6	1	1	1	1	1	1			Exp 4	79	236
	4	4	0	0	0	1	0	0		4	1	0	0	0	0	0	0		4	1	1	0	0	1	0	0		4	2	0	0	0	0	0	0		4	1	1	1	1	1	1	1			Exp 5	58	218
	5	1	1	0	0	1	0	0		5	1	1	1	1	1	1	1		5	1	1	1	1	1	1	1		5	5	1	1	1	0	0	0		5	6	0	0	0	0	0	0			TOTAL	323	807
	6	1	0	0	0	1	0	0		6	2	2	2	1	1	1	1		6	2	1	2	1	1	1	1		6	2	1	1	1	1	1	1		6	6	0	0	0	1	0	0
	7	16	1	1	1	1	1	1		7	1	1	1	1	0	0	0		7	2	2	0	0	1	0	0		7	7	0	0	0	1	0	0		7	5	1	1	1	1	1	1
	8	1	1	1	1	1	1	1		8	4	0	1	0	0	0	0		8	1	1	1	1	1	1	1		8	2	1	0	0	1	0	0		8	6	0	0	0	0	0	0
	9	2	0	0	0	0	0	0		9	2	1	0	0	0	0	0		9	1	1	1	1	1	1	1		9	2	1	1	1	1	1	1		9	6	1	2	1	1	1	1					Exp 1
	10	3	1	0	0	0	0	0		10	2	0	0	0	0	0	0		10	1	1	0	0	1	0	0		10	1	1	1	1	1	1	1		10	1	1	0	0	1	0	0				% contacts leading to motility pause	34.2105
	11	5	1	1	0	1	1	0		11	2	2	1	1	1	1	1		11	2	1	0	0	1	0	0		11	2	1	1	1	1	1	1		11	2	1	1	1	1	1	1				% contacts leading to KilG cluster formation	32.8947
	12	8	0	1	0	1	1	0		12	3	2	2	2	1	1	1		12	2	1	2	1	1	1	1		12	2	1	1	1	1	1	1		12	11	1	1	1	1	1	1				% contacts leading to cell lysis	31.5789
	13	1	1	1	1	1	1	1		13	3	1	1	1	1	1	1		13	1	0	0	0	0	0	0		13	2	1	1	1	1	1	1		13	4	0	1	0	0	0	0				% KilG clusters associated with motility pause	72
	14	1	1	1	1	1	1	1		14	1	1	0	0	0	0	0		14	1	1	0	0	1	0	0		14	4	0	1	0	1	1	0		14	8	1	1	1	1	1	1				% KilG clusters leading to cell lysis	74
	15	2	2	2	2	1	1	1		15	1	1	1	1	1	1	1		15	1	1	0	0	1	0	0		15	1	0	0	0	0	0	0		15	6	0	0	0	0	0	0				% KilG clusters associated with pause leading to cell lysis	83.3333
	16	2	2	2	2	1	1	1		16	1	1	1	1	1	1	1		16	2	0	0	0	0	0	0		16	6	2	1	1	1	1	1		16	2	2	1	1	1	1	1
	17	1	1	1	1	1	1	1		17	1	1	0	0	0	0	0		17	2	0	0	0	0	0	0		17	3	0	0	0	1	0	0		17	2	1	1	1	1	1	1
	18	1	1	0	0	1	0	0		18	1	1	0	0	0	0	0		18	2	0	1	0	0	0	0		18	1	1	1	1	1	1	1		18	3	1	2	2	1	1	1
	19	3	0	0	0	1	0	0		19	1	1	0	0	1	0	0		19	2	1	1	1	1	1	1		19	10	0	0	0	0	0	0		19	3	0	0	0	0	0	0
	20	1	1	0	0	1	0	0		20	2	0	0	0	1	0	0		20	4	0	0	0	1	0	0		20	1	1	0	0	0	0	0		20	3	0	1	0	0	0	0
	21	1	1	0	0	1	0	0		21	4	1	0	0	0	0	0		21	1	0	0	0	0	0	0		21	1	1	1	1	1	1	1		21	1	0	0	0	0	0	0
	22	1	1	0	0	1	0	0		22	2	1	0	0	0	0	0		22	4	1	1	1	1	1	1		22	1	0	0	0	0	0	0		22	4	0	1	0	1	1	0
	23	1	1	1	1	1	1	1		23	2	1	1	1	1	1	1		23	1	1	1	1	1	1	1		23	2	1	1	1	1	1	1		23	2	1	1	1	1	1	1
	24	4	1	1	1	1	1	1		24	1	1	1	1	1	1	1		24	1	1	0	0	1	0	0		24	2	0	0	0	0	0	0		24	1	1	1	1	1	1	1
	25	1	0	1	0	1	1	0		25	1	1	1	1	1	1	1		25	1	0	1	0	1	1	0		25	1	0	0	0	0	0	0		25	8	1	0	0	0	0	0
	26	5	2	3	1	1	1	1		26	1	1	1	1	1	1	1		26	1	1	1	1	1	1	1		26	1	1	1	1	1	1	1		26	8	1	1	1	1	1	1
	27	3	1	2	1	1	1	1		27	2	1	1	1	1	1	1		27	1	0	0	0	0	0	0		27	3	0	1	0	0	0	0		27	12	1	1	1	1	1	1
	28	3	0	0	0	1	0	0		28	2	0	0	0	0	0	0		28	1	0	0	0	0	0	0		28	1	1	1	1	1	1	1		28	1	1	1	1	1	1	1
	29	5	2	2	2	1	1	1		29	1	0	0	0	0	0	0		29	1	1	1	1	0	0	0		29	1	0	1	0	1	1	0		29	1	1	1	1	1	1	1
	30	3	2	1	0	1	1	0		30	1	0	0	0	0	0	0		30	1	1	1	1	1	1	1		30	3	0	0	0	0	0	0		30	2	0	0	0	0	0	0
	31	4	0	1	0	1	1	0		31	5	0	1	0	0	0	0		31	1	1	1	1	1	1	1		31	4	0	0	0	0	0	0		31	2	1	1	1	1	1	1
	32	1	1	1	1	1	1	1		32	1	1	0	0	0	0	0		32	1	1	1	1	1	1	1		32	10	0	0	0	0	0	0		32	3	0	0	0	0	0	0
	33	2	2	1	1	1	1	1		33	1	0	0	0	0	0	0		33	1	1	1	1	1	1	1		33	2	0	0	0	0	0	0		33	5	0	0	0	0	0	0
	34	1	1	1	1	1	1	1		34	1	1	1	1	1	1	1		34	1	1	1	1	1	1	1		34	1	1	1	1	1	1	1		34	5	0	0	0	0	0	0
	35	3	2	1	1	1	1	1		35	2	0	0	0	0	0	0		35	3	0	1	0	0	0	0		35	2	0	0	0	0	0	0		35	1	1	1	1	1	1	1
	36	1	1	1	1	1	1	1		36	1	0	0	0	0	0	0		36	3	0	1	0	1	1	0		36	7	0	0	0	0	0	0		36	4	0	0	0	0	0	0
	37	1	0	0	0	1	0	0		37	2	0	0	0	0	0	0		37	4	0	0	0	0	0	0		37	4	0	0	0	0	0	0		37	4	0	0	0	0	0	0
	38	2	2	1	1	1	1	1		38	2	0	1	0	0	0	0		38	2	1	1	1	1	1	1		38	1	1	1	1	1	1	1		38	1	1	1	1	1	1	1
	39	1	1	1	1	1	1	1		39	1	1	2	2	1	1	1		39	3	0	0	0	0	0	0		39	8	1	1	0	0	0	0		39	1	1	0	0	1	0	0
	40	1	1	1	1	1	1	1		40	2	0	0	0	0	0	0		40	1	1	1	1	1	1	1		40	3	0	0	0	0	0	0		40	4	0	0	0	0	0	0
	41	3	2	1	1	1	1	1		41	1	1	0	0	1	0	0		41	1	1	1	1	1	1	1		41	6	0	0	0	0	0	0		41	5	0	0	0	0	0	0
	42	1	1	1	1	1	1	1		42	1	1	0	0	0	0	0		42	1	1	1	1	1	1	1		42	2	0	0	0	0	0	0		42	7	0	0	0	0	0	0
	43	4	0	0	0	1	0	0		43	1	0	0	0	0	0	0		43	1	1	0	0	1	0	0		43	2	0	0	0	0	0	0		43	5	0	0	0	0	0	0
	44	4	1	2	1	1	1	1		44	1	0	0	0	0	0	0		44	1	1	0	0	0	0	0		44	1	0	0	0	0	0	0		44	1	0	0	0	0	0	0
	45	3	1	2	1	1	1	1		45	1	1	1	1	1	1	1		45	1	0	0	0	0	0	0		45	1	0	0	0	0	0	0		45	5	0	1	0	1	1	1
	46	5	2	3	2	1	1	1		46	1	1	1	1	1	1	1		46	2	1	1	1	1	1	1		46	1	0	0	0	0	0	0		46	3	0	1	0	1	1	1
	47	5	1	1	1	1	1	1		47	1	0	0	0	0	0	0		47	1	0	0	0	0	0	0		47	4	1	2	1	1	1	1		47	2	0	0	0	0	0	0
	48	1	0	1	0	0	0	0		48	1	1	0	0	0	0	0		48	1	1	1	1	1	1	1		48	3	1	1	1	1	1	1		48	3	0	0	0	0	0	0
	49	2	0	0	0	0	0	0		49	1	1	0	0	0	0	0		49	1	1	1	1	1	1	1		49	3	0	0	0	0	0	0		49	2	1	1	1	1	1	1
	50	1	0	0	0	0	0	0		50	1	1	1	1	1	1	1		50	2	1	1	1	1	1	1		50	1	0	0	0	0	0	0		50	4	0	0	0	0	0	0
	51	4	1	1	1	1	1	1		51	1	1	1	1	1	1	1		51	1	1	1	1	1	1	1		51	2	0	0	0	0	0	0		51	1	0	0	0	0	0	0
	52	1	1	1	1	1	1	1		52	2	1	2	1	0	0	0		52	1	1	1	1	1	1	1		52	2	0	0	0	0	0	0		52	1	0	0	0	0	0	0
	53	2	2	2	2	0	0	0		53	1	1	1	1	1	1	1		53	2	0	0	0	0	0	0		53	1	1	1	1	1	1	1		53	3	2	2	2	1	1	1
	54	4	0	0	0	0	0	0		54	4	0	0	0	0	0	0		54	1	1	1	1	1	1	1		54	2	0	0	0	0	0	0		54	3	0	0	0	0	0	0
	55	2	0	0	0	0	0	0		55	1	0	0	0	0	0	0		55	1	1	1	1	1	1	1		55	2	1	0	0	0	0	0		55	4	0	0	0	0	0	0
	56	1	0	1	0	1	1	0		56	1	1	1	1	1	1	1		56	1	1	1	1	1	1	1		56	2	0	0	0	0	0	0		56	7	1	1	1	1	1	1
	57	1	1	0	0	0	0	0		57	1	0	0	0	0	0	0		57	1	0	0	0	0	0	0		57	1	0	0	0	0	0	0		57	4	0	0	0	0	0	0
	58	1	1	0	0	0	0	0		58	2	1	1	1	0	0	0		58	1	1	1	1	1	1	1		58	2	1	0	0	0	0	0		58	5	0	0	0	0	0	0
	59	2	0	0	0	0	0	0		59	2	1	1	1	0	0	0		59	1	0	0	0	0	0	0		59	1	1	1	1	1	1	1	TOTAL	58	218	27	30	24	28	25	24
TOTAL	59	152	52	50	36	48	37	30		60	1	1	1	1	1	1	1		60	1	0	0	0	0	0	0		60	3	2	2	2	1	1	1
										61	2	1	2	2	0	0	0		61	1	0	0	0	0	0	0		61	12	0	0	0	0	0	0
										62	2	2	2	1	1	1	1	TOTAL	61	93	42	38	32	41	32	30		62	2	0	0	0	0	0	0
										63	1	1	1	1	1	1	1											63	5	1	1	1	1	1	1
										64	1	1	0	0	0	0	0											64	3	0	1	0	0	0	0
										65	1	1	1	1	1	1	1											65	2	1	1	1	1	1	1
										66	2	1	1	1	1	1	1											66	1	0	0	0	0	0	0
									TOTAL	66	108	50	41	35	30	27	27											67	5	0	0	0	0	0	0
																												68	6	1	1	1	1	1	1
																												69	4	1	1	1	1	1	1
																												70	3	1	1	1	1	1	1
																												71	2	0	0	0	0	0	0
																												72	5	1	1	1	1	1	1
																												73	2	1	0	0	0	0	0
																												74	1	1	1	1	1	1	1
																												75	3	0	0	0	0	0	0
																												76	4	0	0	0	0	0	0
																												77	2	1	1	1	1	1	1
																												78	3	1	1	0	1	1	0
																												79	2	2	2	2	1	1	1
																											TOTAL	79	236	41	39	32	35	32	29
[truncated: 6 more columns]

## Sheet: Predation with ∆kilC (∆3106)
	Predation with ∆kilC (mxan_3106) M. xanthus (experiment 1)									Predation with ∆kilC (mxan_3106) M. xanthus (experiment 2)									Predation with ∆kilC (mxan_3106) M. xanthus (experiment 3)									Predation with ∆kilC (mxan_3106) M. xanthus (experiment 4)									Predation with ∆kilC (mxan_3106) M. xanthus (experiment 5)											E. coli cell #	Contacts with Myxo
	E. coli cell #	Contacts with Myxo	Total Pauses	KilD-nG clusters	KilD-nG cluster + pause	Lysis ?	Lysis + KilD-nG cluster	Lysis + KilD-nG cluster and pause		E. coli cell #	Contacts with Myxo	Total Pauses	KilD-nG clusters	KilD-nG cluster + pause	Lysis ?	Lysis + KilD-nG cluster	Lysis + KilD-nG cluster and pause		E. coli cell #	Contacts with Myxo	Total Pauses	KilD-nG clusters	KilD-nG cluster + pause	Lysis ?	Lysis + KilD-nG cluster	Lysis + KilD-nG cluster and pause		E. coli cell #	Contacts with Myxo	Total Pauses	KilD-nG clusters	KilD-nG cluster + pause	Lysis ?	Lysis + KilD-nG cluster	Lysis + KilD-nG cluster and pause		E. coli cell #	Contacts with Myxo	Total Pauses	KilD-nG clusters	KilD-nG cluster + pause	Lysis ?	Lysis + KilD-nG cluster	Lysis + KilD-nG cluster and pause			Exp 1	64	165
	1	2	1	0	0	0	0	0		1	4	1	2	2	0	0	0		1	6	1	0	0	0	0	0		1	6	0	1	0	0	0	0		1	6	0	0	0	0	0	0			Exp 2	82	261
	2	1	0	0	0	0	0	0		2	4	0	1	0	0	0	0		2	9	0	0	0	0	0	0		2	4	0	3	0	0	0	0		2	4	0	1	0	0	0	0			Exp 3	100	706
	3	2	1	0	0	0	0	0		3	2	0	1	0	0	0	0		3	17	0	2	0	0	0	0		3	6	1	4	2	0	0	0		3	3	0	2	0	0	0	0			Exp 4	109	322
	4	5	0	0	0	0	0	0		4	4	1	1	1	0	0	0		4	15	0	3	0	0	0	0		4	6	0	3	0	0	0	0		4	1	0	1	0	0	0	0			Exp 5	66	326
	5	2	1	2	1	0	0	0		5	1	0	1	0	0	0	0		5	11	0	0	0	0	0	0		5	9	0	6	0	0	0	0		5	15	0	0	0	0	0	0			TOTAL	421	1780
	6	1	0	0	0	0	0	0		6	1	0	0	0	0	0	0		6	14	0	0	0	0	0	0		6	6	0	2	0	0	0	0		6	17	0	0	0	0	0	0
	7	1	0	0	0	0	0	0		7	3	0	1	0	0	0	0		7	15	0	1	0	0	0	0		7	5	1	2	1	0	0	0		7	15	0	0	0	0	0	0
	8	1	0	0	0	0	0	0		8	8	1	0	0	0	0	0		8	8	0	0	0	0	0	0		8	8	0	5	0	0	0	0		8	18	0	0	0	0	0	0
	9	1	0	0	0	0	0	0		9	1	0	0	0	0	0	0		9	7	0	1	0	0	0	0		9	6	0	1	0	0	0	0		9	4	0	2	0	0	0	0					Exp 1
	10	2	2	0	0	0	0	0		10	1	0	0	0	0	0	0		10	6	0	1	0	0	0	0		10	4	1	1	1	0	0	0		10	4	1	3	1	0	0	0				% contacts leading to motility pause	15.1515
	11	2	2	2	1	0	0	0		11	2	0	1	0	0	0	0		11	4	0	1	0	0	0	0		11	2	0	1	0	0	0	0		11	1	0	0	0	0	0	0				% contacts leading to KilD cluster formation	7.87879
	12	2	0	0	0	0	0	0		12	1	1	1	1	0	0	0		12	5	0	0	0	0	0	0		12	1	0	0	0	0	0	0		12	4	1	1	1	0	0	0				% contacts leading to cell lysis	0
	13	3	0	0	0	0	0	0		13	2	1	3	1	0	0	0		13	9	0	4	0	0	0	0		13	1	0	1	0	0	0	0		13	4	1	1	1	0	0	0				% KilD clusters associated with motility pause	30.7692
	14	5	0	0	0	0	0	0		14	1	1	1	1	0	0	0		14	7	2	1	1	1	1	1		14	8	0	1	0	0	0	0		14	4	1	1	1	1	1	1				% KilD clusters leading to cell lysis	0
	15	4	0	0	0	0	0	0		15	1	0	0	0	0	0	0		15	6	0	1	0	0	0	0		15	7	2	2	2	0	0	0		15	5	2	0	0	0	0	0				% KilD clusters associated with pause leading to cell lysis	0
	16	5	0	0	0	0	0	0		16	2	0	0	0	0	0	0		16	9	0	0	0	0	0	0		16	3	0	2	0	0	0	0		16	13	0	1	0	0	0	0
	17	1	0	0	0	0	0	0		17	3	0	0	0	0	0	0		17	17	0	0	0	0	0	0		17	3	0	1	0	0	0	0		17	5	0	0	0	0	0	0
	18	3	1	0	0	0	0	0		18	3	0	0	0	0	0	0		18	8	1	1	1	0	0	0		18	4	1	2	0	0	0	0		18	3	0	0	0	0	0	0
	19	3	1	0	0	0	0	0		19	2	1	0	0	0	0	0		19	5	2	2	1	0	0	0		19	3	0	3	0	0	0	0		19	6	0	0	0	0	0	0
	20	2	2	2	1	0	0	0		20	5	1	0	0	0	0	0		20	6	1	3	1	0	0	0		20	1	0	1	0	0	0	0		20	7	0	0	0	0	0	0
	21	3	0	0	0	0	0	0		21	3	0	0	0	0	0	0		21	5	1	1	1	1	1	1		21	4	0	1	0	0	0	0		21	4	0	0	0	0	0	0
	22	2	0	0	0	0	0	0		22	5	0	0	0	0	0	0		22	2	0	1	0	0	0	0		22	4	0	2	0	0	0	0		22	15	1	3	1	0	0	0
	23	1	0	0	0	0	0	0		23	7	0	0	0	0	0	0		23	1	0	0	0	0	0	0		23	5	0	0	0	0	0	0		23	1	1	1	1	0	0	0
	24	1	0	0	0	0	0	0		24	1	1	1	1	0	0	0		24	5	0	0	0	0	0	0		24	3	0	0	0	0	0	0		24	9	0	1	0	0	0	0
	25	1	0	0	0	0	0	0		25	1	0	0	0	0	0	0		25	5	0	0	0	0	0	0		25	9	0	1	0	0	0	0		25	2	0	2	0	0	0	0
	26	2	0	0	0	0	0	0		26	3	1	1	0	0	0	0		26	4	0	0	0	0	0	0		26	6	1	5	0	0	0	0		26	2	0	0	0	0	0	0
	27	1	0	0	0	0	0	0		27	2	0	1	0	0	0	0		27	2	0	0	0	0	0	0		27	1	1	1	0	0	0	0		27	2	0	0	0	0	0	0
	28	1	0	0	0	0	0	0		28	1	0	0	0	0	0	0		28	4	0	1	0	0	0	0		28	2	0	0	0	0	0	0		28	5	1	1	1	0	0	0
	29	1	1	2	1	0	0	0		29	1	0	0	0	0	0	0		29	4	0	0	0	0	0	0		29	1	0	0	0	0	0	0		29	5	1	0	0	0	0	0
	30	1	1	0	0	0	0	0		30	1	1	0	0	0	0	0		30	4	0	0	0	0	0	0		30	1	1	2	0	0	0	0		30	4	1	1	0	0	0	0
	31	1	0	0	0	0	0	0		31	2	1	1	1	0	0	0		31	3	2	4	1	1	1	1		31	1	0	0	0	0	0	0		31	1	0	0	0	0	0	0
	32	2	0	1	0	0	0	0		32	5	2	0	0	0	0	0		32	10	1	4	2	0	0	0		32	2	0	1	0	0	0	0		32	1	0	1	0	0	0	0
	33	1	0	0	0	0	0	0		33	3	1	2	1	0	0	0		33	3	0	0	0	0	0	0		33	1	0	0	0	0	0	0		33	3	0	0	0	0	0	0
	34	1	0	0	0	0	0	0		34	3	0	1	0	0	0	0		34	2	0	2	0	0	0	0		34	2	0	0	0	0	0	0		34	3	0	0	0	0	0	0
	35	1	0	0	0	0	0	0		35	4	1	1	1	0	0	0		35	6	0	0	0	0	0	0		35	2	0	1	0	0	0	0		35	5	0	1	0	0	0	0
	36	1	0	0	0	0	0	0		36	5	0	2	0	0	0	0		36	4	0	1	0	0	0	0		36	2	0	0	0	0	0	0		36	1	0	0	0	0	0	0
	37	4	0	0	0	0	0	0		37	3	0	1	0	0	0	0		37	2	0	0	0	0	0	0		37	5	0	2	0	0	0	0		37	1	1	1	1	0	0	0
	38	4	0	0	0	0	0	0		38	9	0	1	0	0	0	0		38	11	0	1	0	1	1	0		38	7	1	3	0	0	0	0		38	5	0	0	0	0	0	0
	39	5	2	0	0	0	0	0		39	1	1	1	1	0	0	0		39	6	0	1	0	0	0	0		39	1	1	1	1	1	1	1		39	1	0	0	0	0	0	0
	40	2	1	0	0	0	0	0		40	0	0	0	0	0	0	0		40	3	0	0	0	0	0	0		40	2	0	3	0	0	0	0		40	2	0	0	0	0	0	0
	41	6	0	0	0	0	0	0		41	1	1	1	1	0	0	0		41	5	0	2	0	0	0	0		41	5	1	1	0	0	0	0		41	2	0	0	0	0	0	0
	42	5	1	0	0	0	0	0		42	5	0	0	0	0	0	0		42	4	0	1	0	0	0	0		42	2	0	2	0	0	0	0		42	6	0	0	0	0	0	0
	43	3	2	0	0	0	0	0		43	5	0	1	0	0	0	0		43	19	0	0	0	0	0	0		43	1	0	0	0	0	0	0		43	4	0	0	0	0	0	0
	44	2	0	0	0	0	0	0		44	5	0	0	0	0	0	0		44	16	2	3	1	0	0	0		44	1	0	0	0	0	0	0		44	4	0	0	0	0	0	0
	45	2	1	0	0	0	0	0		45	4	0	1	0	0	0	0		45	3	0	1	0	0	0	0		45	1	0	0	0	0	0	0		45	2	0	0	0	0	0	0
	46	2	2	0	0	0	0	0		46	6	0	0	0	0	0	0		46	5	0	1	0	0	0	0		46	1	0	0	0	0	0	0		46	4	1	0	0	0	0	0
	47	4	0	0	0	0	0	0		47	5	0	0	0	0	0	0		47	3	0	0	0	0	0	0		47	1	0	0	0	0	0	0		47	6	1	0	0	0	0	0
	48	3	1	1	0	0	0	0		48	4	0	0	0	0	0	0		48	1	1	1	0	1	1	0		48	4	1	1	1	1	1	1		48	5	0	0	0	0	0	0
	49	4	1	0	0	0	0	0		49	2	0	0	0	0	0	0		49	3	0	1	0	0	0	0		49	4	0	0	0	0	0	0		49	8	0	0	0	0	0	0
	50	3	1	0	0	0	0	0		50	4	0	0	0	0	0	0		50	12	0	0	0	0	0	0		50	4	2	1	1	0	0	0		50	1	0	0	0	0	0	0
	51	4	0	0	0	0	0	0		51	7	1	1	1	0	0	0		51	12	0	0	0	0	0	0		51	3	1	2	2	1	1	1		51	8	0	3	0	0	0	0
	52	3	0	0	0	0	0	0		52	4	0	0	0	0	0	0		52	2	0	0	0	0	0	0		52	5	1	2	1	1	1	1		52	6	3	0	0	0	0	0
	53	2	0	0	0	0	0	0		53	5	0	0	0	0	0	0		53	11	0	0	0	0	0	0		53	4	0	1	0	0	0	0		53	3	2	1	0	0	0	0
	54	5	0	1	0	0	0	0		54	6	0	1	0	0	0	0		54	2	1	0	0	0	0	0		54	6	2	2	0	0	0	0		54	1	0	0	0	0	0	0
	55	5	0	0	0	0	0	0		55	1	1	1	0	0	0	0		55	11	0	0	0	0	0	0		55	4	2	1	1	1	1	1		55	1	0	0	0	0	0	0
	56	5	0	0	0	0	0	0		56	3	0	0	0	0	0	0		56	16	1	2	1	0	0	0		56	1	0	0	0	0	0	0		56	11	0	1	0	0	0	0
	57	5	0	1	0	0	0	0		57	2	0	1	0	0	0	0		57	7	1	1	1	0	0	0		57	3	0	0	0	0	0	0		57	9	0	1	0	0	0	0
	58	3	0	0	0	0	0	0		58	2	0	0	0	0	0	0		58	1	0	1	0	0	0	0		58	3	0	2	0	0	0	0		58	4	0	0	0	0	0	0
	59	3	0	0	0	0	0	0		59	1	1	0	0	0	0	0		59	6	0	0	0	0	0	0		59	1	0	0	0	0	0	0		59	2	0	0	0	0	0	0
	60	4	0	0	0	0	0	0		60	2	0	0	0	0	0	0		60	4	0	0	0	0	0	0		60	1	0	0	0	0	0	0		60	9	0	5	0	0	0	0
	61	2	0	0	0	0	0	0		61	3	1	1	1	0	0	0		61	10	0	5	0	0	0	0		61	1	0	0	0	0	0	0		61	7	0	3	0	0	0	0
	62	2	0	0	0	0	0	0		62	2	0	0	0	0	0	0		62	12	0	2	0	0	0	0		62	4	2	1	1	1	1	1		62	3	0	4	0	0	0	0
	63	3	0	0	0	0	0	0		63	3	0	0	0	0	0	0		63	4	1	2	1	1	1	1		63	2	1	0	0	0	0	0		63	2	0	0	0	0	0	0
	64	1	0	1	0	0	0	0		64	4	1	1	1	0	0	0		64	3	0	2	0	0	0	0		64	2	0	1	0	0	0	0		64	5	1	1	1	0	0	0
TOTAL	64	165	25	13	4	0	0	0		65	4	0	0	0	0	0	0		65	3	0	0	0	0	0	0		65	1	0	0	0	0	0	0		65	1	1	1	1	0	0	0
										66	4	0	0	0	0	0	0		66	6	0	1	0	0	0	0		66	2	0	2	0	0	0	0		66	1	1	0	0	0	0	0
										67	4	0	1	0	0	0	0		67	13	0	2	0	0	0	0		67	1	1	1	1	0	0	0	TOTAL	66	326	22	45	10	1	1	1
										68	4	0	0	0	0	0	0		68	9	0	1	0	0	0	0		68	1	1	0	0	1	0	0
										69	3	0	0	0	0	0	0		69	11	0	1	0	0	0	0		69	1	1	1	0	0	0	0
										70	2	0	0	0	0	0	0		70	6	1	0	0	0	0	0		70	1	1	1	0	1	1	0
										71	7	0	1	0	0	0	0		71	5	1	0	0	1	0	0		71	1	0	1	0	0	0	0
										72	2	0	0	0	0	0	0		72	2	0	0	0	0	0	0		72	1	0	0	0	0	0	0
										73	3	0	1	0	0	0	0		73	12	1	1	1	0	0	0		73	3	0	2	0	0	0	0
										74	3	0	0	0	0	0	0		74	12	0	1	0	0	0	0		74	2	0	0	0	0	0	0
										75	2	1	0	0	0	0	0		75	8	1	1	1	1	1	1		75	1	0	0	0	0	0	0
										76	3	0	0	0	0	0	0		76	11	0	0	0	0	0	0		76	1	0	1	0	0	0	0
										77	1	0	1	0	0	0	0		77	15	0	1	0	0	0	0		77	1	0	1	0	0	0	0
										78	2	0	0	0	0	0	0		78	7	1	1	1	0	0	0		78	1	0	0	0	0	0	0
										79	10	0	1	0	0	0	0		79	9	0	2	0	0	0	0		79	1	0	0	0	0	0	0
										80	2	1	1	1	0	0	0		80	13	1	3	0	0	0	0		80	2	0	0	0	0	0	0
										81	2	1	1	1	0	0	0		81	6	1	0	0	0	0	0		81	2	1	1	1	1	1	1
										82	6	0	0	0	0	0	0		82	2	0	0	0	0	0	0		82	7	3	2	2	1	1	1
									TOTAL	82	261	26	42	17	0	0	0		83	1	0	0	0	0	0	0		83	3	1	1	1	1	1	1
																			84	1	1	1	1	1	1	1		84	2	2	1	1	1	1	1
																			85	1	1	1	1	1	1	1		85	2	2	1	0	0	0	0
																			86	4	1	3	2	1	1	1		86	1	1	1	1	1	1	1
																			87	6	1	2	1	0	0	0		87	1	1	1	1	0	0	0
																			88	8	2	2	1	1	1	1		88	4	0	0	0	0	0	0
																			89	1	0	0	0	0	0	0		89	2	0	0	0	0	0	0
																			90	3	0	1	0	0	0	0		90	2	1	1	1	1	1	1
																			91	9	0	0	0	0	0	0		91	4	1	1	1	1	1	1
																			92	7	0	0	0	0	0	0		92	1	1	1	1	1	1	1
																			93	6	1	1	0	1	1	0		93	3	1	3	1	0	0	0
																			94	10	1	1	1	0	0	0		94	6	0	2	0	0	0	0
																			95	14	0	3	0	0	0	0		95	3	0	0	0	0	0	0
																			96	14	0	4	0	0	0	0		96	1	1	2	2	0	0	0
																			97	4	0	1	0	0	0	0		97	1	1	1	0	0	0	0
																			98	1	0	1	0	0	0	0		98	2	0	0	0	0	0	0
																			99	19	1	1	1	0	0	0		99	4	0	1	0	0	0	0
																			100	5	1	2	1	1	1	1		100	5	0	1	0	0	0	0
																		TOTAL	100	706	35	101	24	14	13	10		101	1	0	1	0	0	0	0
																												102	2	0	0	0	0	0	0
																												103	1	0	0	0	0	0	0
																												104	3	0	0	0	0	0	0
																												105	4	0	0	0	0	0	0
																												106	5	0	0	0	0	0	0
																												107	7	0	3	0	0	0	0
																												108	2	0	1	0	0	0	0
																												109	2	0	1	0	0	0	0
																											TOTAL	109	322	45	119	28	16	15	14
[truncated: 6 more columns]

## Sheet: Predation with ∆kilH (∆4650)
	Predation with ∆kilH (mxan_4650) M. xanthus (experiment 1)									Predation with ∆kilH (mxan_4650) M. xanthus (experiment 2)									Predation with ∆kilH (mxan_4650) M. xanthus (experiment 3)									Predation with ∆kilH (mxan_4650) M. xanthus (experiment 4)									Predation with ∆kilH (mxan_4650) M. xanthus (experiment 5)											E. coli cell #	Contacts with Myxo
	E. coli cell #	Contacts with Myxo	Total Pauses	KilD-nG clusters	KilD-nG cluster + pause	Lysis ?	Lysis + KilD-nG cluster	Lysis + KilD-nG cluster and pause		E. coli cell #	Contacts with Myxo	Total Pauses	KilD-nG clusters	KilD-nG cluster + pause	Lysis ?	Lysis + KilD-nG cluster	Lysis + KilD-nG cluster and pause		E. coli cell #	Contacts with Myxo	Total Pauses	KilD-nG clusters	KilD-nG cluster + pause	Lysis ?	Lysis + KilD-nG cluster	Lysis + KilD-nG cluster and pause		E. coli cell #	Contacts with Myxo	Total Pauses	KilD-nG clusters	KilD-nG cluster + pause	Lysis ?	Lysis + KilD-nG cluster	Lysis + KilD-nG cluster and pause		E. coli cell #	Contacts with Myxo	Total Pauses	KilD-nG clusters	KilD-nG cluster + pause	Lysis ?	Lysis + KilD-nG cluster	Lysis + KilD-nG cluster and pause			Exp 1	88	438
	1	6	0	0	0	0	0	0		1	5	1	1	1	0	0	0		1	6	1	0	0	0	0	0		1	3	1	0	0	0	0	0		1	3	0	5	0	0	0	0			Exp 2	56	141
	2	7	1	5	1	0	0	0		2	2	0	0	0	0	0	0		2	2	0	0	0	0	0	0		2	7	0	1	0	0	0	0		2	2	2	1	0	0	0	0			Exp 3	82	301
	3	6	1	1	1	0	0	0		3	1	0	0	0	0	0	0		3	6	0	0	0	0	0	0		3	5	1	1	1	0	0	0		3	1	0	0	0	0	0	0			Exp 4	79	237
	4	5	0	0	0	0	0	0		4	2	0	0	0	0	0	0		4	3	1	1	0	0	0	0		4	5	0	1	0	0	0	0		4	1	1	2	2	0	0	0			Exp 5	57	102
	5	6	2	5	2	0	0	0		5	4	0	0	0	0	0	0		5	3	1	0	0	0	0	0		5	1	1	0	0	0	0	0		5	1	1	1	1	1	1	1			TOTAL	362	1219
	6	2	0	2	0	0	0	0		6	3	0	0	0	0	0	0		6	4	0	0	0	0	0	0		6	1	1	0	0	0	0	0		6	2	1	1	1	1	1	1
	7	2	0	0	0	0	0	0		7	4	2	0	0	0	0	0		7	3	0	1	0	0	0	0		7	1	1	0	0	0	0	0		7	1	0	1	0	0	0	0
	8	2	1	0	0	0	0	0		8	3	3	1	1	0	0	0		8	2	0	0	0	0	0	0		8	5	0	2	0	0	0	0		8	1	1	1	1	1	1	1
	9	2	1	1	1	0	0	0		9	5	2	0	0	0	0	0		9	1	0	0	0	0	0	0		9	6	0	0	0	0	0	0		9	1	1	1	1	0	0	0					Exp 1
	10	1	1	1	1	0	0	0		10	2	0	0	0	0	0	0		10	1	0	0	0	0	0	0		10	8	0	0	0	0	0	0		10	1	0	0	0	0	0	0				% contacts leading to motility pause	14.1553
	11	1	1	1	1	0	0	0		11	2	0	0	0	0	0	0		11	4	0	0	0	0	0	0		11	7	0	0	0	0	0	0		11	1	1	1	1	1	1	1				% contacts leading to KilD cluster formation	24.2009
	12	1	0	1	0	0	0	0		12	3	0	0	0	0	0	0		12	3	0	0	0	0	0	0		12	12	0	0	0	0	0	0		12	1	0	1	0	0	0	0				% contacts leading to cell lysis	2.51142
	13	1	0	2	0	0	0	0		13	6	1	1	1	0	0	0		13	3	0	0	0	0	0	0		13	1	0	0	0	0	0	0		13	1	0	0	0	0	0	0				% KilD clusters associated with motility pause	48.1132
	14	3	1	2	2	1	1	1		14	1	1	1	1	0	0	0		14	3	0	0	0	0	0	0		14	12	0	1	0	0	0	0		14	1	0	0	0	0	0	0				% KilD clusters leading to cell lysis	9.43396
	15	4	2	3	2	1	1	1		15	1	1	0	0	0	0	0		15	4	0	0	0	0	0	0		15	3	0	1	0	0	0	0		15	4	0	0	0	0	0	0				% KilD clusters associated with pause leading to cell lysis	19.6078
	16	4	1	3	2	1	1	1		16	2	0	0	0	0	0	0		16	5	0	1	0	0	0	0		16	9	4	0	0	0	0	0		16	3	1	2	1	0	0	0
	17	3	1	3	2	0	0	0		17	3	1	0	0	0	0	0		17	5	0	1	0	0	0	0		17	6	1	4	0	0	0	0		17	1	3	6	2	0	0	0
	18	9	0	3	0	0	0	0		18	3	0	0	0	0	0	0		18	5	0	2	0	0	0	0		18	3	0	1	0	0	0	0		18	2	1	2	1	0	0	0
	19	10	0	3	0	0	0	0		19	3	0	0	0	0	0	0		19	4	0	4	0	0	0	0		19	4	0	0	0	0	0	0		19	1	0	0	0	0	0	0
	20	10	2	5	2	1	1	1		20	1	0	0	0	0	0	0		20	4	1	2	0	0	0	0		20	4	0	0	0	0	0	0		20	1	0	0	0	1	0	0
	21	6	3	3	3	1	1	1		21	1	0	0	0	0	0	0		21	1	0	0	0	0	0	0		21	1	0	1	0	0	0	0		21	1	1	1	1	0	0	0
	22	4	0	0	0	0	0	0		22	3	0	0	0	0	0	0		22	2	0	0	0	0	0	0		22	2	2	1	1	1	1	1		22	1	1	0	0	0	0	0
	23	4	0	0	0	0	0	0		23	1	1	0	0	0	0	0		23	6	0	1	0	0	0	0		23	1	0	0	0	0	0	0		23	1	1	1	1	1	1	1
	24	2	0	1	0	0	0	0		24	3	0	0	0	0	0	0		24	7	0	0	0	0	0	0		24	7	2	1	0	0	0	0		24	1	0	1	0	0	0	0
	25	2	0	0	0	0	0	0		25	1	0	0	0	0	0	0		25	5	0	0	0	0	0	0		25	9	2	2	2	0	0	0		25	5	1	1	1	0	0	0
	26	12	1	1	1	1	1	1		26	1	0	0	0	0	0	0		26	1	0	0	0	0	0	0		26	2	1	1	1	0	0	0		26	1	1	1	1	0	0	0
	27	7	1	1	1	0	0	0		27	2	0	0	0	0	0	0		27	1	0	0	0	0	0	0		27	1	0	0	0	0	0	0		27	3	0	0	0	0	0	0
	28	12	1	4	1	0	0	0		28	2	0	0	0	0	0	0		28	4	0	2	0	0	0	0		28	6	4	3	3	0	0	0		28	1	1	2	2	1	1	1
	29	11	1	0	0	0	0	0		29	2	0	0	0	0	0	0		29	2	0	0	0	0	0	0		29	3	0	0	0	0	0	0		29	2	0	1	0	0	0	0
	30	1	1	1	1	0	0	0		30	1	1	0	0	0	0	0		30	1	0	1	0	0	0	0		30	5	2	0	0	0	0	0		30	2	1	0	0	0	0	0
	31	1	1	1	1	0	0	0		31	1	1	1	1	0	0	0		31	2	0	0	0	0	0	0		31	2	0	1	0	0	0	0		31	2	1	1	1	0	0	0
	32	2	1	0	0	0	0	0		32	1	0	0	0	0	0	0		32	3	0	0	0	0	0	0		32	3	0	0	0	0	0	0		32	2	1	0	0	0	0	0
	33	1	0	0	0	0	0	0		33	2	1	0	0	0	0	0		33	2	0	1	0	0	0	0		33	2	0	1	0	0	0	0		33	2	0	0	0	0	0	0
	34	1	1	1	1	0	0	0		34	8	0	0	0	0	0	0		34	3	0	0	0	0	0	0		34	4	0	0	0	0	0	0		34	1	1	1	1	0	0	0
	35	1	0	0	0	0	0	0		35	1	0	0	0	0	0	0		35	1	0	0	0	0	0	0		35	2	1	0	0	0	0	0		35	2	0	0	0	0	0	0
	36	4	0	1	0	0	0	0		36	2	2	1	1	0	0	0		36	1	0	2	0	0	0	0		36	2	1	0	0	0	0	0		36	1	0	0	0	0	0	0
	37	10	0	2	0	0	0	0		37	3	0	0	0	0	0	0		37	2	0	1	0	0	0	0		37	1	1	1	1	0	0	0		37	3	1	1	0	0	0	0
	38	5	1	2	1	1	1	1		38	5	0	0	0	0	0	0		38	1	0	1	0	0	0	0		38	2	1	0	0	0	0	0		38	1	1	1	1	0	0	0
	39	5	0	1	0	0	0	0		39	4	1	1	1	0	0	0		39	2	0	0	0	0	0	0		39	2	0	0	0	0	0	0		39	1	1	0	0	0	0	0
	40	3	0	1	0	0	0	0		40	5	1	1	1	0	0	0		40	3	1	0	0	0	0	0		40	2	0	1	0	0	0	0		40	1	1	0	0	0	0	0
	41	7	0	3	0	0	0	0		41	8	0	1	0	0	0	0		41	1	1	0	0	0	0	0		41	5	0	1	0	0	0	0		41	1	1	0	0	0	0	0
	42	9	2	4	2	0	0	0		42	1	0	0	0	0	0	0		42	1	1	0	0	0	0	0		42	2	0	0	0	0	0	0		42	2	0	1	0	0	0	0
	43	1	1	1	1	0	0	0		43	1	0	0	0	0	0	0		43	3	0	0	0	0	0	0		43	1	1	1	1	0	0	0		43	4	0	0	0	0	0	0
	44	3	1	2	1	0	0	0		44	3	0	0	0	0	0	0		44	3	0	0	0	0	0	0		44	2	2	2	2	0	0	0		44	3	1	1	0	0	0	0
	45	2	0	1	0	0	0	0		45	2	1	0	0	0	0	0		45	2	0	0	0	0	0	0		45	2	0	0	0	0	0	0		45	2	1	1	1	0	0	0
	46	1	0	0	0	0	0	0		46	3	0	0	0	0	0	0		46	3	0	0	0	0	0	0		46	2	0	0	0	0	0	0		46	2	1	1	1	0	0	0
	47	2	0	0	0	0	0	0		47	1	1	1	1	0	0	0		47	1	0	0	0	0	0	0		47	2	1	0	0	0	0	0		47	2	1	1	1	1	1	1
	48	8	0	2	0	0	0	0		48	1	0	1	0	0	0	0		48	2	0	0	0	0	0	0		48	2	0	0	0	0	0	0		48	4	0	0	0	0	0	0
	49	1	0	0	0	0	0	0		49	3	0	0	0	0	0	0		49	1	1	0	0	0	0	0		49	3	0	0	0	0	0	0		49	1	1	1	1	0	0	0
	50	1	0	1	0	0	0	0		50	1	1	1	1	0	0	0		50	4	0	1	0	0	0	0		50	1	0	0	0	0	0	0		50	1	0	0	0	0	0	0
	51	1	0	0	0	0	0	0		51	3	0	0	0	0	0	0		51	1	0	2	0	0	0	0		51	1	1	0	0	0	0	0		51	3	0	1	0	0	0	0
	52	14	1	2	1	0	0	0		52	2	0	0	0	1	0	0		52	9	0	2	0	1	1	0		52	1	1	0	0	0	0	0		52	1	0	0	0	0	0	0
	53	8	2	4	2	0	0	0		53	2	0	0	0	0	0	0		53	9	0	3	0	0	0	0		53	1	1	1	1	0	0	0		53	4	0	1	0	0	0	0
	54	5	0	1	0	0	0	0		54	1	1	0	0	0	0	0		54	9	1	1	1	0	0	0		54	3	1	1	1	0	0	0		54	2	0	2	0	0	0	0
	55	1	0	1	0	0	0	0		55	2	1	0	0	0	0	0		55	4	1	2	1	0	0	0		55	4	0	2	0	0	0	0		55	2	0	1	0	0	0	0
	56	12	4	4	4	0	0	0		56	2	0	1	0	0	0	0		56	1	0	0	0	0	0	0		56	2	0	1	0	0	0	0		56	2	0	0	0	0	0	0
	57	8	0	0	0	0	0	0	TOTAL	56	141	25	13	10	1	0	0		57	5	0	1	0	0	0	0		57	2	0	0	0	0	0	0		57	2	0	0	0	0	0	0
	58	3	0	0	0	0	0	0											58	8	1	2	0	0	0	0		58	1	1	1	1	1	1	1	TOTAL	57	102	33	48	24	8	7	7
	59	4	1	1	1	0	0	0											59	16	1	2	1	0	0	0		59	1	1	1	1	0	0	0
	60	1	0	1	0	0	0	0											60	3	0	1	0	0	0	0		60	2	0	0	0	0	0	0
	61	8	1	1	1	0	0	0											61	3	0	0	0	0	0	0		61	4	0	0	0	0	0	0
	62	8	1	1	1	1	1	1											62	12	0	0	0	0	0	0		62	3	0	0	0	0	0	0
	63	2	1	1	1	1	1	1											63	8	0	1	0	0	0	0		63	3	0	0	0	0	0	0
	64	13	0	0	0	0	0	0											64	7	0	1	0	0	0	0		64	3	0	0	0	0	0	0
	65	5	0	0	0	0	0	0											65	4	0	1	0	0	0	0		65	2	0	0	0	0	0	0
	66	9	2	2	2	0	0	0											66	2	0	0	0	0	0	0		66	2	0	0	0	0	0	0
	67	7	1	0	0	0	0	0											67	2	0	1	0	0	0	0		67	3	0	2	0	0	0	0
	68	11	2	3	2	0	0	0											68	5	0	0	0	0	0	0		68	1	0	2	0	0	0	0
	69	12	1	0	0	1	0	0											69	6	0	1	0	0	0	0		69	1	0	1	0	0	0	0
	70	13	3	1	1	0	0	0											70	2	0	0	0	0	0	0		70	2	0	0	0	0	0	0
	71	1	0	0	0	0	0	0											71	5	0	0	0	0	0	0		71	1	0	1	0	0	0	0
	72	3	0	0	0	0	0	0											72	4	0	0	0	0	0	0		72	1	0	0	0	0	0	0
	73	7	0	0	0	0	0	0											73	3	0	0	0	0	0	0		73	3	2	4	2	0	0	0
	74	5	0	2	0	0	0	0											74	3	0	0	0	0	0	0		74	1	1	2	2	0	0	0
	75	5	0	0	0	0	0	0											75	2	0	1	0	0	0	0		75	1	0	1	0	0	0	0
	76	4	0	0	0	0	0	0											76	3	0	1	0	0	0	0		76	1	1	1	1	0	0	0
	77	4	0	0	0	0	0	0											77	4	0	1	0	0	0	0		77	1	0	0	0	0	0	0
	78	3	0	0	0	0	0	0											78	4	0	0	0	0	0	0		78	1	0	0	0	0	0	0
	79	2	1	0	0	0	0	0											79	5	0	2	0	0	0	0		79	1	1	1	1	0	0	0
	80	1	0	0	0	0	0	0											80	3	0	1	0	0	0	0	TOTAL	79	237	42	51	22	2	2	2
	81	7	1	1	1	1	1	1											81	4	1	2	1	0	0	0
	82	5	2	1	1	0	0	0											82	3	0	1	1	0	0	0
	83	5	2	1	1	0	0	0										TOTAL	82	301	13	52	5	1	1	0
	84	1	1	1	1	0	0	0
	85	1	1	0	0	0	0	0
	86	1	1	0	0	0	0	0
	87	15	2	2	0	0	0	0
	88	9	0	0	0	0	0	0
TOTAL	88	438	62	106	51	11	10	10
[truncated: 6 more columns]

## Sheet: Predation with ∆kilG (∆4651)
	Predation with ∆kilG (mxan_4651) M. xanthus (experiment 1)									Predation with ∆kilG (mxan_4651) M. xanthus (experiment 2)									Predation with ∆kilG (mxan_4651) M. xanthus (experiment 3)									Predation with ∆kilG (mxan_4651) M. xanthus (experiment 4)									Predation with ∆kilG (mxan_4651) M. xanthus (experiment 5)											E. coli cell #	Contacts with Myxo
	E. coli cell #	Contacts with Myxo	Total Pauses	KilD-nG clusters	KilD-nG cluster + pause	Lysis ?	Lysis + KilD-nG cluster	Lysis + KilD-nG cluster and pause		E. coli cell #	Contacts with Myxo	Total Pauses	KilD-nG clusters	KilD-nG cluster + pause	Lysis ?	Lysis + KilD-nG cluster	Lysis + KilD-nG cluster and pause		E. coli cell #	Contacts with Myxo	Total Pauses	KilD-nG clusters	KilD-nG cluster + pause	Lysis ?	Lysis + KilD-nG cluster	Lysis + KilD-nG cluster and pause		E. coli cell #	Contacts with Myxo	Total Pauses	KilD-nG clusters	KilD-nG cluster + pause	Lysis ?	Lysis + KilD-nG cluster	Lysis + KilD-nG cluster and pause		E. coli cell #	Contacts with Myxo	Total Pauses	KilD-nG clusters	KilD-nG cluster + pause	Lysis ?	Lysis + KilD-nG cluster	Lysis + KilD-nG cluster and pause			Exp 1	61	198
	1	4	0	4	0	0	0	0		1	1	1	1	1	0	0	0		1	3	0	0	0	0	0	0		1	6	0	0	0	0	0	0		1	2	0	0	0	0	0	0			Exp 2	80	345
	2	1	0	0	0	0	0	0		2	2	0	1	0	0	0	0		2	2	0	0	0	0	0	0		2	6	0	0	0	0	0	0		2	1	0	0	0	0	0	0			Exp 3	48	91
	3	4	0	0	0	0	0	0		3	1	0	1	0	0	0	0		3	1	0	1	0	0	0	0		3	1	0	0	0	0	0	0		3	2	0	1	0	0	0	0			Exp 4	90	274
	4	1	0	1	0	0	0	0		4	1	0	0	0	0	0	0		4	1	0	1	0	0	0	0		4	1	0	0	0	0	0	0		4	5	0	3	0	0	0	0			Exp 5	107	233
	5	1	0	0	0	0	0	0		5	3	0	0	0	0	0	0		5	5	1	1	0	1	1	0		5	4	0	2	0	0	0	0		5	4	0	4	0	0	0	0			TOTAL	386	1141
	6	1	0	0	0	0	0	0		6	2	1	1	1	0	0	0		6	6	1	1	0	1	1	0		6	4	0	1	0	0	0	0		6	2	0	2	0	0	0	0
	7	2	0	0	0	0	0	0		7	3	0	0	0	0	0	0		7	3	0	1	0	0	0	0		7	1	0	1	0	0	0	0		7	1	0	0	0	0	0	0
	8	3	0	1	0	0	0	0		8	2	0	0	0	0	0	0		8	3	0	0	0	0	0	0		8	1	0	1	0	0	0	0		8	1	0	1	0	0	0	0
	9	1	0	0	0	0	0	0		9	2	0	0	0	0	0	0		9	2	0	0	0	0	0	0		9	1	0	0	0	0	0	0		9	1	0	1	0	0	0	0					Exp 1
	10	3	0	0	0	0	0	0		10	4	0	0	0	0	0	0		10	5	0	3	0	0	0	0		10	2	0	0	0	0	0	0		10	2	1	2	2	1	1	1				% contacts leading to motility pause	5.05051
	11	2	0	1	0	0	0	0		11	4	0	0	0	0	0	0		11	1	0	0	0	0	0	0		11	1	0	0	0	0	0	0		11	1	1	1	1	0	0	0				% contacts leading to KilD cluster formation	24.2424
	12	2	0	0	0	0	0	0		12	4	0	0	0	0	0	0		12	3	0	3	0	0	0	0		12	14	0	0	0	0	0	0		12	1	0	1	0	0	0	0				% contacts leading to cell lysis	0.505051
	13	2	1	1	0	0	0	0		13	7	0	1	0	0	0	0		13	3	0	0	0	0	0	0		13	1	1	1	0	0	0	0		13	1	1	1	1	0	0	0				% KilD clusters associated with motility pause	10.4167
	14	6	1	1	0	0	0	0		14	4	1	3	1	0	0	0		14	1	0	0	0	0	0	0		14	1	1	2	1	0	0	0		14	1	1	1	1	1	1	1				% KilD clusters leading to cell lysis	2.08333
	15	8	0	1	0	0	0	0		15	1	1	1	1	1	1	1		15	2	0	0	0	0	0	0		15	1	1	1	1	0	0	0		15	1	0	0	0	0	0	0				% KilD clusters associated with pause leading to cell lysis	20
	16	11	0	1	0	0	0	0		16	6	1	2	1	1	1	1		16	2	0	0	0	0	0	0		16	7	1	0	0	0	0	0		16	2	0	0	0	0	0	0
	17	2	0	2	0	0	0	0		17	4	2	1	1	0	0	0		17	4	0	0	0	0	0	0		17	5	0	0	0	0	0	0		17	3	0	1	0	0	0	0
	18	1	0	1	0	0	0	0		18	6	1	1	1	1	1	1		18	2	0	0	0	0	0	0		18	4	0	1	0	0	0	0		18	1	0	1	0	0	0	0
	19	3	0	0	0	0	0	0		19	6	0	0	0	0	0	0		19	5	0	3	0	0	0	0		19	4	0	0	0	0	0	0		19	3	0	1	0	0	0	0
	20	3	0	0	0	0	0	0		20	5	2	1	1	0	0	0		20	2	0	1	0	0	0	0		20	2	0	1	0	0	0	0		20	3	0	0	0	0	0	0
	21	2	0	0	0	0	0	0		21	2	1	1	1	0	0	0		21	1	0	1	0	0	0	0		21	4	0	1	0	0	0	0		21	2	0	0	0	0	0	0
	22	2	0	0	0	0	0	0		22	3	0	0	0	0	0	0		22	0	0	0	0	0	0	0		22	5	0	1	0	0	0	0		22	1	0	0	0	0	0	0
	23	2	0	0	0	0	0	0		23	2	2	3	1	0	0	0		23	3	2	0	0	0	0	0		23	2	0	1	0	0	0	0		23	2	0	0	0	0	0	0
	24	3	0	1	0	0	0	0		24	4	1	1	0	0	0	0		24	4	1	1	0	0	0	0		24	3	0	0	0	0	0	0		24	2	0	0	0	0	0	0
	25	2	0	1	0	0	0	0		25	1	1	1	1	0	0	0		25	1	0	0	0	1	0	0		25	3	0	1	0	0	0	0		25	1	0	1	0	0	0	0
	26	2	0	0	0	0	0	0		26	4	0	0	0	0	0	0		26	1	1	1	1	1	1	1		26	6	0	2	0	0	0	0		26	1	0	0	0	0	0	0
	27	1	0	2	0	0	0	0		27	2	0	0	0	0	0	0		27	2	0	1	0	0	0	0		27	7	0	3	0	0	0	0		27	2	1	2	1	1	1	1
	28	4	0	3	0	0	0	0		28	1	0	0	0	0	0	0		28	1	0	0	0	0	0	0		28	6	0	1	0	0	0	0		28	1	1	1	1	1	1	1
	29	2	0	2	0	0	0	0		29	1	0	0	0	0	0	0		29	1	0	1	0	0	0	0		29	5	0	0	0	0	0	0		29	3	1	3	1	1	1	1
	30	2	0	0	0	0	0	0		30	2	0	0	0	0	0	0		30	1	0	0	0	0	0	0		30	2	1	1	0	0	0	0		30	3	1	1	1	0	0	0
	31	2	0	1	0	0	0	0		31	4	1	1	1	0	0	0		31	1	0	0	0	0	0	0		31	3	0	1	0	0	0	0		31	2	1	1	1	0	0	0
	32	2	0	0	0	0	0	0		32	6	0	1	0	0	0	0		32	1	0	0	0	0	0	0		32	4	0	0	0	0	0	0		32	1	1	1	1	1	1	1
	33	1	0	0	0	0	0	0		33	6	0	0	0	0	0	0		33	1	0	0	0	0	0	0		33	2	0	0	0	0	0	0		33	1	0	0	0	0	0	0
	34	5	0	0	0	0	0	0		34	3	0	0	0	0	0	0		34	1	0	0	0	0	0	0		34	1	0	0	0	0	0	0		34	1	0	0	0	0	0	0
	35	8	0	0	0	0	0	0		35	2	0	0	0	0	0	0		35	1	0	0	0	0	0	0		35	1	0	0	0	0	0	0		35	2	0	1	0	0	0	0
	36	5	0	4	0	0	0	0		36		0	0	0	0	0	0		36	1	0	0	0	0	0	0		36	1	0	1	0	0	0	0		36	1	0	0	0	0	0	0
	37	5	0	0	0	0	0	0		37	1	1	1	1	1	1	1		37	2	0	0	0	0	0	0		37	7	0	0	0	0	0	0		37	1	0	0	0	0	0	0
	38	6	0	1	0	0	0	0		38	1	1	1	1	1	1	1		38	1	0	0	0	0	0	0		38	1	0	0	0	0	0	0		38	4	1	2	0	0	0	0
	39	9	0	0	0	0	0	0		39	1	1	1	1	1	1	1		39	1	0	0	0	0	0	0		39	1	0	0	0	0	0	0		39	4	1	1	1	0	0	0
	40	9	0	4	1	0	0	0		40	4	0	1	0	0	0	0		40	1	0	0	0	0	0	0		40	2	0	0	0	0	0	0		40	1	0	1	0	0	0	0
	41	2	1	2	1	0	0	0		41	7	0	0	0	0	0	0		41	2	0	0	0	0	0	0		41	7	1	2	0	0	0	0		41	2	1	1	1	1	1	1
	42	1	1	2	1	1	1	1		42	7	0	0	0	0	0	0		42	1	0	0	0	0	0	0		42	2	1	0	0	0	0	0		42	4	1	2	1	0	0	0
	43	1	1	0	0	0	0	0		43	1	1	0	0	0	0	0		43	1	0	0	0	0	0	0		43	1	0	0	0	0	0	0		43	4	1	3	1	0	0	0
	44	6	2	1	1	0	0	0		44	8	0	1	0	0	0	0		44	1	0	0	0	0	0	0		44	1	0	0	0	0	0	0		44	4	1	1	1	0	0	0
	45	4	1	1	1	0	0	0		45	2	0	0	0	0	0	0		45	1	0	0	0	0	0	0		45	2	0	0	0	0	0	0		45	3	0	0	0	0	0	0
	46	3	0	0	0	0	0	0		46	3	1	1	1	0	0	0		46	1	0	0	0	0	0	0		46	1	0	0	0	0	0	0		46	5	0	1	0	0	0	0
	47	4	0	1	0	0	0	0		47	2	0	0	0	1	0	0		47	1	1	1	1	1	1	1		47	1	0	0	0	0	0	0		47	4	1	4	1	0	0	0
	48	3	0	0	0	0	0	0		48	10	0	0	0	0	0	0		48	1	0	1	0	0	0	0		48	3	0	1	0	0	0	0		48	6	1	3	1	0	0	0
	49	4	0	2	0	0	0	0		49	5	0	1	0	0	0	0	TOTAL	48	91	7	22	2	5	4	2		49	4	0	1	0	0	0	0		49	1	1	1	1	1	1	1
	50	5	1	1	0	0	0	0		50	3	0	0	0	0	0	0											50	4	0	0	0	0	0	0		50	2	0	1	0	0	0	0
	51	4	0	1	0	0	0	0		51	6	0	0	0	0	0	0											51	5	0	0	0	0	0	0		51	1	1	1	1	0	0	0
	52	5	0	2	0	0	0	0		52	1	0	0	0	0	0	0											52	7	0	0	0	0	0	0		52	1	1	1	1	1	1	1
	53	1	0	1	0	0	0	0		53	2	0	0	0	0	0	0											53	3	0	1	0	0	0	0		53	2	0	0	0	0	0	0
	54	6	0	0	0	0	0	0		54	1	1	0	0	0	0	0											54	3	0	1	0	0	0	0		54	4	0	0	0	0	0	0
	55	2	1	1	0	0	0	0		55	1	0	1	1	0	0	0											55	3	0	2	0	0	0	0		55	1	1	0	0	0	0	0
	56	1	0	0	0	0	0	0		56	1	0	0	0	0	0	0											56	4	0	0	0	0	0	0		56	1	0	0	0	0	0	0
	57	2	0	0	0	0	0	0		57	2	0	0	0	0	0	0											57	6	0	1	0	0	0	0		57	5	0	0	0	0	0	0
	58	1	0	0	0	0	0	0		58	2	0	0	0	0	0	0											58	2	0	0	0	0	0	0		58	3	1	1	1	1	1	1
	59	5	0	0	0	0	0	0		59	4	0	0	0	0	0	0											59	10	0	3	0	0	0	0		59	1	1	1	1	1	1	1
	60	1	0	0	0	0	0	0		60	6	1	0	0	0	0	0											60	1	0	1	0	0	0	0		60	8	2	2	1	0	0	0
	61	2	0	0	0	0	0	0		61	4	0	0	0	0	0	0											61	3	0	1	0	0	0	0		61	2	0	0	0	0	0	0
TOTAL	61	198	10	48	5	1	1	1		62	4	0	0	0	0	0	0											62	2	1	0	0	0	0	0		62	6	0	0	0	0	0	0
										63	3	0	0	0	0	0	0											63	1	0	0	0	0	0	0		63	2	0	0	0	0	0	0
										64	3	0	0	0	0	0	0											64	1	0	0	0	0	0	0		64	1	0	0	0	0	0	0
										65	3	0	0	0	0	0	0											65	1	0	0	0	0	0	0		65	3	1	2	1	0	0	0
										66	2	0	0	0	0	0	0											66	8	0	0	0	0	0	0		66	3	1	3	2	0	0	0
										67	9	0	1	0	0	0	0											67	2	0	0	0	0	0	0		67	2	1	1	1	0	0	0
										68	10	0	0	0	0	0	0											68	2	0	0	0	0	0	0		68	1	1	1	1	0	0	0
										69	9	0	0	0	0	0	0											69	1	0	0	0	0	0	0		69	1	0	0	0	0	0	0
										70	18	0	1	0	0	0	0											70	1	0	0	0	0	0	0		70	1	1	1	1	1	1	1
										71	5	0	0	0	0	0	0											71	5	0	0	0	0	0	0		71	2	1	2	1	0	0	0
										72	4	0	0	0	0	0	0											72	3	0	1	0	0	0	0		72	2	0	3	0	0	0	0
										73	5	0	0	0	0	0	0											73	1	0	0	0	0	0	0		73	1	0	0	0	0	0	0
										74	8	1	1	0	0	0	0											74	1	0	0	0	0	0	0		74	2	0	0	0	0	0	0
										75	15	0	2	0	0	0	0											75	5	0	1	0	0	0	0		75	2	0	2	0	0	0	0
										76	13	0	3	0	0	0	0											76	4	0	0	0	0	0	0		76	6	0	2	0	0	0	0
										77	11	0	0	0	0	0	0											77	3	0	0	0	0	0	0		77	5	2	2	2	1	1	1
										78	4	0	0	0	0	0	0											78	1	0	0	0	0	0	0		78	3	2	2	2	0	0	0
										79	12	0	2	0	0	0	0											79	1	0	0	0	0	0	0		79	1	0	1	0	0	0	0
										80	11	0	0	0	0	0	0											80	1	0	1	0	0	0	0		80	1	0	2	0	0	0	0
									TOTAL	80	345	24	40	17	7	6	6											81	2	0	0	0	0	0	0		81	3	1	1	1	0	0	0
																												82	1	0	0	0	0	0	0		82	1	0	0	0	0	0	0
																												83	2	0	0	0	0	0	0		83	3	1	2	2	1	1	1
																												84	3	0	0	0	0	0	0		84	2	0	0	0	0	0	0
																												85	3	0	0	0	0	0	0		85	2	0	1	0	0	0	0
																												86	2	0	1	0	0	0	0		86	1	0	0	0	0	0	0
																												87	2	0	0	0	0	0	0		87	1	0	1	0	0	0	0
																												88	3	0	2	0	0	0	0		88	1	0	0	0	0	0	0
																												89	3	0	0	0	0	0	0		89	1	0	0	0	0	0	0
																												90	3	0	0	0	0	0	0		90	1	0	0	0	0	0	0
																											TOTAL	90	274	8	44	2	0	0	0		91	3	0	0	0	0	0	0
																																					92	3	0	0	0	0	0	0
																																					93	1	0	0	0	0	0	0
																																					94	2	0	1	0	0	0	0
																																					95	1	0	0	0	0	0	0
																																					96	1	0	0	0	0	0	0
																																					97	1	1	1	1	1	1	1
																																					98	1	0	0	0	0	0	0
																																					99	2	0	0	0	0	0	0
																																					100	2	0	1	0	0	0	0
																																					101	1	0	1	0	0	0	0
																																					102	3	1	1	1	0	0	0
																																					103	3	1	0	0	0	0	0
																																					104	3	1	1	1	0	0	0
																																					105	1	0	1	0	0	0	0
																																					106	3	0	1	0	0	0	0
																																					107	3	1	1	1	1	1	1
																																				TOTAL	107	233	43	97	42	16	16	16
[truncated: 6 more columns]

## Sheet: Predation with ∆kilB (∆4652)
	Predation with ∆kilB (mxan_4652) M. xanthus (experiment 1)									Predation with ∆kilB (mxan_4652) M. xanthus (experiment 2)									Predation with ∆kilB (mxan_4652) M. xanthus (experiment 3)									Predation with ∆kilB (mxan_4652) M. xanthus (experiment 4)									Predation with ∆kilB (mxan_4652) M. xanthus (experiment 5)											E. coli cell #	Contacts with Myxo
	E. coli cell #	Contacts with Myxo	Total Pauses	KilD-nG clusters	KilD-nG cluster + pause	Lysis ?	Lysis + KilD-nG cluster	Lysis + KilD-nG cluster and pause		E. coli cell #	Contacts with Myxo	Total Pauses	KilD-nG clusters	KilD-nG cluster + pause	Lysis ?	Lysis + KilD-nG cluster	Lysis + KilD-nG cluster and pause		E. coli cell #	Contacts with Myxo	Total Pauses	KilD-nG clusters	KilD-nG cluster + pause	Lysis ?	Lysis + KilD-nG cluster	Lysis + KilD-nG cluster and pause		E. coli cell #	Contacts with Myxo	Total Pauses	KilD-nG clusters	KilD-nG cluster + pause	Lysis ?	Lysis + KilD-nG cluster	Lysis + KilD-nG cluster and pause		E. coli cell #	Contacts with Myxo	Total Pauses	KilD-nG clusters	KilD-nG cluster + pause	Lysis ?	Lysis + KilD-nG cluster	Lysis + KilD-nG cluster and pause			Exp 1	80	261
	1	3	1	0	0	0	0	0		1	2	1	0	0	0	0	0		1	4	0	1	0	0	0	0		1	1	1	0	0	0	0	0		1	4	0	0	0	0	0	0			Exp 2	91	160
	2	4	1	1	0	0	0	0		2	1	1	1	1	0	0	0		2	2	0	2	0	0	0	0		2	2	1	0	0	0	0	0		2	4	0	3	0	0	0	0			Exp 3	64	94
	3	6	0	3	0	0	0	0		3	1	0	0	0	0	0	0		3	1	0	0	0	0	0	0		3	1	0	0	0	0	0	0		3	3	0	0	0	0	0	0			Exp 4	65	188
	4	3	1	2	0	0	0	0		4	1	0	0	0	0	0	0		4	1	0	0	0	0	0	0		4	3	1	1	0	1	1	0		4	2	2	2	2	0	0	0			Exp 5	53	139
	5	5	1	3	1	0	0	0		5	1	1	1	1	0	0	0		5	1	0	0	0	0	0	0		5	1	0	0	0	0	0	0		5	2	1	1	1	0	0	0			TOTAL	353	842
	6	2	1	0	0	0	0	0		6	1	0	0	0	0	0	0		6	1	1	1	1	1	1	1		6	1	0	0	0	0	0	0		6	4	1	0	0	0	0	0
	7	3	1	0	0	0	0	0		7	3	1	1	1	0	0	0		7	1	1	1	1	0	0	0		7	1	0	1	0	0	0	0		7	4	0	0	0	0	0	0
	8	1	0	2	0	0	0	0		8	1	0	0	0	0	0	0		8	1	1	1	1	0	0	0		8	4	0	1	0	0	0	0		8	3	0	1	0	0	0	0
	9	2	1	0	0	0	0	0		9	1	0	0	0	0	0	0		9	1	1	2	2	0	0	0		9	5	0	0	0	0	0	0		9	3	0	1	0	0	0	0					Exp 1
	10	1	0	0	0	0	0	0		10	1	1	2	1	0	0	0		10	1	1	0	0	0	0	0		10	4	0	0	0	0	0	0		10	1	1	0	0	0	0	0				% contacts leading to motility pause	20.6897
	11	2	1	2	1	0	0	0		11	4	1	1	1	0	0	0		11	1	1	1	1	0	0	0		11	1	0	2	0	0	0	0		11	8	1	1	1	0	0	0				% contacts leading to KilD cluster formation	24.9042
	12	12	1	1	1	0	0	0		12	1	0	0	0	0	0	0		12	1	0	0	0	0	0	0		12	1	1	1	1	1	1	1		12	1	1	1	1	0	0	0				% contacts leading to cell lysis	1.53257
	13	3	1	0	0	1	0	0		13	2	0	0	0	0	0	0		13	1	1	1	1	0	0	0		13	1	1	1	1	0	0	0		13	5	1	2	0	0	0	0				% KilD clusters associated with motility pause	46.1538
	14	2	1	1	1	1	1	1		14	1	0	0	0	0	0	0		14	1	0	0	0	0	0	0		14	1	1	1	1	0	0	0		14	8	1	0	0	0	0	0				% KilD clusters leading to cell lysis	4.61538
	15	4	1	0	0	0	0	0		15	1	1	1	1	0	0	0		15	2	0	0	0	0	0	0		15	1	0	0	0	0	0	0		15	1	1	1	1	0	0	0				% KilD clusters associated with pause leading to cell lysis	10
	16	2	1	1	1	0	0	0		16	2	0	0	0	0	0	0		16	1	1	1	1	0	0	0		16	1	0	0	0	0	0	0		16	3	1	1	1	0	0	0
	17	4	0	1	0	0	0	0		17	3	0	0	0	0	0	0		17	1	1	1	1	0	0	0		17	2	1	2	1	1	1	1		17	1	0	0	0	0	0	0
	18	2	0	0	0	0	0	0		18	2	1	2	1	0	0	0		18	2	0	0	0	0	0	0		18	1	1	1	1	0	0	0		18	3	0	3	0	0	0	0
	19	1	0	0	0	0	0	0		19	1	0	0	0	0	0	0		19	4	2	3	1	0	0	0		19	2	1	1	1	0	0	0		19	4	0	0	0	0	0	0
	20	1	0	0	0	0	0	0		20	2	1	1	1	0	0	0		20	1	1	2	2	1	1	1		20	3	2	2	1	0	0	0		20	2	0	1	0	0	0	0
	21	1	1	1	1	1	1	1		21	1	1	1	1	0	0	0		21	1	0	0	0	0	0	0		21	2	0	0	0	0	0	0		21	5	0	0	0	0	0	0
	22	3	0	1	0	0	0	0		22	1	0	0	0	0	0	0		22	1	0	0	0	0	0	0		22	3	1	4	1	0	0	0		22	3	0	1	0	0	0	0
	23	2	1	1	1	0	0	0		23	2	0	0	0	0	0	0		23	1	1	0	0	0	0	0		23	3	1	2	1	1	1	1		23	2	1	1	1	0	0	0
	24	1	1	1	1	0	0	0		24	2	0	0	0	0	0	0		24	1	1	1	1	0	0	0		24	1	0	0	0	0	0	0		24	5	0	1	0	0	0	0
	25	2	1	2	1	0	0	0		25	3	0	0	0	0	0	0		25	4	0	0	0	0	0	0		25	1	0	0	0	0	0	0		25	1	0	0	0	0	0	0
	26	1	0	0	0	0	0	0		26	4	2	1	1	0	0	0		26	3	0	0	0	0	0	0		26	2	0	0	0	0	0	0		26	1	0	0	0	0	0	0
	27	1	1	1	1	0	0	0		27	2	2	1	1	0	0	0		27	3	0	0	0	0	0	0		27	2	0	0	0	0	0	0		27	1	1	1	1	0	0	0
	28	1	1	1	1	0	0	0		28	1	1	1	1	0	0	0		28	3	0	0	0	0	0	0		28	2	0	0	0	0	0	0		28	2	0	1	0	0	0	0
	29	1	1	1	1	0	0	0		29	3	0	1	0	0	0	0		29	1	1	1	1	0	0	0		29	1	0	1	0	0	0	0		29	2	0	0	0	0	0	0
	30	8	3	5	1	0	0	0		30	1	0	0	0	0	0	0		30	2	0	0	0	0	0	0		30	3	0	0	0	0	0	0		30	1	0	1	0	0	0	0
	31	6	0	1	1	0	0	0		31	3	1	1	1	0	0	0		31	3	0	0	0	0	0	0		31	3	0	0	0	0	0	0		31	1	1	1	0	0	0	0
	32	2	1	2	1	0	0	0		32	5	0	0	0	0	0	0		32	2	1	0	0	0	0	0		32	10	0	0	0	0	0	0		32	1	0	0	0	0	0	0
	33	2	1	0	0	0	0	0		33	5	0	0	0	0	0	0		33	1	0	0	0	0	0	0		33	1	0	0	0	0	0	0		33	3	1	1	0	0	0	0
	34	1	1	0	0	0	0	0		34	2	0	0	0	0	0	0		34	3	2	1	1	0	0	0		34	3	0	1	0	0	0	0		34	2	1	1	0	0	0	0
	35	1	1	0	0	0	0	0		35	1	0	0	0	0	0	0		35	4	0	2	0	0	0	0		35	1	1	1	1	1	1	1		35	2	2	0	0	0	0	0
	36	2	0	0	0	0	0	0		36	1	0	0	0	0	0	0		36	1	0	0	0	0	0	0		36	4	0	1	0	0	0	0		36	5	1	0	0	0	0	0
	37	7	2	3	1	0	0	0		37	2	1	0	0	0	0	0		37	1	0	0	0	0	0	0		37	3	1	2	0	0	0	0		37	7	1	0	0	0	0	0
	38	4	0	1	1	0	0	0		38	1	1	2	1	0	0	0		38	1	0	0	0	0	0	0		38	1	1	0	0	0	0	0		38	3	0	0	0	0	0	0
	39	3	2	0	0	0	0	0		39	1	1	0	0	0	0	0		39	1	0	0	0	0	0	0		39	6	0	2	0	0	0	0		39	2	0	0	0	0	0	0
	40	2	1	0	0	0	0	0		40	2	1	0	0	0	0	0		40	1	0	0	0	0	0	0		40	2	1	1	1	1	1	1		40	1	0	0	0	0	0	0
	41	5	0	1	0	0	0	0		41	2	0	0	0	0	0	0		41	1	1	1	1	0	0	0		41	3	0	1	0	0	0	0		41	1	0	1	0	0	0	0
	42	1	1	1	1	0	0	0		42	2	0	0	0	0	0	0		42	1	0	0	0	0	0	0		42	3	0	1	0	0	0	0		42	2	0	0	0	0	0	0
	43	2	2	1	1	0	0	0		43	2	0	0	0	0	0	0		43	1	0	0	0	0	0	0		43	3	1	2	2	1	1	1		43	2	0	0	0	0	0	0
	44	2	0	0	0	0	0	0		44	3	0	0	0	0	0	0		44	2	0	1	0	0	0	0		44	2	1	1	0	0	0	0		44	2	0	0	0	0	0	0
	45	1	0	0	0	0	0	0		45	2	0	0	0	0	0	0		45	1	0	0	0	0	0	0		45	3	0	2	0	0	0	0		45	2	1	0	0	0	0	0
	46	2	1	1	0	0	0	0		46	3	1	0	0	0	0	0		46	2	0	1	0	0	0	0		46	1	0	0	0	0	0	0		46	1	0	0	0	0	0	0
	47	1	1	0	0	0	0	0		47	1	0	1	0	0	0	0		47	2	0	0	0	0	0	0		47	2	0	0	0	0	0	0		47	1	1	0	0	0	0	0
	48	1	1	1	1	0	0	0		48	1	0	0	0	0	0	0		48	1	0	0	0	0	0	0		48	5	1	2	2	0	0	0		48	1	1	0	0	0	0	0
	49	1	1	2	1	0	0	0		49	1	0	0	0	0	0	0		49	1	0	0	0	0	0	0		49	8	0	1	0	0	0	0		49	1	2	1	1	0	0	0
	50	1	0	0	0	0	0	0		50	1	0	1	0	0	0	0		50	1	0	0	0	0	0	0		50	1	1	0	0	0	0	0		50	2	1	2	0	0	0	0
	51	1	0	0	0	0	0	0		51	1	1	1	1	0	0	0		51	1	1	1	1	0	0	0		51	6	1	1	1	0	0	0		51	1	0	0	0	0	0	0
	52	1	0	1	0	0	0	0		52	1	0	0	0	0	0	0		52	1	1	1	1	0	0	0		52	3	2	1	1	0	0	0		52	4	1	2	1	0	0	0
	53	3	0	0	0	0	0	0		53	2	2	0	0	0	0	0		53	1	1	0	0	0	0	0		53	10	1	1	1	0	0	0		53	3	0	1	0	0	0	0
	54	8	0	0	0	0	0	0		54	2	0	0	0	0	0	0		54	1	0	0	0	0	0	0		54	7	1	1	1	0	0	0	TOTAL	53	139	27	34	11	0	0	0
	55	1	0	0	0	0	0	0		55	3	0	0	0	0	0	0		55	1	0	0	0	0	0	0		55	2	0	0	0	0	0	0
	56	11	0	0	0	0	0	0		56	3	0	2	0	0	0	0		56	1	1	0	0	0	0	0		56	5	1	0	0	0	0	0
	57	21	0	0	0	0	0	0		57	1	0	1	0	0	0	0		57	1	1	0	0	0	0	0		57	3	1	0	0	0	0	0
	58	2	1	1	1	0	0	0		58	2	0	0	0	0	0	0		58	1	1	1	1	0	0	0		58	5	1	1	1	0	0	0
	59	6	1	0	0	0	0	0		59	3	0	0	0	0	0	0		59	1	0	0	0	0	0	0		59	1	1	1	1	0	0	0
	60	4	0	0	0	0	0	0		60	1	0	0	0	0	0	0		60	1	0	0	0	0	0	0		60	3	1	1	1	1	1	1
	61	1	1	1	1	0	0	0		61	1	1	1	1	0	0	0		61	1	0	0	0	0	0	0		61	6	1	4	1	0	0	0
	62	1	1	1	1	1	1	1		62	3	0	1	0	0	0	0		62	1	0	0	0	0	0	0		62	6	1	1	0	0	0	0
	63	4	1	1	1	0	0	0		63	1	0	0	0	0	0	0		63	1	0	0	0	0	0	0		63	6	0	0	0	0	0	0
	64	3	0	1	0	0	0	0		64	2	0	0	0	0	0	0		64	1	0	0	0	0	0	0		64	1	0	1	0	0	0	0
	65	4	3	1	1	0	0	0		65	1	1	0	0	0	0	0	TOTAL	64	94	25	28	19	2	2	2		65	2	0	1	0	0	0	0
	66	3	2	0	0	0	0	0		66	2	1	0	0	0	0	0										TOTAL	65	188	33	53	23	8	8	7
	67	7	0	0	0	0	0	0		67	1	0	0	0	0	0	0
	68	5	0	0	0	0	0	0		68	3	1	1	1	0	0	0
	69	2	0	0	0	0	0	0		69	1	0	0	0	0	0	0
	70	3	0	0	0	0	0	0		70	1	0	0	0	0	0	0
	71	4	0	2	0	0	0	0		71	1	0	0	0	0	0	0
	72	6	1	3	1	0	0	0		72	2	0	1	0	0	0	0
	73	3	1	2	1	0	0	0		73	1	0	0	0	0	0	0
	74	4	1	1	1	0	0	0		74	1	0	0	0	0	0	0
	75	3	0	0	0	0	0	0		75	2	0	0	0	0	0	0
	76	1	0	1	0	0	0	0		76	2	0	0	0	0	0	0
	77	5	1	1	0	0	0	0		77	2	0	0	0	0	0	0
	78	3	0	1	0	0	0	0		78	2	0	0	0	0	0	0
	79	1	0	0	0	0	0	0		79	1	0	0	0	0	0	0
	80	9	1	2	1	0	0	0		80	2	0	0	0	0	0	0
TOTAL	80	261	54	65	30	4	3	3		81	1	0	0	0	0	0	0
										82	2	0	0	0	0	0	0
										83	1	1	1	1	0	0	0
										84	1	1	2	2	0	0	0
										85	1	1	3	2	0	0	0
										86	1	1	0	0	0	0	0
										87	1	1	0	0	0	0	0
										88	1	0	0	0	0	0	0
										89	2	0	0	0	0	0	0
										90	2	0	0	0	0	0	0
										91	3	0	1	0	0	0	0
									TOTAL	91	160	33	35	22	0	0	0
[truncated: 6 more columns]

## Sheet: Predation with ∆kilK (∆4655)
	Predation with ∆kilK (mxan_4655) M. xanthus (experiment 1)									Predation with ∆kilK (mxan_4655) M. xanthus (experiment 2)									Predation with ∆kilK (mxan_4655) M. xanthus (experiment 3)									Predation with ∆kilK (mxan_4655) M. xanthus (experiment 4)									Predation with ∆kilK (mxan_4655) M. xanthus (experiment 5)											E. coli cell #	Contacts with Myxo
	E. coli cell #	Contacts with Myxo	Total Pauses	KilD-nG clusters	KilD-nG cluster + pause	Lysis ?	Lysis + KilD-nG cluster	Lysis + KilD-nG cluster and pause		E. coli cell #	Contacts with Myxo	Total Pauses	KilD-nG clusters	KilD-nG cluster + pause	Lysis ?	Lysis + KilD-nG cluster	Lysis + KilD-nG cluster and pause		E. coli cell #	Contacts with Myxo	Total Pauses	KilD-nG clusters	KilD-nG cluster + pause	Lysis ?	Lysis + KilD-nG cluster	Lysis + KilD-nG cluster and pause		E. coli cell #	Contacts with Myxo	Total Pauses	KilD-nG clusters	KilD-nG cluster + pause	Lysis ?	Lysis + KilD-nG cluster	Lysis + KilD-nG cluster and pause		E. coli cell #	Contacts with Myxo	Total Pauses	KilD-nG clusters	KilD-nG cluster + pause	Lysis ?	Lysis + KilD-nG cluster	Lysis + KilD-nG cluster and pause			Exp 1	32	84
	1	1	1	1	1	1	1	1		1	5	0	0	0	0	0	0		1	1	0	0	0	0	0	0		1	1	1	1	1	1	1	1		1	2	1	1	1	1	1	1			Exp 2	60	233
	2	1	1	1	1	1	1	1		2	5	0	0	0	0	0	0		2	2	1	1	1	1	1	1		2	1	1	1	1	1	1	1		2	1	1	1	1	1	1	1			Exp 3	41	70
	3	2	0	0	0	0	0	0		3	3	0	0	0	0	0	0		3	2	1	1	1	1	1	1		3	2	1	0	0	1	0	0		3	7	0	0	0	0	0	0			Exp 4	74	140
	4	5	1	1	1	1	1	1		4	1	0	0	0	0	0	0		4	1	1	1	1	1	1	1		4	5	0		0	0	0	0		4	7	0	0	0	0	0	0			Exp 5	52	183
	5	3	1	1	1	1	1	1		5	1	0	0	0	0	0	0		5	1	1	1	1	1	1	1		5	2	0	1	0	0	0	0		5	7	0	1	0	0	0	0			TOTAL	259	710
	6	3	0	0	0	0	0	0		6	2	0	0	0	0	0	0		6	1	0	0	0	0	0	0		6	2	0	0	0	1	0	0		6	2	0	0	0	0	0	0
	7	1	1	0	0	0	0	0		7	2	0	0	0	0	0	0		7	1	0	0	0	0	0	0		7	1	1	1	1	1	1	1		7	1	0	0	0	0	0	0
	8	2	0	0	0	0	0	0		8	2	0	0	0	0	0	0		8	1	1	1	1	1	1	1		8	1	1	1	1	1	1	1		8	4	0	0	0	0	0	0
	9	5	0	2	0	0	0	0		9	1	0	0	0	0	0	0		9	2	2	0	0	0	0	0		9	1	0	0	0	0	0	0		9	1	1	1	1	1	1	1					Exp 1
	10	2	1	1	1	1	1	1		10	1	0	0	0	0	0	0		10	2	2	1	1	1	1	1		10	1	1	1	1	1	1	1		10	1	0	1	0	1	1	0				% contacts leading to motility pause	14.2857
	11	3	0	1	0	1	1	0		11	1	0	0	0	0	0	0		11	1	0	0	0	0	0	0		11	1	1	0	0	0	0	0		11	3	1	0	0	0	0	0				% contacts leading to KilD cluster formation	13.0952
	12	1	0	0	0	0	0	0		12	3	0	0	0	0	0	0		12	2	0	0	0	0	0	0		12	1	0	0	0	0	0	0		12	1	0	0	0	0	0	0				% contacts leading to cell lysis	15.4762
	13	3	1	0	0	0	0	0		13	1	0	0	0	1	0	0		13	3	0	1	0	0	0	0		13	2	1	1	1	1	1	1		13	2	0	0	0	0	0	0				% KilD clusters associated with motility pause	72.7273
	14	5	0	0	0	1	0	0		14	1	1	1	1	1	1	1		14	2	0	0	0	0	0	0		14	4	2	0	0	0	0	0		14	2	1	0	0	0	0	0				% KilD clusters leading to cell lysis	81.8182
	15	2	1	1	1	1	1	1		15	2	1	2	2	1	1	1		15	1	0	0	0	0	0	0		15	2	0	0	0	0	0	0		15	1	1	1	1	1	1	1				% KilD clusters associated with pause leading to cell lysis	100
	16	3	0	0	0	0	0	0		16	3	1	1	1	1	1	1		16	2	0	0	0	0	0	0		16	5	0	0	0	0	0	0		16	6	0	0	0	0	0	0
	17	7	0	0	0	0	0	0		17	6	0	0	0	0	0	0		17	2	1	1	1	1	1	1		17	4	1	0	0	0	0	0		17	2	1	1	1	1	1	1
	18	8	0	0	0	0	0	0		18	7	0	0	0	0	0	0		18	2	0	0	0	0	0	0		18	1	1	0	0	0	0	0		18	1	1	1	1	1	1	1
	19	2	1	0	0	1	0	0		19	3	0	0	0	0	0	0		19	2	1	0	0	1	0	0		19	2	2	1	1	1	1	1		19	1	1	0	0	0	0	0
	20	1	0	0	0	0	0	0		20	5	0	0	0	0	0	0		20	1	0	0	0	0	0	0		20	1	1	1	1	1	1	1		20	3	1	1	1	1	1	1
	21	1	1	1	1	1	1	1		21	4	0	0	0	0	0	0		21	3	1	0	0	0	0	0		21	1	1	1	0	1	1	0		21	3	0	1	0	0	0	0
	22	2	0	0	0	0	0	0		22	7	0	0	0	0	0	0		22	3	3	2	0	0	0	0		22	1	0	1	0	0	0	0		22	17	0	0	0	0	0	0
	23	5	0	0	0	1	0	0		23	6	0	0	0	0	0	0		23	3	1	0	0	0	0	0		23	1	0	0	0	0	0	0		23	4	1	1	1	1	1	1
	24	1	1	0	0	0	0	0		24	8	1	1	1	1	1	1		24	3	1	0	0	0	0	0		24	1	0	1	0	0	0	0		24	7	0	0	0	0	0	0
	25	1	0	0	0	1	0	0		25	3	0	0	0	0	0	0		25	2	2	1	1	0	0	0		25	1	0	0	0	0	0	0		25	1	1	1	1	1	1	1
	26	4	1	1	1	1	1	1		26	6	0	0	0	0	0	0		26	2	1	0	0	0	0	0		26	1	0	0	0	0	0	0		26	1	1	1	1	1	1	1
	27	1	0	0	0	0	0	0		27	9	0	0	0	0	0	0		27	1	1	1	1	1	1	1		27	1	1	1	1	1	1	1		27	1	0	1	0	1	1	0
	28	0	0	0	0	0	0	0		28	2	0	0	0	0	0	0		28	2	0	0	0	0	0	0		28	1	1	1	1	1	1	1		28	1	1	1	1	1	1	1
	29	6	0	0	0	0	0	0		29	1	0	0	0	0	0	0		29	2	0	0	0	0	0	0		29	1	0	0	0	0	0	0		29	1	1	2	2	1	1	1
	30	1	0	0	0	0	0	0		30	1	0	0	0	0	0	0		30	2	0	0	0	0	0	0		30	2	0	0	0	0	0	0		30	1	0	0	0	0	0	0
	31	1	0	0	0	0	0	0		31	5	0	0	0	0	0	0		31	1	1	1	1	1	1	1		31	2	0	0	0	0	0	0		31	5	0	0	0	0	0	0
	32	1	0	0	0	0	0	0		32	6	1	1	1	1	1	1		32	2	2	0	0	0	0	0		32	1	1	1	1	1	1	1		32	1	0	0	0	0	0	0
TOTAL	32	84	12	11	8	13	9	8		33	7	1	1	1	1	1	1		33	1	0	0	0	0	0	0		33	1	1	1	1	1	1	1		33	3	0	0	0	0	0	0
										34	5	1	1	1	1	1	1		34	1	1	0	0	1	0	0		34	2	0	0	0	0	0	0		34	1	0	0	0	0	0	0
										35	2	0	0	0	0	0	0		35	1	0	0	0	0	0	0		35	2	0	0	0	0	0	0		35	12	0	1	0	0	0	0
										36	2	1	1	1	1	1	1		36	3	1	0	0	0	0	0		36	2	0	0	0	0	0	0		36	8	0	0	0	0	0	0
										37	4	0	0	0	0	0	0		37	1	0	1	0	0	0	0		37	2	0	0	0	0	0	0		37	4	0	0	0	0	0	0
										38	5	0	0	0	0	0	0		38	2	0	0	0	0	0	0		38	1	1	1	1	1	1	1		38	4	1	1	1	1	1	1
										39	6	0	0	0	0	0	0		39	1	0	0	0	0	0	0		39	1	1	1	1	1	1	1		39	5	0	0	0	0	0	0
										40	3	0	0	0	0	0	0		40	1	1	0	0	0	0	0		40	2	0	0	0	0	0	0		40	1	1	1	1	1	1	1
										41	7	0	0	0	0	0	0		41	1	0	0	0	0	0	0		41	1	1	1	1	1	1	1		41	4	0	0	0	0	0	0
										42	7	0	0	0	0	0	0	TOTAL	41	70	27	14	10	11	9	9		42	1	1	1	1	1	1	1		42	1	0	0	0	0	0	0
										43	6	0	0	0	0	0	0											43	2	0	0	0	0	0	0		43	6	0	4	0	1	1	0
										44	3	0	0	0	0	0	0											44	3	0	0	0	0	0	0		44	5	1	0	0	0	0	0
										45	1	0	0	0	0	0	0											45	1	1	1	1	0	0	0		45	9	1	1	1	1	1	1
										46	3	0	0	0	0	0	0											46	2	0	0	0	0	0	0		46	1	0	0	0	0	0	0
										47	3	0	0	0	0	0	0											47	4	0	0	0	0	0	0		47	6	0	0	0	0	0	0
										48	1	0	0	0	0	0	0											48	5	0	0	0	0	0	0		48	1	0	0	0	0	0	0
										49	1	0	0	0	0	0	0											49	1	0	0	0	0	0	0		49	4	0	0	0	0	0	0
										50	4	0	0	0	0	0	0											50	1	0	0	0	0	0	0		50	3	0	0	0	0	0	0
										51	3	1	0	0	0	0	0											51	1	0	0	0	0	0	0		51	3	1	1	1	1	1	1
										52	2	1	0	0	0	0	0											52	1	0	0	0	0	0	0		52	4	1	1	1	1	1	1
										53	8	0	0	0	0	0	0											53	1	0	0	0	0	0	0	TOTAL	52	183	21	27	18	20	20	17
										54	11	0	0	0	0	0	0											54	1	0	0	0	0	0	0
										55	8	0	0	0	0	0	0											55	5	0	0	0	0	0	0
										56	11	0	0	0	0	0	0											56	6	1	1	1	1	1	1
										57	1	0	0	0	0	0	0											57	4	0	1	0	1	1	0
										58	1	0	0	0	0	0	0											58	1	1	1	1	1	1	1
										59	2	0	0	0	0	0	0											59	1	1	1	1	1	1	1
										60	3	0	0	0	0	0	0											60	3	0	0	0	0	0	0
									TOTAL	60	233	10	9	9	9	8	8											61	1	1	1	1	1	1	1
																												62	2	1	1	1	1	1	1
																												63	4	0	0	0	0	0	0
																												64	6	0	0	0	0	0	0
																												65	5	0	0	0	0	0	0
																												66	1	1	1	1	1	1	1
																												67	1	1	1	1	1	1	1
																												68	1	1	1	1	1	1	1
																												69	2	0	0	0	0	0	0
																												70	1	1	1	1	1	1	1
																												71	1	1	0	0	1	0	0
																												72	1	1	2	1	1	1	1
																												73	1	0	0	0	0	0	0
																												74	1	1	0	0	0	0	0
																											TOTAL	74	140	37	33	27	31	28	26
[truncated: 6 more columns]

## Sheet: Predation with ∆kilKLM pilins
	Predation with ∆kilKLM (mxan_4655-58-60) M. xanthus (experiment 1)									Predation with ∆kilKLM (mxan_4655-58-60) M. xanthus (experiment 2)									Predation with ∆kilKLM (mxan_4655-58-60) M. xanthus (experiment 3)									Predation with ∆kilKLM (mxan_4655-58-60) M. xanthus (experiment 4)									Predation with ∆kilKLM (mxan_4655-58-60) M. xanthus (experiment 5)											E. coli cell #	Contacts with Myxo
	E. coli cell #	Contacts with Myxo	Total Pauses	KilD-nG clusters	KilD-nG cluster + pause	Lysis ?	Lysis + KilD-nG cluster	Lysis + KilD-nG cluster and pause		E. coli cell #	Contacts with Myxo	Total Pauses	KilD-nG clusters	KilD-nG cluster + pause	Lysis ?	Lysis + KilD-nG cluster	Lysis + KilD-nG cluster and pause		E. coli cell #	Contacts with Myxo	Total Pauses	KilD-nG clusters	KilD-nG cluster + pause	Lysis ?	Lysis + KilD-nG cluster	Lysis + KilD-nG cluster and pause		E. coli cell #	Contacts with Myxo	Total Pauses	KilD-nG clusters	KilD-nG cluster + pause	Lysis ?	Lysis + KilD-nG cluster	Lysis + KilD-nG cluster and pause		E. coli cell #	Contacts with Myxo	Total Pauses	KilD-nG clusters	KilD-nG cluster + pause	Lysis ?	Lysis + KilD-nG cluster	Lysis + KilD-nG cluster and pause			Exp 1	77	281
	1	6	2	2	1	0	0	0		1	9	0	0	0	0	0	0		1	1	0	0	0	0	0	0		1	4	1	1	1	0	0	0		1	2	0	1	0	0	0	0			Exp 2	86	347
	2	6	0	1	0	0	0	0		2	6	1	1	1	1	1	1		2	2	0	0	0	0	0	0		2	6	0	3	0	0	0	0		2	1	0	2	0	0	0	0			Exp 3	85	304
	3	5	0	1	0	0	0	0		3	12	3	2	1	1	1	1		3	2	1	1	0	0	0	0		3	7	0	0	0	0	0	0		3	2	0	1	0	0	0	0			Exp 4	84	274
	4	4	0	2	0	0	0	0		4	6	1	3	1	1	1	1		4	2	0	0	0	0	0	0		4	5	0	2	0	0	0	0		4	8	0	0	0	0	0	0			Exp 5	67	240
	5	4	1	1	1	0	0	0		5	1	0	0	0	0	0	0		5	2	0	1	0	0	0	0		5	3	0	2	0	0	0	0		5	7	1	2	1	0	0	0			TOTAL	399	1446
	6	3	0	0	0	0	0	0		6	1	0	1	0	0	0	0		6	3	0	0	0	0	0	0		6	3	0	1	0	0	0	0		6	7	2	1	1	0	0	0
	7	3	0	1	0	0	0	0		7	1	0	1	0	0	0	0		7	3	0	0	0	0	0	0		7	4	0	2	0	0	0	0		7	3	1	1	0	0	0	0
	8	2	0	0	0	0	0	0		8	2	0	0	0	1	0	0		8	8	0	0	0	0	0	0		8	8	0	0	0	0	0	0		8	4	3	2	1	0	0	0
	9	3	0	1	0	0	0	0		9	1	0	0	0	0	0	0		9	7	0	0	0	0	0	0		9	2	0	0	0	0	0	0		9	3	0	1	0	0	0	0					Exp 1
	10	4	0	1	0	0	0	0		10	3	0	0	0	0	0	0		10	11	0	0	0	0	0	0		10	1	0	0	0	0	0	0		10	1	0	3	0	0	0	0				% contacts leading to motility pause	6.40569
	11	3	0	1	0	0	0	0		11	5	0	1	0	0	0	0		11	5	0	0	0	0	0	0		11	2	1	1	1	1	1	1		11	1	0	0	0	0	0	0				% contacts leading to KilD cluster formation	22.0641
	12	1	0	2	0	0	0	0		12	1	0	0	0	0	0	0		12	2	0	0	0	0	0	0		12	2	0	0	0	0	0	0		12	1	1	1	1	0	0	0				% contacts leading to cell lysis	2.4911
	13	1	0	0	0	0	0	0		13	1	1	1	1	1	1	1		13	3	0	0	0	0	0	0		13	2	1	1	1	1	1	1		13	2	1	1	1	0	0	0				% KilD clusters associated with motility pause	19.3548
	14	1	0	0	0	0	0	0		14	1	0	1	0	0	0	0		14	4	0	1	0	0	0	0		14	1	0	0	0	0	0	0		14	1	1	1	1	0	0	0				% KilD clusters leading to cell lysis	9.67742
	15	2	0	1	0	0	0	0		15	4	1	1	1	0	0	0		15	5	0	0	0	0	0	0		15	6	0	3	0	0	0	0		15	1	1	2	2	0	0	0				% KilD clusters associated with pause leading to cell lysis	50
	16	1	0	0	0	0	0	0		16	2	0	0	0	0	0	0		16	4	0	1	0	0	0	0		16	6	0	3	0	0	0	0		16	2	0	1	0	0	0	0
	17	1	0	0	0	0	0	0		17	1	0	0	0	0	0	0		17	2	0	1	0	0	0	0		17	3	0	0	0	0	0	0		17	3	0	1	0	0	0	0
	18	5	3	3	3	1	1	1		18	5	0	2	0	0	0	0		18	1	0	0	0	0	0	0		18	1	0	0	0	0	0	0		18	4	0	1	0	0	0	0
	19	2	0	2	0	0	0	0		19	1	0	0	0	0	0	0		19	1	0	1	0	0	0	0		19	2	0	1	0	0	0	0		19	4	0	0	0	0	0	0
	20	5	1	3	1	0	0	0		20	5	0	0	0	0	0	0		20	2	0	0	0	0	0	0		20	3	0	0	0	0	0	0		20	1	0	0	0	0	0	0
	21	7	0	0	0	0	0	0		21	1	0	0	0	0	0	0		21	8	0	1	0	0	0	0		21	5	0	2	0	0	0	0		21	5	0	1	0	0	0	0
	22	5	0	2	0	0	0	0		22	6	0	3	0	0	0	0		22	5	0	1	0	0	0	0		22	7	0	1	0	0	0	0		22	2	1	0	0	0	0	0
	23	6	0	0	0	0	0	0		23	4	1	2	1	1	1	1		23	9	0	1	0	0	0	0		23	9	0	3	0	0	0	0		23	3	0	1	0	0	0	0
	24	1	0	1	0	0	0	0		24	4	0	0	0	0	0	0		24	8	0	0	0	0	0	0		24	1	0	1	0	0	0	0		24	3	0	1	0	0	0	0
	25	4	0	0	0	0	0	0		25	10	0	2	0	0	0	0		25	3	0	2	0	0	0	0		25	5	0	1	0	0	0	0		25	4	0	1	0	0	0	0
	26	3	0	1	0	0	0	0		26	5	0	1	0	0	0	0		26	3	0	0	0	0	0	0		26	3	0	2	0	0	0	0		26	1	1	1	1	0	0	0
	27	3	0	0	0	0	0	0		27	1	1	1	1	1	1	1		27	10	0	1	0	0	0	0		27	3	0	2	0	0	0	0		27	2	1	0	0	0	0	0
	28	4	0	2	0	0	0	0		28	1	0	1	0	0	0	0		28	9	0	0	0	0	0	0		28	3	0	0	0	0	0	0		28	2	1	1	1	0	0	0
	29	4	0	1	0	0	0	0		29	1	0	0	0	0	0	0		29	3	0	2	0	0	0	0		29	1	0	0	0	0	0	0		29	1	1	1	0	0	0	0
	30	1	0	1	0	0	0	0		30	2	0	2	0	0	0	0		30	5	0	4	0	0	0	0		30	1	0	1	0	0	0	0		30	1	1	1	1	0	0	0
	31	10	0	2	0	0	0	0		31	2	0	1	0	0	0	0		31	3	0	4	0	0	0	0		31	2	0	1	0	0	0	0		31	4	0	0	0	0	0	0
	32	1	1	1	1	1	1	1		32	1	0	0	0	0	0	0		32	1	0	0	0	0	0	0		32	2	0	1	0	0	0	0		32	2	1	1	1	0	0	0
	33	1	0	1	0	0	0	0		33	2	0	0	0	0	0	0		33	3	0	2	0	0	0	0		33	1	0	0	0	0	0	0		33	6	3	1	1	0	0	0
	34	2	0	0	0	0	0	0		34	11	0	0	0	0	0	0		34	1	1	1	1	0	0	0		34	1	0	0	0	0	0	0		34	1	1	1	1	1	1	1
	35	1	0	0	0	0	0	0		35	6	0	0	0	0	0	0		35	1	0	0	0	0	0	0		35	4	0	3	0	0	0	0		35	2	0	1	0	0	0	0
	36	1	0	0	0	0	0	0		36	5	0	0	0	0	0	0		36	4	0	0	0	0	0	0		36	9	1	1	0	0	0	0		36	1	0	0	0	0	0	0
	37	4	0	0	0	0	0	0		37	6	0	0	0	0	0	0		37	2	0	1	0	0	0	0		37	6	0	2	0	0	0	0		37	9	2	1	1	0	0	0
	38	2	0	0	0	0	0	0		38	1	0	0	0	0	0	0		38	4	0	3	0	0	0	0		38	4	0	2	0	0	0	0		38	14	2	3	2	0	0	0
	39	3	0	0	0	0	0	0		39	1	1	1	1	1	1	1		39	4	0	2	0	0	0	0		39	4	2	1	0	0	0	0		39	5	0	2	0	0	0	0
	40	1	0	0	0	0	0	0		40	3	1	2	1	0	0	0		40	1	0	2	0	0	0	0		40	1	1	1	1	0	0	0		40	8	2	1	1	0	0	0
	41	2	0	0	0	0	0	0		41	2	2	1	1	1	1	1		41	6	0	2	0	0	0	0		41	1	1	1	1	0	0	0		41	13	1	1	1	0	0	0
	42	6	1	1	0	0	0	0		42	2	0	0	0	0	0	0		42	4	0	0	0	0	0	0		42	2	0	2	0	0	0	0		42	10	2	1	0	0	0	0
	43	5	1	2	0	0	0	0		43	2	0	0	0	0	0	0		43	3	0	3	0	0	0	0		43	3	1	3	1	0	0	0		43	2	1	1	0	0	0	0
	44	3	1	1	0	0	0	0		44	2	1	2	1	1	1	1		44	4	0	1	0	0	0	0		44	1	0	1	0	0	0	0		44	4	2	4	2	1	1	1
	45	1	0	0	0	0	0	0		45	1	1	1	1	1	1	1		45	9	0	0	0	0	0	0		45	1	0	0	0	0	0	0		45	2	1	2	1	0	0	0
	46	3	0	0	0	0	0	0		46	1	1	1	1	1	1	1		46	7	0	3	0	0	0	0		46	5	0	0	0	0	0	0		46	4	1	2	2	0	0	0
	47	8	1	1	0	0	0	0		47	1	1	1	1	1	1	1		47	5	0	2	0	0	0	0		47	7	0	1	0	0	0	0		47	7	1	1	1	0	0	0
	48	7	0	1	0	0	0	0		48	6	1	2	1	0	0	0		48	2	0	0	0	0	0	0		48	1	0	0	0	0	0	0		48	2	1	1	1	1	1	1
	49	2	0	0	0	0	0	0		49	6	1	1	1	1	1	1		49	4	0	2	0	0	0	0		49	2	0	0	0	0	0	0		49	3	1	1	1	0	0	0
	50	7	0	0	0	0	0	0		50	1	1	1	1	1	1	1		50	3	1	1	0	0	0	0		50	1	0	0	0	0	0	0		50	3	1	1	1	0	0	0
	51	1	1	1	1	1	1	1		51	1	1	1	1	1	1	1		51	8	0	0	0	0	0	0		51	5	0	0	0	0	0	0		51	4	0	1	0	0	0	0
	52	5	0	2	0	0	0	0		52	18	1	1	1	0	0	0		52	3	0	0	0	0	0	0		52	6	0	0	0	0	0	0		52	3	0	0	0	0	0	0
	53	4	0	0	0	0	0	0		53	3	1	1	1	0	0	0		53	2	0	0	0	0	0	0		53	7	0	1	0	0	0	0		53	1	1	1	2	0	0	0
	54	4	0	0	0	0	0	0		54	5	0	0	0	0	0	0		54	4	0	0	0	0	0	0		54	2	0	1	0	0	0	0		54	2	1	1	1	1	1	1
	55	4	0	1	0	0	0	0		55	8	0	2	0	0	0	0		55	4	1	0	0	0	0	0		55	1	1	1	1	0	0	0		55	4	1	1	1	0	0	0
	56	5	0	1	0	0	0	0		56	2	0	0	0	0	0	0		56	3	1	3	0	0	0	0		56	1	1	1	1	0	0	0		56	3	0	1	0	0	0	0
	57	1	0	0	0	0	0	0		57	5	0	0	0	0	0	0		57	8	2	1	0	0	0	0		57	2	0	0	0	0	0	0		57	1	0	0	0	0	0	0
	58	1	0	0	0	0	0	0		58	5	1	0	0	0	0	0		58	6	2	3	2	1	1	1		58	2	0	0	0	0	0	0		58	5	0	0	0	0	0	0
	59	11	0	3	0	0	0	0		59	4	1	1	0	0	0	0		59	2	0	1	0	0	0	0		59	1	0	0	0	0	0	0		59	1	1	1	1	1	1	1
	60	1	0	0	0	0	0	0		60	5	1	1	1	1	1	1		60	2	0	0	0	0	0	0		60	5	0	0	0	0	0	0		60	6	0	3	0	0	0	0
	61	3	0	0	0	0	0	0		61	3	0	0	0	0	0	0		61	4	1	1	0	0	0	0		61	4	0	0	0	0	0	0		61	1	1	1	1	0	0	0
	62	2	0	1	0	0	0	0		62	5	0	1	0	0	0	0		62	1	0	1	0	0	0	0		62	3	0	0	0	0	0	0		62	9	1	3	0	0	0	0
	63	1	0	0	0	0	0	0		63	5	0	1	0	0	0	0		63	3	0	1	0	0	0	0		63	1	0	0	0	0	0	0		63	2	0	1	0	0	0	0
	64	7	1	2	1	1	1	1		64	8	2	0	0	0	0	0		64	2	0	1	0	0	0	0		64	10	0	2	0	0	0	0		64	5	2	2	0	0	0	0
	65	6	0	2	0	0	0	0		65	4	1	0	0	0	0	0		65	2	0	2	0	0	0	0		65	3	1	1	0	0	0	0		65	1	0	0	0	0	0	0
	66	2	1	2	2	1	1	1		66	2	0	0	0	0	0	0		66	1	0	0	0	0	0	0		66	1	1	2	2	0	0	0		66	5	0	1	0	0	0	0
	67	2	0	0	0	0	0	0		67	1	0	0	0	0	0	0		67	5	0	0	0	0	0	0		67	5	1	2	1	0	0	0		67	3	0	4	0	0	0	0
	68	1	0	1	0	0	0	0		68	1	0	0	0	0	0	0		68	3	0	1	0	0	0	0		68	5	1	5	2	0	0	0	TOTAL	67	240	48	77	34	5	5	5
	69	22	0	3	0	0	0	0		69	3	0	1	0	0	0	0		69	2	0	0	0	0	0	0		69	1	1	1	1	0	0	0
	70	4	1	0	0	1	0	0		70	7	0	1	0	0	0	0		70	2	0	0	0	0	0	0		70	1	0	1	0	0	0	0
	71	3	1	1	1	1	1	1		71	6	0	2	0	0	0	0		71	2	0	0	0	0	0	0		71	1	0	1	0	0	0	0
	72	3	0	0	0	0	0	0		72	15	0	1	0	0	0	0		72	1	0	0	0	0	0	0		72	2	0	1	0	0	0	0
	73	1	0	0	0	0	0	0		73	8	0	1	0	0	0	0		73	5	0	1	0	0	0	0		73	1	1	1	1	0	0	0
	74	4	0	0	0	0	0	0		74	5	0	1	0	0	0	0		74	3	0	1	0	0	0	0		74	6	2	1	1	0	0	0
	75	5	0	1	0	0	0	0		75	4	0	1	0	0	0	0		75	5	0	0	0	0	0	0		75	5	1	1	1	0	0	0
	76	7	0	1	0	0	0	0		76	9	0	1	0	0	0	0		76	4	0	0	0	0	0	0		76	1	1	1	1	0	0	0
	77	1	1	0	0	0	0	0		77	2	0	0	0	0	0	0		77	3	0	0	0	0	0	0		77	3	0	0	0	0	0	0
TOTAL	77	281	18	62	12	7	6	6		78	8	0	1	0	0	0	0		78	1	0	0	0	0	0	0		78	1	0	0	0	0	0	0
										79	2	0	2	0	0	0	0		79	1	0	0	0	0	0	0		79	5	0	1	0	0	0	0
										80	1	0	1	0	0	0	0		80	1	0	0	0	0	0	0		80	2	0	0	0	0	0	0
										81	2	1	1	1	1	1	1		81	2	0	0	0	0	0	0		81	2	0	0	0	0	0	0
										82	6	1	1	1	1	1	1		82	2	0	0	0	0	0	0		82	6	0	0	0	0	0	0
										83	7	0	4	0	0	0	0		83	1	0	1	0	0	0	0		83	5	0	0	0	0	0	0
										84	6	0	0	0	0	0	0		84	1	0	1	0	0	0	0		84	1	0	1	0	0	0	0
										85	4	1	1	1	1	1	1		85	1	0	1	0	0	0	0	TOTAL	84	274	21	79	18	2	2	2
										86	2	0	1	0	0	0	0	TOTAL	85	304	10	67	3	1	1	1
									TOTAL	86	347	32	70	24	20	19	19
[truncated: 6 more columns]
