# Supplementary material for: A Tad-like apparatus is required for contact-dependent prey killing in predatory social bacteria
Source: eLife. 2021 Sep 10;10:e72409. doi: 10.7554/eLife.72409 (PMC8460266; doi:10.7554/eLife.72409)
Supplement: Figure 4—figure supplement 1—source data 1. [file elife-72409-fig4-figsupp1-data1.xlsx]

## Sheet: CPRG assay
100 µl E. coli OD600= 10			Figure 4-figure supplement 1- source data
100 µl M. xanthus OD600= 0.5
24 h incubation
		Exp1	25 µl of cell lysat used		8 min incubation
		<>	1	2	3	4	average	Background substraction	Miller Units
	WT	A	0.6215	0.626	0.6223	0.6146	0.6211	0.5735	2867.5
	∆kilACF	B	0.0736	0.0731	0.0719	0.0717	0.072575	0.024975	124.875
	NG-kilF	C	0.5655	0.5663	0.5528	0.5601	0.561175	0.513575	2567.88
	NG-kilD	D	0.5546	0.5448	0.5416	0.5373	0.544575	0.496975	2484.88
			9	10
	CF	A	0.0476	0.0476	/	/	0.0476	0	0
	Mx	B	0.048	0.0505	/	/	0.04925	0.00165	8.25
	Ec	C	0.0513	0.0517	/	/	0.0515	0.0039	19.5
		Exp2	25 µl of cell lysat used		8 min incubation
		<>	5	6	7	8	average	Background substraction	Miller Units
	WT	A	0.6155	0.6162	0.6208	0.613	0.616375	0.569175	2845.88
	∆kilACF	B	0.0758	0.0734	0.0745	0.0785	0.07555	0.02835	141.75
	NG-kilF	C	0.5502	0.5457	0.5341	0.5459	0.543975	0.496775	2483.88
	NG-kilD	D	0.4926	0.5122	0.4984	0.4619	0.491275	0.444075	2220.37
			11	12
	CF	A	0.0469	0.0475	/	/	0.0472	0	0
	Mx	B	0.0495	0.0501	/	/	0.0498	0.0026	13
	Ec	C	0.0561	0.0532	/	/	0.05465	0.00745	37.25
