# Supplementary material for: A Tad-like apparatus is required for contact-dependent prey killing in predatory social bacteria
Source: eLife. 2021 Sep 10;10:e72409. doi: 10.7554/eLife.72409 (PMC8460266; doi:10.7554/eLife.72409)
Supplement: Figure 4—figure supplement 2—source data 1. [file elife-72409-fig4-figsupp2-data1.xlsx]

## Sheet: CPRG assay
in 96-well plate			Figure 4-figure supplement 2 - source data
100 µl E. coli OD600= 10
100 µl M. xanthus OD600= 0.5
24 h incubation
	experiment 1 - (25 µl of cell lysat / 10 min incubation)					Bckgrd sub.				Miller units
	<>	5	6	7	8	5	6	7	8	5	6	7	8
WT-EV clone 5	A	0.2803	0.2571	0.2636	0.267	0.2368	0.2136	0.2201	0.2235	947.2	854.4	880.4	894
∆kilG (∆mxan_4651)-EV clone 6	B	0.0601	0.0588	0.0607	0.0607	0.0166	0.0153	0.0172	0.0172	66.4	61.2	68.8	68.8
∆kilG + PpilA-kilG (mxan_4651) clone 1	C	0.4166	0.3631	0.3367	0.3281	0.3731	0.3196	0.2932	0.2846	1492.4	1278.4	1172.8	1138.4
∆kilG + PpilA-kilG-NG (mxan_4651) clone 5.1	D	0.0853	0.0857	0.0816	0.0785	0.0418	0.0422	0.0381	0.035	167.2	168.8	152.4	140
∆kilG + PpilA-kilG-NG (mxan_4651) clone 5.2	E	0.065	0.0662	0.0655	0.0641	0.0215	0.0227	0.022	0.0206	86	90.8	88	82.4
Ec alone	F	0.0453	0.0446	0.0458	0.0442	0.0018	0.0011	0.0023	0.000699999	7.2	4.39999	9.2	2.8
Mx alone	G	0.0438	0.0437	0.0441	0.0449	0.000299999	0.000199998	0.000600001	0.0014	1.2	0.799991	2.4	5.6
CF	H	0.0432	0.0445	0.0429	0.0434
	Average CF	0.0435
