# Supplementary material for: A Tad-like apparatus is required for contact-dependent prey killing in predatory social bacteria
Source: eLife. 2021 Sep 10;10:e72409. doi: 10.7554/eLife.72409 (PMC8460266; doi:10.7554/eLife.72409)
Supplement: Figure 4—figure supplement 3—source data 1. [file elife-72409-fig4-figsupp3-data1.xlsx]

## Sheet: Lysis time
Figure 4-figure supplement 3-source data 1
Lysis time (min) for WT DZ2
1
1
1.5
1
3
2
1.5
1.5
1
1.5
1
2
2.5
2.5
1
1.5
4
9.5
5
2
3
6
1.5
1.5
2.5
1
2.5
2.5
1.5
2
1.5
2
1.5
1.5
1.5
5
1.5
6
1
3
2.5
1.5
1
1.5
1
2.5
2
2
2
2.5
1.5
2
1.5
2
2
1.5
2
1.5
2.5
1.5
3
