# Supplementary material for: A Tad-like apparatus is required for contact-dependent prey killing in predatory social bacteria
Source: eLife. 2021 Sep 10;10:e72409. doi: 10.7554/eLife.72409 (PMC8460266; doi:10.7554/eLife.72409)
Supplement: Figure 5—figure supplement 2—source data 1. [file elife-72409-fig5-figsupp2-data1.xlsx]

## Sheet: Sheet1
Growth curves in CYE			Figure 5-figure supplement 2-source data 1
OD600
			DZ2 WT			DZ2 ∆kilACF
	hours	culture 1	culture 2	culture 3	culture 1	culture 2	culture 3
	0	0.066	0.061	0.079	0.068	0.073	0.079
	4	0.073	0.095	0.078	0.089	0.082	0.087
	8	0.131	0.136	0.124	0.144	0.131	0.141
	12	0.225	0.195	0.212	0.241	0.23	0.22
	16	0.287	0.29	0.324	0.315	0.281	0.292
	20	0.464	0.47	0.564	0.499	0.445	0.476
	24	0.812	0.653	0.582	0.667	0.55	0.572
	28	1.47	1.28	1.65	1.34	1.53	1.49
	32	2.09	2.4	3.6	2.27	2.27	1.94
	36	2.97	2.74	4.12	2.43	2.73	2.58
	40	4.5	4.12	5.62	4.87	4.85	4.39
	44	5.04	5.21	5.55	5.23	4.88	4.83
	48	5.27	6.08	9.02	6.26	7.12	5.9
	52	5.25	5.07	9.1	5.19	5.63	8.34
	56	5.19	5.59	10.36	8.4	6.3	6.06
