# Supplementary material for: A Tad-like apparatus is required for contact-dependent prey killing in predatory social bacteria
Source: eLife. 2021 Sep 10;10:e72409. doi: 10.7554/eLife.72409 (PMC8460266; doi:10.7554/eLife.72409)
Supplement: Figure 5—source data 1. [file elife-72409-fig5-data1.xlsx]

## Sheet: Figure 5c
Ec = Escherichia coli mCherry				Figure 5c - source data
Mx = Myxococcus xanthus GFP
experiment 1			FSC= 331	SSC= 314	FL1 = 818	FL3= 880	Treshold= 0.13		Compensation= 2.55%		500000 counts
	WT (event counts)				∆kilACF (∆3105-07) (event counts)
hours	Mx sample A	Ec sample A	Mx sample B	Ec sample B	Mx sample A	Ec sample A	Mx sample B	Ec sample B
0	108641	361021	122073	340355	121005	340951	125672	346117
24	205210	286049	257955	240985	226292	262777	216561	270207
48	492873	63	492705	24	278928	215546	246290	244460
72	492995	22	495322	48	256018	226387	228563	273464
						WT
						hours	total events A	total events B	% events E. coli A	% events E. coli B	Average % E. coli events 0h	ratio(xh E. coli events A /average 0h)	ratio(xh E. coli events B /average 0h)
						0	469662	462428	76.8683	73.6017	75.235	1.02171	0.978291
						24	491259	498940	58.2277	48.2994		0.773945	0.64198
						48	492936	492729	0.0127806	0.00487083		0.000169875	6.47416e-05
						72	493017	495370	0.00446232	0.00968973		5.93118e-05	0.000128793
						∆kilACF (∆3105-07)
						hours	total events A	total events B	% events E. coli A	% events E. coli B	Average % E. coli events 0h	ratio(xh E. coli events A /average 0h)	ratio(xh E. coli events B /average 0h)
						0	461956	471789	73.8059	73.3627	73.5843	1.00301	0.996988
						24	489069	486768	53.73	55.5104		0.730183	0.754379
						48	494474	490750	43.591	49.8136		0.592395	0.676959
						72	482405	502027	46.9288	54.472		0.637756	0.740266
experiment 2			FSC= 310	SSC= 345	FL1 = 800	FL3= 898	Treshold= 0.10		Compensation= 3.68 %		500000 counts
	WT (event counts)								∆kilACF (∆3105-07) (event counts)
hours	Mx sample A	Ec sample A	Mx sample B	Ec sample B	Mx sample C	Ec sample C	Mx sample D	Ec sample D	Mx sample A	Ec sample A	Mx sample B	Ec sample B	Mx sample C	Ec sample C	Mx sample D	Ec sample D
0	333071	204825	316206	212834	339962	200070	322675	212865	280759	235741	252315	256614	276638	231389	237702	267951
24	348233	173167	316871	202507	340238	175490	358028	156007	226326	291024	241458	272798	235247	277395	195090	317750
48	493321	1351	492184	1024	492075	227	473307	32380	215160	297485	287221	238905	203754	310701	205096	312251
72	489535	75	488906	73	489731	84	491117	60	283525	254127	179120	339900	185341	348143	230122	308739
						WT
						hours	total events A	total events B	total events C	total events D	% events E. coli A	% events E. coli B	% events E. coli C	% events E. coli D	Average % E. coli events 0h	ratio(xh E. coli events A /average 0h)	ratio(xh E. coli events B /average 0h)	ratio(xh E. coli events C /average 0h)	ratio(xh E. coli events D /average 0h)
						0	537896	529040	540032	535540	38.0789	40.2302	37.0478	39.7477	38.7762	0.982019	1.0375	0.955427	1.02506
						24	521400	519378	515728	514035	33.2119	38.9903	34.0276	30.3495		0.856504	1.00552	0.87754	0.782684
						48	494672	493208	492302	505687	0.27311	0.20762	0.0461099	6.40317		0.00704325	0.00535433	0.00118913	0.165132
						72	489610	488979	489815	491177	0.0153183	0.0149291	0.0171493	0.0122156		0.000395045	0.000385006	0.000442265	0.000315027
						∆kilACF (∆3105-07)
						hours	total events A	total events B	total events C	total events D	% events E. coli A	% events E. coli B	% events E. coli C	% events E. coli D	Average % E. coli events 0h	ratio(xh E. coli events A /average 0h)	ratio(xh E. coli events B /average 0h)	ratio(xh E. coli events C /average 0h)	ratio(xh E. coli events D /average 0h)
						0	516500	508929	508027	505653	45.642	50.4224	45.5466	52.9911	48.6505	0.938161	1.03642	0.9362	1.08922
						24	517350	514256	512642	512840	56.2528	53.0471	54.1109	61.9589		1.15626	1.09037	1.11224	1.27355
						48	512645	526126	514455	517347	58.0294	45.4083	60.3942	60.3562		1.19278	0.933358	1.24139	1.24061
						72	537652	519020	533484	538861	47.2661	65.4888	65.2584	57.2947		0.971543	1.34611	1.34137	1.17768

## Sheet: Figure 5d
Ec = Escherichia coli mCherry					Figure 5d - source data
Mx = Myxococcus xanthus GFP
experiment 1																					experiment 2																					experiment 3
FSC= 285	SSC= 370	FL1 = 736	FL3= 851	Treshold= 0.09		Compensation= 6.51%		500000 counts													FSC= 341	SSC= 351	FL1 = 787	FL3= 903	Treshold= 0.12		Compensation= 5.08%		500000 counts													FSC= 318	SSC= 333	FL1 = 798	FL3= 902	Treshold= 0.11		Compensation= 3.67%
	WT (events counts)							WT														WT (event counts)							WT														WT (event counts)
hours	Mx sample A	Ec sample A	Mx sample B	Ec sample B	Mx sample C	Ec sample C		hours	total events A	total events B	total events C	% events E. coli A	% events E. coli B	% events E. coli C	Average % E. coli events 0h	ratio(48h E. coli events A /average 0h)	ratio(48h E. coli events B /average 0h)	ratio(48h E. coli events C /average 0h)			hours	Mx sample A	Ec sample A	Mx sample B	Ec sample B	Mx sample C	Ec sample C		hours	total events A	total events B	total events C	% events E. coli A	% events E. coli B	% events E. coli C	Average % E. coli events 0h	ratio(48h E. coli events A /average 0h)	ratio(48h E. coli events B /average 0h)	ratio(48h E. coli events C /average 0h)			hours	Mx sample A	Ec sample A	Mx sample B	Ec sample B	Mx sample C	Ec sample C
0	122189	346783	126662	347164	137904	337398		0	468972	473826	475302	73.9454	73.2682	70.986	72.7332	0.521306	0.0118719	0.0438824			0	142384	305610	127546	317472	134559	312974		0	447994	445018	447533	68.2174	71.3391	69.9332	69.8299	0.0266842	0.0276972	0.0207178			0	263790	247670	282490	228599	256705	257194
48	318361	194432	492191	4287	487604	16076		48	512793	496478	503680	37.9163	0.863482	3.19171							48	489537	9295	487568	9616	490068	7194		48	498832	497184	497262	1.86335	1.93409	1.44672							48	493263	42	493334	59	493642	36
	∆kilC (∆Mxan_3106) (events counts)							∆kilC (∆Mxan_3106)														∆kilC (∆Mxan_3106) (events counts)							∆kilC (∆Mxan_3106)														∆kilC (∆Mxan_3106) (events counts)
hours	Mx sample A	Ec sample A	Mx sample B	Ec sample B	Mx sample C	Ec sample C		hours	total events A	total events B	total events C	% events E. coli A	% events E. coli B	% events E. coli C	Average % E. coli events 0h	ratio(48h E. coli events A /average 0h)	ratio(48h E. coli events B /average 0h)	ratio(48h E. coli events C /average 0h)			hours	Mx sample A	Ec sample A	Mx sample B	Ec sample B	Mx sample C	Ec sample C		hours	total events A	total events B	total events C	% events E. coli A	% events E. coli B	% events E. coli C	Average % E. coli events 0h	ratio(48h E. coli events A /average 0h)	ratio(48h E. coli events B /average 0h)	ratio(48h E. coli events C /average 0h)			hours	Mx sample A	Ec sample A	Mx sample B	Ec sample B	Mx sample C	Ec sample C
0	135189	343974	142986	338106	140713	345248		0	479163	481092	485961	71.7864	70.2789	71.0444	71.0366	1.1726	1.2187	1.22996			0	225733	250712	201696	267616	192426	277241		0	476445	469312	469667	52.6214	57.023	59.0293	56.2246	0.974063	1.38211	1.32501			0	269208	243554	255927	255220	276236	234939
48	79126	394604	63051	406510	59333	410528		48	473730	469561	469861	83.2972	86.5724	87.3722							48	215873	261366	98824	344503	116341	339864		48	477239	443327	456205	54.7663	77.7086	74.4981							48	195989	330188	77865	428729	82844	427869
	∆kilF (∆Mxan_3107) (events counts)							∆kilF (∆Mxan_3107)														∆kilF (∆Mxan_3107) (events counts)							∆kilF (∆Mxan_3107)														∆kilF (∆Mxan_3107) (events counts)
hours	Mx sample A	Ec sample A	Mx sample B	Ec sample B	Mx sample C	Ec sample C		hours	total events A	total events B	total events C	% events E. coli A	% events E. coli B	% events E. coli C	Average % E. coli events 0h	ratio(48h E. coli events A /average 0h)	ratio(48h E. coli events B /average 0h)	ratio(48h E. coli events C /average 0h)			hours	Mx sample A	Ec sample A	Mx sample B	Ec sample B	Mx sample C	Ec sample C		hours	total events A	total events B	total events C	% events E. coli A	% events E. coli B	% events E. coli C	Average % E. coli events 0h	ratio(48h E. coli events A /average 0h)	ratio(48h E. coli events B /average 0h)	ratio(48h E. coli events C /average 0h)			hours	Mx sample A	Ec sample A	Mx sample B	Ec sample B	Mx sample C	Ec sample C
0	149051	341942	180891	315094	143250	341238		0	490993	495985	484488	69.6429	63.5289	70.4327	67.8682	1.19683	0.591856	0.717862			0	151913	301930	141099	312777	179815	334591		0	453843	453876	514406	66.5274	68.9124	65.0441	66.828	1.04308	1.13912	1.23665			0	232968	283199	240668	279799	238097	290764
48	89217	386021	308607	207184	260268	247275		48	475238	515791	507543	81.2269	40.1682	48.72							48	140343	322943	107956	344222	77209	367620		48	463286	452178	444829	69.707	76.1253	82.643							48	340136	221508	42934	459976	62713	446545
	∆kilACF (∆Mxan_3105-07) (events counts)							∆kilACF (∆Mxan_3105-07)														∆kilACF (∆Mxan_3105-07) (events counts)							∆kilACF (∆Mxan_3105-07)														∆kilACF (∆Mxan_3105-07) (events counts)
hours	Mx sample A	Ec sample A	Mx sample B	Ec sample B	Mx sample C	Ec sample C		hours	total events A	total events B	total events C	% events E. coli A	% events E. coli B	% events E. coli C	Average % E. coli events 0h	ratio(48h E. coli events A /average 0h)	ratio(48h E. coli events B /average 0h)	ratio(48h E. coli events C /average 0h)			hours	Mx sample A	Ec sample A	Mx sample B	Ec sample B	Mx sample C	Ec sample C		hours	total events A	total events B	total events C	% events E. coli A	% events E. coli B	% events E. coli C	Average % E. coli events 0h	ratio(48h E. coli events A /average 0h)	ratio(48h E. coli events B /average 0h)	ratio(48h E. coli events C /average 0h)			hours	Mx sample A	Ec sample A	Mx sample B	Ec sample B	Mx sample C	Ec sample C
0	136846	340408	164114	316176	24955	274342		0	477254	480290	299297	71.3264	65.8302	91.6621	76.2729	1.19587	1.15645	1.10511			0	156790	298570	165810	294473	169203	295543		0	455360	460283	464746	65.5679	63.9765	63.5924	64.3789	1.33959	1.33355	0.701179			0	174059	339946	206988	307841	215097	284065
48	41049	426100	55317	413709	74313	398720		48	467149	469026	473033	91.2129	88.206	84.2901							48	60175	377192	61740	374654	279411	229916		48	437367	436394	509327	86.2415	85.8522	45.1411							48	236717	303448	226120	320389	186837	358195
	∆kilH (∆Mxan_4650) (events counts)							∆kilH (∆Mxan_4650)														∆kilH (∆Mxan_4650) (events counts)							∆kilH (∆Mxan_4650)														∆kilH (∆Mxan_4650) (events counts)
hours	Mx sample A	Ec sample A	Mx sample B	Ec sample B	Mx sample C	Ec sample C		hours	total events A	total events B	total events C	% events E. coli A	% events E. coli B	% events E. coli C	Average % E. coli events 0h	ratio(48h E. coli events A /average 0h)	ratio(48h E. coli events B /average 0h)	ratio(48h E. coli events C /average 0h)			hours	Mx sample A	Ec sample A	Mx sample B	Ec sample B	Mx sample C	Ec sample C		hours	total events A	total events B	total events C	% events E. coli A	% events E. coli B	% events E. coli C	Average % E. coli events 0h	ratio(48h E. coli events A /average 0h)	ratio(48h E. coli events B /average 0h)	ratio(48h E. coli events C /average 0h)			hours	Mx sample A	Ec sample A	Mx sample B	Ec sample B	Mx sample C	Ec sample C
0	174546	300949	173520	302441	153564	319790		0	475495	475961	473354	63.2917	63.5432	67.5583	64.7978	0.376715	0.801808	1.27773			0	197420	272109	194595	274290	180193	284107		0	469529	468885	464300	57.9536	58.4984	61.1904	59.2141	1.029	0.995359	1.0595			0	214357	313757	136141	382152	183714	352108
48	384590	124196	237810	257167	81483	392088		48	508786	494977	473571	24.4103	51.9553	82.7939							48	185976	290047	200233	287418	176510	297181		48	476023	487651	473691	60.9313	58.9393	62.7373							48	32578	465026	31791	468248	327849	189340
	∆kilK (∆Mxan_4655) (events counts)							∆kilK (∆Mxan_4655)														∆kilK (∆Mxan_4655) (events counts)							∆kilK (∆Mxan_4655)														∆kilK (∆Mxan_4655) (events counts)
hours	Mx sample A	Ec sample A	Mx sample B	Ec sample B	Mx sample C	Ec sample C		hours	total events A	total events B	total events C	% events E. coli A	% events E. coli B	% events E. coli C	Average % E. coli events 0h	ratio(48h E. coli events A /average 0h)	ratio(48h E. coli events B /average 0h)	ratio(48h E. coli events C /average 0h)			hours	Mx sample A	Ec sample A	Mx sample B	Ec sample B	Mx sample C	Ec sample C		hours	total events A	total events B	total events C	% events E. coli A	% events E. coli B	% events E. coli C	Average % E. coli events 0h	ratio(48h E. coli events A /average 0h)	ratio(48h E. coli events B /average 0h)	ratio(48h E. coli events C /average 0h)			hours	Mx sample A	Ec sample A	Mx sample B	Ec sample B	Mx sample C	Ec sample C
0	138480	341109	137279	341233	124290	351666		0	479589	478512	475956	71.1253	71.3113	73.8862	72.1076	0.53345	0.574624	0.575588			0	100445	339088	115710	330864	103741	337730		0	439533	446574	441471	77.1473	74.0894	76.5011	75.9126	0.869149	0.590551	0.944134			0	159697	368463	151666	374784	179358	357655
48	308276	192707	295783	209266	293654	208355		48	500983	505049	502009	38.4658	41.4348	41.5042							48	157723	305887	268334	218045	127421	322379		48	463610	486379	449800	65.9794	44.8303	71.6716							48	202985	325783	178691	345478	120234	485819
	∆kilKLM (∆Mxan_4655_4658_4660) (events counts)							∆kilKLM (∆Mxan_4655-58-60)														∆kilKLM (∆Mxan_4655_4658_4660) (events counts)							∆kilKLM (∆Mxan_4655-58-60)														∆kilKLM (∆Mxan_4655_4658_4660) (events counts)
hours	Mx sample A	Ec sample A	Mx sample B	Ec sample B	Mx sample C	Ec sample C		hours	total events A	total events B	total events C	% events E. coli A	% events E. coli B	% events E. coli C	Average % E. coli events 0h	ratio(48h E. coli events A /average 0h)	ratio(48h E. coli events B /average 0h)	ratio(48h E. coli events C /average 0h)			hours	Mx sample A	Ec sample A	Mx sample B	Ec sample B	Mx sample C	Ec sample C		hours	total events A	total events B	total events C	% events E. coli A	% events E. coli B	% events E. coli C	Average Total events 0h	ratio(48h E. coli events A /average. 0h)	ratio(48h E. coli events B /average. 0h)	ratio(48h E. coli events C /average. 0h)			hours	Mx sample A	Ec sample A	Mx sample B	Ec sample B	Mx sample C	Ec sample C
0	154208	323091	161721	315444	139133	335864		0	477299	477165	474997	67.6915	66.108	70.7087	68.1694	1.36144	1.03683	1.30869			0	165491	288230	173008	286606	170875	286154		0	453721	459614	457029	63.5258	62.358	62.6118	62.8319	1.08652	0.608061	1.13729			0	175375	367967	193680	347536	172955	367222
48	33226	428796	142853	344370	50399	416790		48	462022	487223	467189	92.8086	70.6802	89.2123							48	144960	311870	304542	188289	132674	332167		48	456830	492831	464841	68.2683	38.2056	71.4582							48	239722	294898	202078	328285	164688	360947
[truncated: 11 more columns]
