# Supplementary material for: A Tad-like apparatus is required for contact-dependent prey killing in predatory social bacteria
Source: eLife. 2021 Sep 10;10:e72409. doi: 10.7554/eLife.72409 (PMC8460266; doi:10.7554/eLife.72409)
Supplement: Figure 5—source data 2. [file elife-72409-fig5-data2.xlsx]

## Sheet: Figure 5e
		Figure 5e - source data
		M. xanthus growth during prey colony invasion
			mother cell	daughter cell
		Time (seconds)	WT (tb51a)	WT (tb51b)	∆kilACF (tb366a)
		0	8.21931		6.15287
		30	8.07489		5.98875
		60	8.15381		6.02744
		90	8.21488		6.09257
		120	8.29695		6.16727
		150	8.16282		6.09644
		180	7.96707		6.01914
		210	8.22294		6.28953
		240	8.16054		6.20238
		270	8.17694		5.73935
		300	7.84715		6.03664
		330	7.92232		6.40385
		360	7.9674		5.99815
		390	8.14		6.04789
		420	8.30788		5.7995
		450	8.24351		6.1208
		480	8.02321		6.08344
		510	7.92731		5.91352
		540	8.16835		6.0128
		570	8.20625		5.9943
		600	8.30541		5.91525
		630	8.37088		6.06972
		660	8.02274		6.2733
		690	8.31243		6.04558
		720	8.2721		6.18877
		750	8.3581		5.78577
		780	8.19551		5.92234
		810	8.12342		5.84075
		840	8.24438		6.07334
		870	8.22369		6.03443
		900	8.27099		6.04661
		930	8.31258		5.86555
		960	8.3973		5.92687
		990	8.44775		6.08165
		1020	8.48448		6.07048
		1050	8.41568		6.13364
		1080	8.56825		6.16952
		1110	8.59709		5.9979
		1140	8.42567		6.09221
		1170	8.50746		5.77355
		1200	8.27722		6.21426
		1230	8.38478		6.11869
		1260	8.18556		6.32362
		1290	8.415		6.0141
		1320	8.51438		5.56912
		1350	8.35816		5.92295
		1380	8.81218		5.72067
		1410	8.73834		5.66802
		1440	8.5754		6.05195
		1470	8.64771		5.9318
		1500	8.60395		5.9141
		1530	8.4991		6.07248
		1560	8.6925		5.84898
		1590	8.56318		5.86624
		1620	8.6578		6.00332
		1650	8.71705		6.09404
		1680	8.65339		5.90797
		1710	8.55313		5.64766
		1740	8.65034		5.8659
		1770	8.55859		6.12101
		1800	8.67099		6.09947
		1830	8.63684		6.24717
		1860	8.77603		5.94836
		1890	8.78991		6.09942
		1920	8.59903		5.94123
		1950	8.69519		5.87312
		1980	8.74497		6.03533
		2010	8.30468		5.81815
		2040	8.45425		5.76028
		2070	8.3409		5.90766
		2100	8.53631		6.29836
		2130	8.38874		6.14202
		2160	8.40082		5.66779
		2190	8.53701		6.1033
		2220	8.31291		5.61346
		2250	8.4899		5.624
		2280	8.60293		6.05595
		2310	8.48437		6.51253
		2340		4.49386	6.17768
		2370		4.57164	5.93908
		2400		4.35709	6.03074
		2430		4.31821	5.9948
		2460		4.35216	5.95981
		2490		4.45688	5.96817
		2520		4.28018	6.13617
		2550		4.35633	6.09689
		2580		4.43909	6.04065
		2610		4.30072	6.14729
		2640		4.23491	5.88514
		2670		4.16847	5.68647
		2700		4.34932	5.826
		2730		4.2177	5.84326
		2760		4.43235	6.18199
		2790		4.11304	5.77934
		2820		4.23697	5.90998
		2850		4.47231	5.99132
		2880		4.13519	6.02966
		2910		4.49303	5.95631
		2940		4.1974	5.75056
		2970		4.18394	5.89464
		3000		4.03026	5.91127
		3030		4.02355	5.67904
		3060		4.04495	5.9704
		3090		4.18365	5.31161
		3120		4.36691	5.38575
		3150		4.19778	5.79744
		3180		4.34986	5.49341
		3210		4.34839	5.53708
		3240		4.17934	6.37069
		3270		4.40256	6.0072
		3300		4.65064	5.808
		3330		4.55298	5.81739
		3360		4.37836	5.61154
		3390		4.4659	6.113
		3420		4.4068	5.97875
		3450		4.47213	5.98705
		3480		4.57131	5.50603
		3510		4.48208	6.15395
		3540		4.47254	6.06701
		3570		4.61414	5.6611
		3600		4.43002	5.99766
		3630		4.51412	5.69727
		3660		4.60231	5.64498
		3690		4.51087	5.91365
		3720		4.68049	5.80891
		3750		4.71307	5.36615
		3780		4.57031	5.95063
		3810		4.57236	5.89989
		3840		4.62387	6.11981
		3870		4.50672	5.93863
		3900		4.62757	5.68775
		3930		4.51989	5.9074
		3960		4.62868	5.82301
		3990		4.79058	5.81329
		4020		4.51196	5.52537
		4050		4.60311	5.9783
		4080		4.54155	5.93597
		4110		4.52608	5.82973
		4140		4.23357	5.90119
		4170		4.62074	5.74962
		4200		4.7502	5.67135
		4230		4.73208	5.50609
		4260		4.79633	5.17633
		4290		4.9413	5.78034
		4320		4.76971	6.17817
		4350		4.79197	5.84206
		4380		4.74154	5.80714
		4410		4.68477	5.60132
		4440		4.79091	5.38033
		4470		4.53382	5.10798
		4500		4.4256	5.46331
		4530		4.41898	6.10828
		4560		4.32075	6.07285
		4590		4.66282	5.72842
		4620		4.76441	5.69394
		4650		4.49773	6.08232
		4680		4.71189	5.97134
		4710		4.90978	5.93658
		4740		4.67844	5.8385
		4770		4.53739	5.90347
		4800		4.63549	6.16178
		4830		4.43107	5.49639
		4860		4.70162	5.9607
		4890		4.40408	5.6153
		4920		4.78835	5.64265
		4950		4.50206	6.00978
		4980		4.60533	5.79786
