# Supplementary material for: A Tad-like apparatus is required for contact-dependent prey killing in predatory social bacteria
Source: eLife. 2021 Sep 10;10:e72409. doi: 10.7554/eLife.72409 (PMC8460266; doi:10.7554/eLife.72409)
Supplement: Figure 5—source data 3. [file elife-72409-fig5-data3.xlsx]

## Sheet: Figure 5f
	Figure 5f - source data
	Increase in M. xanthus cell length (slope, µm/s) during predation
	WT	∆kilACF mutant
	0.0002	3e-06
	0.0002	-4e-05
	0.0003	-7e-05
	0.0003	-6e-05
	0.0002	-6e-05
	0.0002	-5e-05
	0.0002	-0.0001
	0.0001	6e-05
	0.0002	-2e-05
	0.0002	-0.0001
	0.0001	5e-05
	0.0001	-2e-05
	0.0001	5e-06
	0.0001	0.0002
	0.0002	-5e-05
	0.0001	-3e-05
		-7e-05
		4e-05
		-0.0001
		-6e-05
