# Supplementary material for: A Tad-like apparatus is required for contact-dependent prey killing in predatory social bacteria
Source: eLife. 2021 Sep 10;10:e72409. doi: 10.7554/eLife.72409 (PMC8460266; doi:10.7554/eLife.72409)
Supplement: Figure 6—source data 1. [file elife-72409-fig6-data1.xlsx]

## Sheet: Exp 1 - CFU
Experiment 1			1) 200 µl prey OD600 = 5			2) after predation, spots resuspended in 500 µl CF + 10-fold serial dilutions
			mixed with 25 µl M. xanthus OD600 = 5			5 µl of each dilution spotted on Kan agar plates
			10 µl spotted on CF agar plate
		E. coli						S. typhimurium						B. subtilis						C. crescentus						P. aeruginosa									Total CFUs	E. coli						S. typhimurium						B. subtilis
	0 hours	Ec + Mx_WT_1	Ec + Mx_WT_2	Ec + Mx_∆kilACF_1	Ec + Mx_∆kilACF_2	Ec alone 1	Ec alone 2	St + Mx_WT_1	St + Mx_WT_2	St + Mx_∆kilACF_1	St + Mx_∆kilACF_2	St alone 1	St alone 2	Bs + Mx_WT_1	Bs + Mx_WT_2	Bs + Mx_∆kilACF_1	Bs + Mx_∆kilACF_2	Bs alone 1	Bs alone 2	Cc + Mx_WT_1	Cc + Mx_WT_2	Cc + Mx_∆kilACF_1	Cc + Mx_∆kilACF_2	Cc alone 1	Cc alone 2	Pa + Mx_WT_1	Pa + Mx_WT_2	Pa + Mx_∆kilACF_1	Pa + Mx_∆kilACF_2	Pa alone 1	Pa alone 2				0 hours	Ec + Mx_WT_1	Ec + Mx_WT_2	Ec + Mx_∆kilACF_1	Ec + Mx_∆kilACF_2	Ec alone 1	Ec alone 2	St + Mx_WT_1	St + Mx_WT_2	St + Mx_∆kilACF_1	St + Mx_∆kilACF_2	St alone 1	St alone 2	Bs + Mx_WT_1	Bs + Mx_WT_2
	no dilution																																	100	no dilution	0	0	0	0	0	0	0	0	0	0	0	0	0	0
	10^-1																																	1000	10^-1	0	0	0	0	0	0	0	0	0	0	0	0	0	0
	10^-2																																	10000	10^-2	0	0	0	0	0	0	0	0	0	0	0	0	0	0
	10^-3													11	8	8	14	13	7															100000	10^-3	0	0	0	0	0	0	0	0	0	0	0	0	1100000	800000
	10^-4	10	14	19	15	17	8																											1000000	10^-4	10000000	14000000	19000000	15000000	17000000	8000000	0	0	0	0	0	0	0	0
	10^-5							7	7	6	5	10	2							7	2	8	4	2	4	6	8	10	9	4	7			10000000	10^-5	0	0	0	0	0	0	70000000	70000000	60000000	50000000	100000000	20000000	0	0
	10^-6																																	100000000	10^-6	0	0	0	0	0	0	0	0	0	0	0	0	0	0
	10^-7																																	1000000000	10^-7	0	0	0	0	0	0	0	0	0	0	0	0	0	0
	10^-8																																	10000000000	10^-8	0	0	0	0	0	0	0	0	0	0	0	0	0	0
	10^-9																																		10^-9	0	0	0	0	0	0	0	0	0	0	0	0	0	0
	10^-10																																		10^-10	0	0	0	0	0	0	0	0	0	0	0	0	0	0
	10^-11																																		10^-11	0	0	0	0	0	0	0	0	0	0	0	0	0	0
	10^-12																																		10^-12	0	0	0	0	0	0	0	0	0	0	0	0	0	0
		E. coli						S. typhimurium						B. subtilis						C. crescentus						P. aeruginosa									Total CFUs	E. coli						S. typhimurium						B. subtilis
	8 hours	Ec + Mx_WT_1	Ec + Mx_WT_2	Ec + Mx_∆kilACF_1	Ec + Mx_∆kilACF_2	Ec alone 1	Ec alone 2	St + Mx_WT_1	St + Mx_WT_2	St + Mx_∆kilACF_1	St + Mx_∆kilACF_2	St alone 1	St alone 2	Bs + Mx_WT_1	Bs + Mx_WT_2	Bs + Mx_∆kilACF_1	Bs + Mx_∆kilACF_2	Bs alone 1	Bs alone 2	Cc + Mx_WT_1	Cc + Mx_WT_2	Cc + Mx_∆kilACF_1	Cc + Mx_∆kilACF_2	Cc alone 1	Cc alone 2	Pa + Mx_WT_1	Pa + Mx_WT_2	Pa + Mx_∆kilACF_1	Pa + Mx_∆kilACF_2	Pa alone 1	Pa alone 2				8 hours	Ec + Mx_WT_1	Ec + Mx_WT_2	Ec + Mx_∆kilACF_1	Ec + Mx_∆kilACF_2	Ec alone 1	Ec alone 2	St + Mx_WT_1	St + Mx_WT_2	St + Mx_∆kilACF_1	St + Mx_∆kilACF_2	St alone 1	St alone 2	Bs + Mx_WT_1	Bs + Mx_WT_2
	no dilution	0	0											1						21	8													100	no dilution	0	0	0	0	0	0	0	0	0	0	0	0	100	0
	10^-1														13																			1000	10^-1	0	0	0	0	0	0	0	0	0	0	0	0	0	13000
	10^-2			14	13	10	9																											10000	10^-2	0	0	140000	130000	100000	90000	0	0	0	0	0	0	0	0
	10^-3																																	100000	10^-3	0	0	0	0	0	0	0	0	0	0	0	0	0	0
	10^-4															12	16	26	27			20	21											1000000	10^-4	0	0	0	0	0	0	0	0	0	0	0	0	0	0
	10^-5							9	12															11	9	2	4	6	3	4	4			10000000	10^-5	0	0	0	0	0	0	90000000	120000000	0	0	0	0	0	0
	10^-6									4	9	10	2																					100000000	10^-6	0	0	0	0	0	0	0	0	400000000	900000000	1000000000	200000000	0	0
	10^-7																																	1000000000	10^-7	0	0	0	0	0	0	0	0	0	0	0	0	0	0
	10^-8																																	10000000000	10^-8	0	0	0	0	0	0	0	0	0	0	0	0	0	0
	10^-9																																		10^-9	0	0	0	0	0	0	0	0	0	0	0	0	0	0
	10^-10																																		10^-10	0	0	0	0	0	0	0	0	0	0	0	0	0	0
	10^-11																																		10^-11	0	0	0	0	0	0	0	0	0	0	0	0	0	0
	10^-12																																		10^-12	0	0	0	0	0	0	0	0	0	0	0	0	0	0
		E. coli						S. typhimurium						B. subtilis						C. crescentus						P. aeruginosa									Total CFUs	E. coli						S. typhimurium						B. subtilis
	24 hours	Ec + Mx_WT_1	Ec + Mx_WT_2	Ec + Mx_∆kilACF_1	Ec + Mx_∆kilACF_2	Ec alone 1	Ec alone 2	St + Mx_WT_1	St + Mx_WT_2	St + Mx_∆kilACF_1	St + Mx_∆kilACF_2	St alone 1	St alone 2	Bs + Mx_WT_1	Bs + Mx_WT_2	Bs + Mx_∆kilACF_1	Bs + Mx_∆kilACF_2	Bs alone 1	Bs alone 2	Cc + Mx_WT_1	Cc + Mx_WT_2	Cc + Mx_∆kilACF_1	Cc + Mx_∆kilACF_2	Cc alone 1	Cc alone 2	Pa + Mx_WT_1	Pa + Mx_WT_2	Pa + Mx_∆kilACF_1	Pa + Mx_∆kilACF_2	Pa alone 1	Pa alone 2				24 hours	Ec + Mx_WT_1	Ec + Mx_WT_2	Ec + Mx_∆kilACF_1	Ec + Mx_∆kilACF_2	Ec alone 1	Ec alone 2	St + Mx_WT_1	St + Mx_WT_2	St + Mx_∆kilACF_1	St + Mx_∆kilACF_2	St alone 1	St alone 2	Bs + Mx_WT_1	Bs + Mx_WT_2
	no dilution	0	0											0						0	0													100	no dilution	0	0	0	0	0	0	0	0	0	0	0	0	0	0
	10^-1																																	1000	10^-1	0	0	0	0	0	0	0	0	0	0	0	0	0	0
	10^-2																																	10000	10^-2	0	0	0	0	0	0	0	0	0	0	0	0	0	0
	10^-3														2																			100000	10^-3	0	0	0	0	0	0	0	0	0	0	0	0	0	200000
	10^-4																																	1000000	10^-4	0	0	0	0	0	0	0	0	0	0	0	0	0	0
	10^-5							4	6							5	7	11	8			10	15											10000000	10^-5	0	0	0	0	0	0	40000000	60000000	0	0	0	0	0	0
	10^-6			14	15	12	11			10	16	17	14											8	12	6	6	21	8	6	7			100000000	10^-6	0	0	1400000000	1500000000	1200000000	1100000000	0	0	1000000000	1600000000	1700000000	1400000000	0	0
	10^-7																																	1000000000	10^-7	0	0	0	0	0	0	0	0	0	0	0	0	0	0
	10^-8																																	10000000000	10^-8	0	0	0	0	0	0	0	0	0	0	0	0	0	0
	10^-9																																		10^-9	0	0	0	0	0	0	0	0	0	0	0	0	0	0
	10^-10																																		10^-10	0	0	0	0	0	0	0	0	0	0	0	0	0	0
	10^-11																																		10^-11	0	0	0	0	0	0	0	0	0	0	0	0	0	0
	10^-12																																		10^-12	0	0	0	0	0	0	0	0	0	0	0	0	0	0
		E. coli						S. typhimurium						B. subtilis						C. crescentus						P. aeruginosa									Total CFUs	E. coli						S. typhimurium						B. subtilis
	48 hours	Ec + Mx_WT_1	Ec + Mx_WT_2	Ec + Mx_∆kilACF_1	Ec + Mx_∆kilACF_2	Ec alone 1	Ec alone 2	St + Mx_WT_1	St + Mx_WT_2	St + Mx_∆kilACF_1	St + Mx_∆kilACF_2	St alone 1	St alone 2	Bs + Mx_WT_1	Bs + Mx_WT_2	Bs + Mx_∆kilACF_1	Bs + Mx_∆kilACF_2	Bs alone 1	Bs alone 2	Cc + Mx_WT_1	Cc + Mx_WT_2	Cc + Mx_∆kilACF_1	Cc + Mx_∆kilACF_2	Cc alone 1	Cc alone 2	Pa + Mx_WT_1	Pa + Mx_WT_2	Pa + Mx_∆kilACF_1	Pa + Mx_∆kilACF_2	Pa alone 1	Pa alone 2				48 hours	Ec + Mx_WT_1	Ec + Mx_WT_2	Ec + Mx_∆kilACF_1	Ec + Mx_∆kilACF_2	Ec alone 1	Ec alone 2	St + Mx_WT_1	St + Mx_WT_2	St + Mx_∆kilACF_1	St + Mx_∆kilACF_2	St alone 1	St alone 2	Bs + Mx_WT_1	Bs + Mx_WT_2
	no dilution	0	0					5	7					1	0					0	0													100	no dilution	0	0	0	0	0	0	500	700	0	0	0	0	100	0
	10^-1																																	1000	10^-1	0	0	0	0	0	0	0	0	0	0	0	0	0	0
	10^-2																																	10000	10^-2	0	0	0	0	0	0	0	0	0	0	0	0	0	0
	10^-3																																	100000	10^-3	0	0	0	0	0	0	0	0	0	0	0	0	0	0
	10^-4																																	1000000	10^-4	0	0	0	0	0	0	0	0	0	0	0	0	0	0
	10^-5															3	2	6	10			8	5											10000000	10^-5	0	0	0	0	0	0	0	0	0	0	0	0	0	0
	10^-6			7	9	10	16			4	6	14	14											22	17	10	11	11	13	9	8			100000000	10^-6	0	0	700000000	900000000	1000000000	1600000000	0	0	400000000	600000000	1400000000	1400000000	0	0
	10^-7																																	1000000000	10^-7	0	0	0	0	0	0	0	0	0	0	0	0	0	0
	10^-8																																	10000000000	10^-8	0	0	0	0	0	0	0	0	0	0	0	0	0	0
	10^-9																																		10^-9	0	0	0	0	0	0	0	0	0	0	0	0	0	0
	10^-10																																		10^-10	0	0	0	0	0	0	0	0	0	0	0	0	0	0
	10^-11																																		10^-11	0	0	0	0	0	0	0	0	0	0	0	0	0	0
	10^-12																																		10^-12	0	0	0	0	0	0	0	0	0	0	0	0	0	0
[truncated: 47 more columns]

## Sheet: Exp 2 - CFU
Experiment 2			1) 200 µl prey OD600 = 5			2) after predation, spots resuspended in 500 µl CF + 10-fold serial dilutions
			mixed with 25 µl M. xanthus OD600 = 5			5 µl of each dilution spotted on Kan agar plates
			10 µl spotted on CF agar plate
		E. coli						S. typhimurium						B. subtilis						C. crescentus						P. aeruginosa									Total CFUs	E. coli						S. typhimurium						B. subtilis
	0 hours	Ec + Mx_WT_1	Ec + Mx_WT_2	Ec + Mx_∆kilACF_1	Ec + Mx_∆kilACF_2	Ec alone 1	Ec alone 2	St + Mx_WT_1	St + Mx_WT_2	St + Mx_∆kilACF_1	St + Mx_∆kilACF_2	St alone 1	St alone 2	Bs + Mx_WT_1	Bs + Mx_WT_2	Bs + Mx_∆kilACF_1	Bs + Mx_∆kilACF_2	Bs alone 1	Bs alone 2	Cc + Mx_WT_1	Cc + Mx_WT_2	Cc + Mx_∆kilACF_1	Cc + Mx_∆kilACF_2	Cc alone 1	Cc alone 2	Pa + Mx_WT_1	Pa + Mx_WT_2	Pa + Mx_∆kilACF_1	Pa + Mx_∆kilACF_2	Pa alone 1	Pa alone 2				0 hours	Ec + Mx_WT_1	Ec + Mx_WT_2	Ec + Mx_∆kilACF_1	Ec + Mx_∆kilACF_2	Ec alone 1	Ec alone 2	St + Mx_WT_1	St + Mx_WT_2	St + Mx_∆kilACF_1	St + Mx_∆kilACF_2	St alone 1	St alone 2	Bs + Mx_WT_1	Bs + Mx_WT_2
	no dilution																																	100	no dilution	0	0	0	0	0	0	0	0	0	0	0	0	0	0
	10^-1																																	1000	10^-1	0	0	0	0	0	0	0	0	0	0	0	0	0	0
	10^-2																																	10000	10^-2	0	0	0	0	0	0	0	0	0	0	0	0	0	0
	10^-3																																	100000	10^-3	0	0	0	0	0	0	0	0	0	0	0	0	0	0
	10^-4	4	4	11	12	19	5							3	5	7	8	9	6															1000000	10^-4	4000000	4000000	11000000	12000000	19000000	5000000	0	0	0	0	0	0	3000000	5000000
	10^-5							7	5	9	9	12	7							3	9	7	5	2	6	5	9	9	5	4	3			10000000	10^-5	0	0	0	0	0	0	70000000	50000000	90000000	90000000	120000000	70000000	0	0
	10^-6																																	100000000	10^-6	0	0	0	0	0	0	0	0	0	0	0	0	0	0
	10^-7																																	1000000000	10^-7	0	0	0	0	0	0	0	0	0	0	0	0	0	0
	10^-8																																	10000000000	10^-8	0	0	0	0	0	0	0	0	0	0	0	0	0	0
	10^-9																																		10^-9	0	0	0	0	0	0	0	0	0	0	0	0	0	0
	10^-10																																		10^-10	0	0	0	0	0	0	0	0	0	0	0	0	0	0
	10^-11																																		10^-11	0	0	0	0	0	0	0	0	0	0	0	0	0	0
	10^-12																																		10^-12	0	0	0	0	0	0	0	0	0	0	0	0	0	0
																																				0	0	0	0	0	0	0	0	0	0	0	0	0	0
		E. coli						S. typhimurium						B. subtilis						C. crescentus						P. aeruginosa									Total CFUs	E. coli						S. typhimurium						B. subtilis
	8 hours	Ec + Mx_WT_1	Ec + Mx_WT_2	Ec + Mx_∆kilACF_1	Ec + Mx_∆kilACF_2	Ec alone 1	Ec alone 2	St + Mx_WT_1	St + Mx_WT_2	St + Mx_∆kilACF_1	St + Mx_∆kilACF_2	St alone 1	St alone 2	Bs + Mx_WT_1	Bs + Mx_WT_2	Bs + Mx_∆kilACF_1	Bs + Mx_∆kilACF_2	Bs alone 1	Bs alone 2	Cc + Mx_WT_1	Cc + Mx_WT_2	Cc + Mx_∆kilACF_1	Cc + Mx_∆kilACF_2	Cc alone 1	Cc alone 2	Pa + Mx_WT_1	Pa + Mx_WT_2	Pa + Mx_∆kilACF_1	Pa + Mx_∆kilACF_2	Pa alone 1	Pa alone 2				8 hours	Ec + Mx_WT_1	Ec + Mx_WT_2	Ec + Mx_∆kilACF_1	Ec + Mx_∆kilACF_2	Ec alone 1	Ec alone 2	St + Mx_WT_1	St + Mx_WT_2	St + Mx_∆kilACF_1	St + Mx_∆kilACF_2	St alone 1	St alone 2	Bs + Mx_WT_1	Bs + Mx_WT_2
	no dilution	3	1											12	9																			100	no dilution	300	100	0	0	0	0	0	0	0	0	0	0	1200	900
	10^-1																																	1000	10^-1	0	0	0	0	0	0	0	0	0	0	0	0	0	0
	10^-2																			12	17													10000	10^-2	0	0	0	0	0	0	0	0	0	0	0	0	0	0
	10^-3																																	100000	10^-3	0	0	0	0	0	0	0	0	0	0	0	0	0	0
	10^-4															11	17	23	21															1000000	10^-4	0	0	0	0	0	0	0	0	0	0	0	0	0	0
	10^-5			5	10	8	9	7	11													3	4	18	8	15	21	25	33	25	24			10000000	10^-5	0	0	50000000	100000000	80000000	90000000	70000000	110000000	0	0	0	0	0	0
	10^-6									7	3	2	6																					100000000	10^-6	0	0	0	0	0	0	0	0	700000000	300000000	200000000	600000000	0	0
	10^-7																																	1000000000	10^-7	0	0	0	0	0	0	0	0	0	0	0	0	0	0
	10^-8																																	10000000000	10^-8	0	0	0	0	0	0	0	0	0	0	0	0	0	0
	10^-9																																		10^-9	0	0	0	0	0	0	0	0	0	0	0	0	0	0
	10^-10																																		10^-10	0	0	0	0	0	0	0	0	0	0	0	0	0	0
	10^-11																																		10^-11	0	0	0	0	0	0	0	0	0	0	0	0	0	0
	10^-12																																		10^-12	0	0	0	0	0	0	0	0	0	0	0	0	0	0
		E. coli						S. typhimurium						B. subtilis						C. crescentus						P. aeruginosa									Total CFUs	E. coli						S. typhimurium						B. subtilis
	24 hours	Ec + Mx_WT_1	Ec + Mx_WT_2	Ec + Mx_∆kilACF_1	Ec + Mx_∆kilACF_2	Ec alone 1	Ec alone 2	St + Mx_WT_1	St + Mx_WT_2	St + Mx_∆kilACF_1	St + Mx_∆kilACF_2	St alone 1	St alone 2	Bs + Mx_WT_1	Bs + Mx_WT_2	Bs + Mx_∆kilACF_1	Bs + Mx_∆kilACF_2	Bs alone 1	Bs alone 2	Cc + Mx_WT_1	Cc + Mx_WT_2	Cc + Mx_∆kilACF_1	Cc + Mx_∆kilACF_2	Cc alone 1	Cc alone 2	Pa + Mx_WT_1	Pa + Mx_WT_2	Pa + Mx_∆kilACF_1	Pa + Mx_∆kilACF_2	Pa alone 1	Pa alone 2				24 hours	Ec + Mx_WT_1	Ec + Mx_WT_2	Ec + Mx_∆kilACF_1	Ec + Mx_∆kilACF_2	Ec alone 1	Ec alone 2	St + Mx_WT_1	St + Mx_WT_2	St + Mx_∆kilACF_1	St + Mx_∆kilACF_2	St alone 1	St alone 2	Bs + Mx_WT_1	Bs + Mx_WT_2
	no dilution	0	0											3	5					0	0													100	no dilution	0	0	0	0	0	0	0	0	0	0	0	0	300	500
	10^-1																																	1000	10^-1	0	0	0	0	0	0	0	0	0	0	0	0	0	0
	10^-2																																	10000	10^-2	0	0	0	0	0	0	0	0	0	0	0	0	0	0
	10^-3																																	100000	10^-3	0	0	0	0	0	0	0	0	0	0	0	0	0	0
	10^-4																																	1000000	10^-4	0	0	0	0	0	0	0	0	0	0	0	0	0	0
	10^-5							6	6							1	9	16	6			21	20											10000000	10^-5	0	0	0	0	0	0	60000000	60000000	0	0	0	0	0	0
	10^-6			7	7	11	10			15	23	14	20											10	11	14	18	16	17	27	12			100000000	10^-6	0	0	700000000	700000000	1100000000	1000000000	0	0	1500000000	2300000000	1400000000	2000000000	0	0
	10^-7																																	1000000000	10^-7	0	0	0	0	0	0	0	0	0	0	0	0	0	0
	10^-8																																	10000000000	10^-8	0	0	0	0	0	0	0	0	0	0	0	0	0	0
	10^-9																																		10^-9	0	0	0	0	0	0	0	0	0	0	0	0	0	0
	10^-10																																		10^-10	0	0	0	0	0	0	0	0	0	0	0	0	0	0
	10^-11																																		10^-11	0	0	0	0	0	0	0	0	0	0	0	0	0	0
	10^-12																																		10^-12	0	0	0	0	0	0	0	0	0	0	0	0	0	0
		E. coli						S. typhimurium						B. subtilis						C. crescentus						P. aeruginosa									Total CFUs	E. coli						S. typhimurium						B. subtilis
	48 hours	Ec + Mx_WT_1	Ec + Mx_WT_2	Ec + Mx_∆kilACF_1	Ec + Mx_∆kilACF_2	Ec alone 1	Ec alone 2	St + Mx_WT_1	St + Mx_WT_2	St + Mx_∆kilACF_1	St + Mx_∆kilACF_2	St alone 1	St alone 2	Bs + Mx_WT_1	Bs + Mx_WT_2	Bs + Mx_∆kilACF_1	Bs + Mx_∆kilACF_2	Bs alone 1	Bs alone 2	Cc + Mx_WT_1	Cc + Mx_WT_2	Cc + Mx_∆kilACF_1	Cc + Mx_∆kilACF_2	Cc alone 1	Cc alone 2	Pa + Mx_WT_1	Pa + Mx_WT_2	Pa + Mx_∆kilACF_1	Pa + Mx_∆kilACF_2	Pa alone 1	Pa alone 2				48 hours	Ec + Mx_WT_1	Ec + Mx_WT_2	Ec + Mx_∆kilACF_1	Ec + Mx_∆kilACF_2	Ec alone 1	Ec alone 2	St + Mx_WT_1	St + Mx_WT_2	St + Mx_∆kilACF_1	St + Mx_∆kilACF_2	St alone 1	St alone 2	Bs + Mx_WT_1	Bs + Mx_WT_2
	no dilution	0	0					1	1					5	2					0	0													100	no dilution	0	0	0	0	0	0	100	100	0	0	0	0	500	200
	10^-1																																	1000	10^-1	0	0	0	0	0	0	0	0	0	0	0	0	0	0
	10^-2																																	10000	10^-2	0	0	0	0	0	0	0	0	0	0	0	0	0	0
	10^-3																																	100000	10^-3	0	0	0	0	0	0	0	0	0	0	0	0	0	0
	10^-4																4																	1000000	10^-4	0	0	0	0	0	0	0	0	0	0	0	0	0	0
	10^-5															2			13			3	6	7	16									10000000	10^-5	0	0	0	0	0	0	0	0	0	0	0	0	0	0
	10^-6			4	13	19	14			9	4	16						4																100000000	10^-6	0	0	400000000	1300000000	1900000000	1400000000	0	0	900000000	400000000	1600000000	0	0	0
	10^-7												4													3	1	3	3	4	3			1000000000	10^-7	0	0	0	0	0	0	0	0	0	0	0	4000000000	0	0
	10^-8																																	10000000000	10^-8	0	0	0	0	0	0	0	0	0	0	0	0	0	0
	10^-9																																		10^-9	0	0	0	0	0	0	0	0	0	0	0	0	0	0
	10^-10																																		10^-10	0	0	0	0	0	0	0	0	0	0	0	0	0	0
	10^-11																																		10^-11	0	0	0	0	0	0	0	0	0	0	0	0	0	0
	10^-12																																		10^-12	0	0	0	0	0	0	0	0	0	0	0	0	0	0
[truncated: 47 more columns]

## Sheet: Exp 3 - CFU
Experiment 3			1) 200 µl prey OD600 = 5			2) after predation, spots resuspended in 500 µl CF + 10-fold serial dilutions
			mixed with 25 µl M. xanthus OD600 = 5			5 µl of each dilution spotted on Kan agar plates
			10 µl spotted on CF agar plate
		E. coli						S. typhimurium						B. subtilis						C. crescentus						P. aeruginosa									Total CFUs	E. coli						S. typhimurium						B. subtilis
	0 hours	Ec + Mx_WT_1	Ec + Mx_WT_2	Ec + Mx_∆kilACF_1	Ec + Mx_∆kilACF_2	Ec alone 1	Ec alone 2	St + Mx_WT_1	St + Mx_WT_2	St + Mx_∆kilACF_1	St + Mx_∆kilACF_2	St alone 1	St alone 2	Bs + Mx_WT_1	Bs + Mx_WT_2	Bs + Mx_∆kilACF_1	Bs + Mx_∆kilACF_2	Bs alone 1	Bs alone 2	Cc + Mx_WT_1	Cc + Mx_WT_2	Cc + Mx_∆kilACF_1	Cc + Mx_∆kilACF_2	Cc alone 1	Cc alone 2	Pa + Mx_WT_1	Pa + Mx_WT_2	Pa + Mx_∆kilACF_1	Pa + Mx_∆kilACF_2	Pa alone 1	Pa alone 2				0 hours	Ec + Mx_WT_1	Ec + Mx_WT_2	Ec + Mx_∆kilACF_1	Ec + Mx_∆kilACF_2	Ec alone 1	Ec alone 2	St + Mx_WT_1	St + Mx_WT_2	St + Mx_∆kilACF_1	St + Mx_∆kilACF_2	St alone 1	St alone 2	Bs + Mx_WT_1	Bs + Mx_WT_2
	no dilution																																	100	no dilution	0	0	0	0	0	0	0	0	0	0	0	0	0	0
	10^-1																																	1000	10^-1	0	0	0	0	0	0	0	0	0	0	0	0	0	0
	10^-2																																	10000	10^-2	0	0	0	0	0	0	0	0	0	0	0	0	0	0
	10^-3	5	8											11	13	19	14	16	24															100000	10^-3	500000	800000	0	0	0	0	0	0	0	0	0	0	1100000	1300000
	10^-4			14	7	11	9																			22	23	22	19	15	13			1000000	10^-4	0	0	14000000	7000000	11000000	9000000	0	0	0	0	0	0	0	0
	10^-5							4	4	7	7	7	6							4	2	4	4	4	5									10000000	10^-5	0	0	0	0	0	0	40000000	40000000	70000000	70000000	70000000	60000000	0	0
	10^-6																																	100000000	10^-6	0	0	0	0	0	0	0	0	0	0	0	0	0	0
	10^-7																																	1000000000	10^-7	0	0	0	0	0	0	0	0	0	0	0	0	0	0
	10^-8																																	10000000000	10^-8	0	0	0	0	0	0	0	0	0	0	0	0	0	0
	10^-9																																		10^-9	0	0	0	0	0	0	0	0	0	0	0	0	0	0
	10^-10																																		10^-10	0	0	0	0	0	0	0	0	0	0	0	0	0	0
	10^-11																																		10^-11	0	0	0	0	0	0	0	0	0	0	0	0	0	0
	10^-12																																		10^-12	0	0	0	0	0	0	0	0	0	0	0	0	0	0
		E. coli						S. typhimurium						B. subtilis						C. crescentus						P. aeruginosa									Total CFUs	E. coli						S. typhimurium						B. subtilis
	8 hours	Ec + Mx_WT_1	Ec + Mx_WT_2	Ec + Mx_∆kilACF_1	Ec + Mx_∆kilACF_2	Ec alone 1	Ec alone 2	St + Mx_WT_1	St + Mx_WT_2	St + Mx_∆kilACF_1	St + Mx_∆kilACF_2	St alone 1	St alone 2	Bs + Mx_WT_1	Bs + Mx_WT_2	Bs + Mx_∆kilACF_1	Bs + Mx_∆kilACF_2	Bs alone 1	Bs alone 2	Cc + Mx_WT_1	Cc + Mx_WT_2	Cc + Mx_∆kilACF_1	Cc + Mx_∆kilACF_2	Cc alone 1	Cc alone 2	Pa + Mx_WT_1	Pa + Mx_WT_2	Pa + Mx_∆kilACF_1	Pa + Mx_∆kilACF_2	Pa alone 1	Pa alone 2				8 hours	Ec + Mx_WT_1	Ec + Mx_WT_2	Ec + Mx_∆kilACF_1	Ec + Mx_∆kilACF_2	Ec alone 1	Ec alone 2	St + Mx_WT_1	St + Mx_WT_2	St + Mx_∆kilACF_1	St + Mx_∆kilACF_2	St alone 1	St alone 2	Bs + Mx_WT_1	Bs + Mx_WT_2
	no dilution	0	1											2	0																			100	no dilution	0	100	0	0	0	0	0	0	0	0	0	0	200	0
	10^-1																																	1000	10^-1	0	0	0	0	0	0	0	0	0	0	0	0	0	0
	10^-2																			2	10													10000	10^-2	0	0	0	0	0	0	0	0	0	0	0	0	0	0
	10^-3																																	100000	10^-3	0	0	0	0	0	0	0	0	0	0	0	0	0	0
	10^-4							24	32							11	7	13	8															1000000	10^-4	0	0	0	0	0	0	24000000	32000000	0	0	0	0	0	0
	10^-5			10	9	8	9			33	36	37	31									4	7	7	12	5	9	19	15	14	12			10000000	10^-5	0	0	100000000	90000000	80000000	90000000	0	0	330000000	360000000	370000000	310000000	0	0
	10^-6																																	100000000	10^-6	0	0	0	0	0	0	0	0	0	0	0	0	0	0
	10^-7																																	1000000000	10^-7	0	0	0	0	0	0	0	0	0	0	0	0	0	0
	10^-8																																	10000000000	10^-8	0	0	0	0	0	0	0	0	0	0	0	0	0	0
	10^-9																																		10^-9	0	0	0	0	0	0	0	0	0	0	0	0	0	0
	10^-10																																		10^-10	0	0	0	0	0	0	0	0	0	0	0	0	0	0
	10^-11																																		10^-11	0	0	0	0	0	0	0	0	0	0	0	0	0	0
	10^-12																																		10^-12	0	0	0	0	0	0	0	0	0	0	0	0	0	0
		E. coli						S. typhimurium						B. subtilis						C. crescentus						P. aeruginosa									Total CFUs	E. coli						S. typhimurium						B. subtilis
	24 hours	Ec + Mx_WT_1	Ec + Mx_WT_2	Ec + Mx_∆kilACF_1	Ec + Mx_∆kilACF_2	Ec alone 1	Ec alone 2	St + Mx_WT_1	St + Mx_WT_2	St + Mx_∆kilACF_1	St + Mx_∆kilACF_2	St alone 1	St alone 2	Bs + Mx_WT_1	Bs + Mx_WT_2	Bs + Mx_∆kilACF_1	Bs + Mx_∆kilACF_2	Bs alone 1	Bs alone 2	Cc + Mx_WT_1	Cc + Mx_WT_2	Cc + Mx_∆kilACF_1	Cc + Mx_∆kilACF_2	Cc alone 1	Cc alone 2	Pa + Mx_WT_1	Pa + Mx_WT_2	Pa + Mx_∆kilACF_1	Pa + Mx_∆kilACF_2	Pa alone 1	Pa alone 2				24 hours	Ec + Mx_WT_1	Ec + Mx_WT_2	Ec + Mx_∆kilACF_1	Ec + Mx_∆kilACF_2	Ec alone 1	Ec alone 2	St + Mx_WT_1	St + Mx_WT_2	St + Mx_∆kilACF_1	St + Mx_∆kilACF_2	St alone 1	St alone 2	Bs + Mx_WT_1	Bs + Mx_WT_2
	no dilution	0	0											0	0					0	0													100	no dilution	0	0	0	0	0	0	0	0	0	0	0	0	0	0
	10^-1																																	1000	10^-1	0	0	0	0	0	0	0	0	0	0	0	0	0	0
	10^-2																																	10000	10^-2	0	0	0	0	0	0	0	0	0	0	0	0	0	0
	10^-3																																	100000	10^-3	0	0	0	0	0	0	0	0	0	0	0	0	0	0
	10^-4																																	1000000	10^-4	0	0	0	0	0	0	0	0	0	0	0	0	0	0
	10^-5							1	4							10	11	8	10			23	17		21									10000000	10^-5	0	0	0	0	0	0	10000000	40000000	0	0	0	0	0	0
	10^-6			16	4	7	10			23	20	22	20											13		11	13	21	10	11	15			100000000	10^-6	0	0	1600000000	400000000	700000000	1000000000	0	0	2300000000	2000000000	2200000000	2000000000	0	0
	10^-7																																	1000000000	10^-7	0	0	0	0	0	0	0	0	0	0	0	0	0	0
	10^-8																																	10000000000	10^-8	0	0	0	0	0	0	0	0	0	0	0	0	0	0
	10^-9																																		10^-9	0	0	0	0	0	0	0	0	0	0	0	0	0	0
	10^-10																																		10^-10	0	0	0	0	0	0	0	0	0	0	0	0	0	0
	10^-11																																		10^-11	0	0	0	0	0	0	0	0	0	0	0	0	0	0
	10^-12																																		10^-12	0	0	0	0	0	0	0	0	0	0	0	0	0	0
		E. coli						S. typhimurium						B. subtilis						C. crescentus						P. aeruginosa									Total CFUs	E. coli						S. typhimurium						B. subtilis
	48 hours	Ec + Mx_WT_1	Ec + Mx_WT_2	Ec + Mx_∆kilACF_1	Ec + Mx_∆kilACF_2	Ec alone 1	Ec alone 2	St + Mx_WT_1	St + Mx_WT_2	St + Mx_∆kilACF_1	St + Mx_∆kilACF_2	St alone 1	St alone 2	Bs + Mx_WT_1	Bs + Mx_WT_2	Bs + Mx_∆kilACF_1	Bs + Mx_∆kilACF_2	Bs alone 1	Bs alone 2	Cc + Mx_WT_1	Cc + Mx_WT_2	Cc + Mx_∆kilACF_1	Cc + Mx_∆kilACF_2	Cc alone 1	Cc alone 2	Pa + Mx_WT_1	Pa + Mx_WT_2	Pa + Mx_∆kilACF_1	Pa + Mx_∆kilACF_2	Pa alone 1	Pa alone 2				48 hours	Ec + Mx_WT_1	Ec + Mx_WT_2	Ec + Mx_∆kilACF_1	Ec + Mx_∆kilACF_2	Ec alone 1	Ec alone 2	St + Mx_WT_1	St + Mx_WT_2	St + Mx_∆kilACF_1	St + Mx_∆kilACF_2	St alone 1	St alone 2	Bs + Mx_WT_1	Bs + Mx_WT_2
	no dilution	0	0											0	0					0	0													100	no dilution	0	0	0	0	0	0	0	0	0	0	0	0	0	0
	10^-1								10																									1000	10^-1	0	0	0	0	0	0	0	10000	0	0	0	0	0	0
	10^-2							8																										10000	10^-2	0	0	0	0	0	0	80000	0	0	0	0	0	0	0
	10^-3																																	100000	10^-3	0	0	0	0	0	0	0	0	0	0	0	0	0	0
	10^-4																																	1000000	10^-4	0	0	0	0	0	0	0	0	0	0	0	0	0	0
	10^-5															2	2	9	7			9	5											10000000	10^-5	0	0	0	0	0	0	0	0	0	0	0	0	0	0
	10^-6			14	11	21	20			10	4	16	20											16	14	10	19	19	6	18	10			100000000	10^-6	0	0	1400000000	1100000000	2100000000	2000000000	0	0	1000000000	400000000	1600000000	2000000000	0	0
	10^-7																																	1000000000	10^-7	0	0	0	0	0	0	0	0	0	0	0	0	0	0
	10^-8																																	10000000000	10^-8	0	0	0	0	0	0	0	0	0	0	0	0	0	0
	10^-9																																		10^-9	0	0	0	0	0	0	0	0	0	0	0	0	0	0
	10^-10																																		10^-10	0	0	0	0	0	0	0	0	0	0	0	0	0	0
	10^-11																																		10^-11	0	0	0	0	0	0	0	0	0	0	0	0	0	0
	10^-12																																		10^-12	0	0	0	0	0	0	0	0	0	0	0	0	0	0
[truncated: 47 more columns]
