# Supplementary figures and images for: A Tad-like apparatus is required for contact-dependent prey killing in predatory social bacteria
Source: eLife journal article supplement (doi:10.7554/elife.72409), 2021-09-10

DZ2

NG GltJ  
(control)

NG 3108

$\Delta$ 4655  
NG 3108

$\Delta$ 4650  
NG 3108

$\Delta$ 3106  
NG 3108

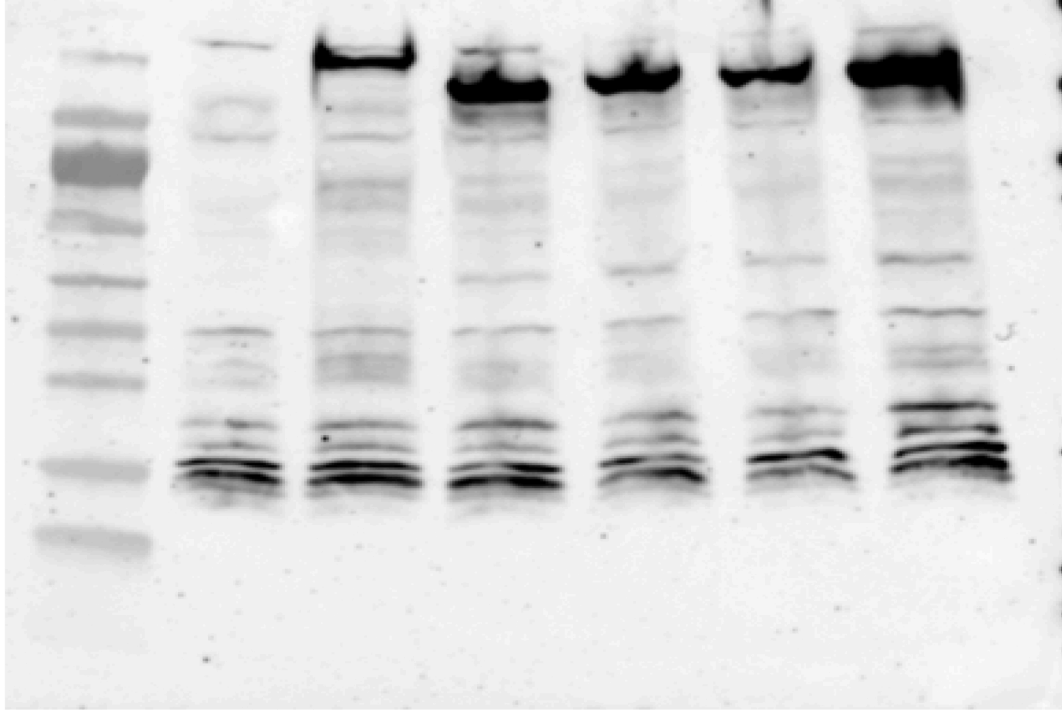

Supplement: fig4-figsupp4-data1 [file Figure 4-figure supplement 4-source data .pdf › Figure 4-figure supplement 4-source data .pdf]
